# Supplementary material for: Genomic Diversity and Evolution of Mycobacterium ulcerans Revealed by Next-Generation Sequencing
Source: PubMed Central journal article supplement (PMC2736377; doi:10.1371/journal.ppat.1000580), 2009-09-11

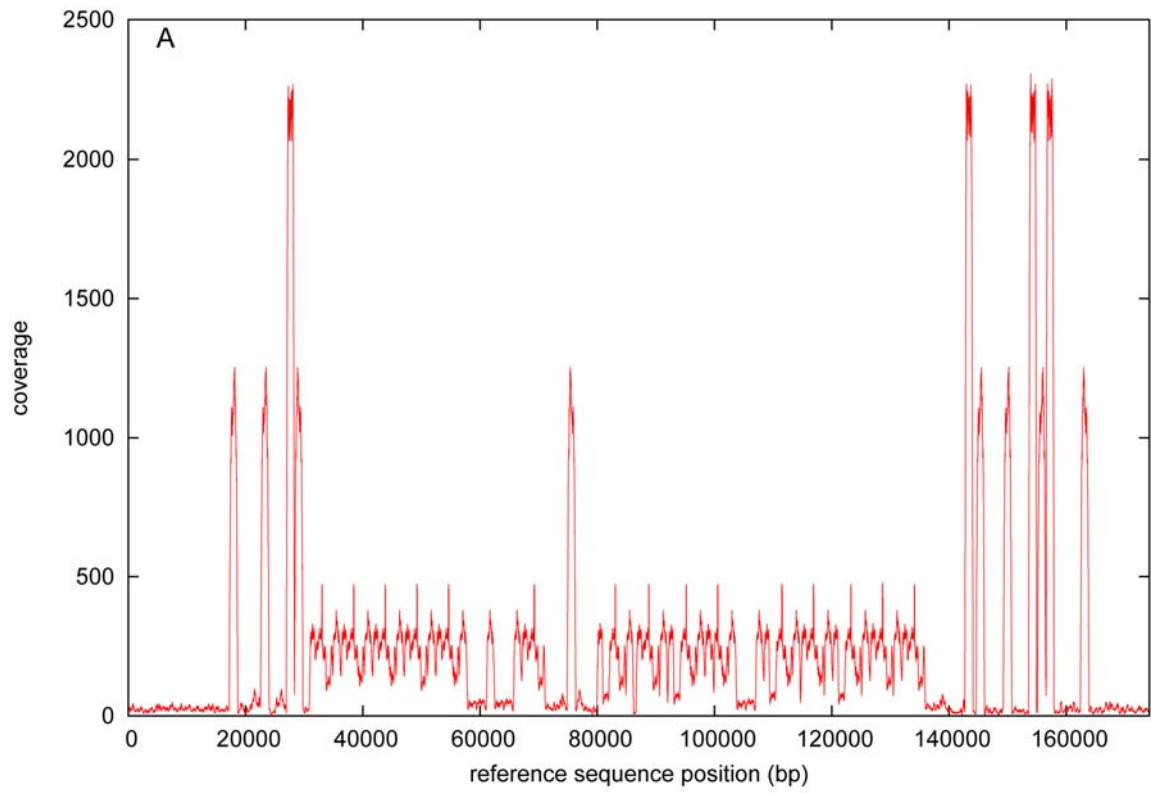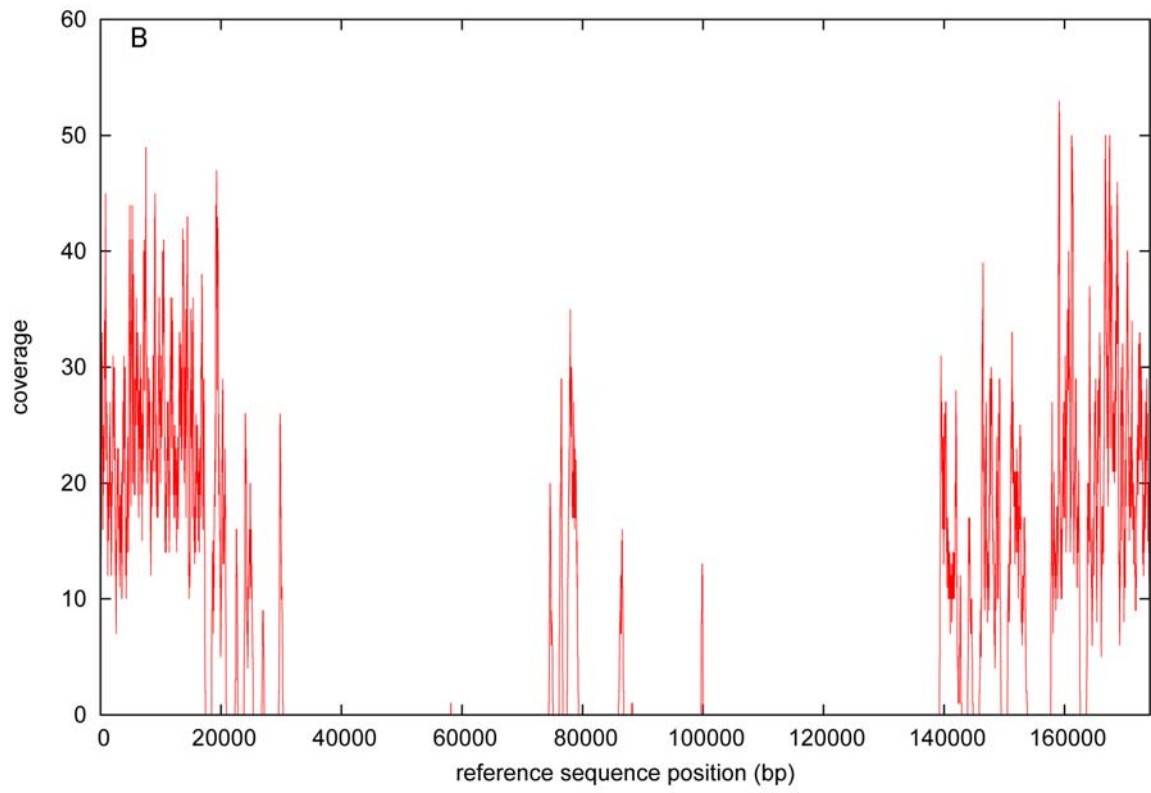

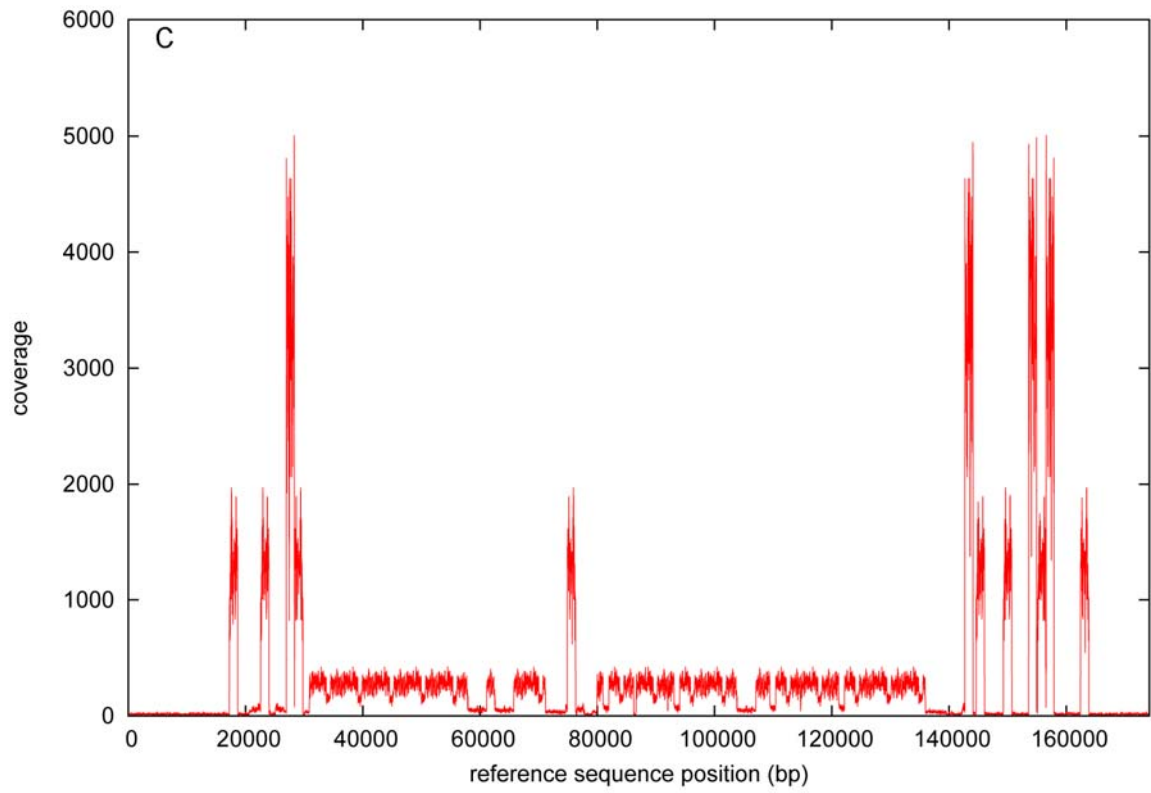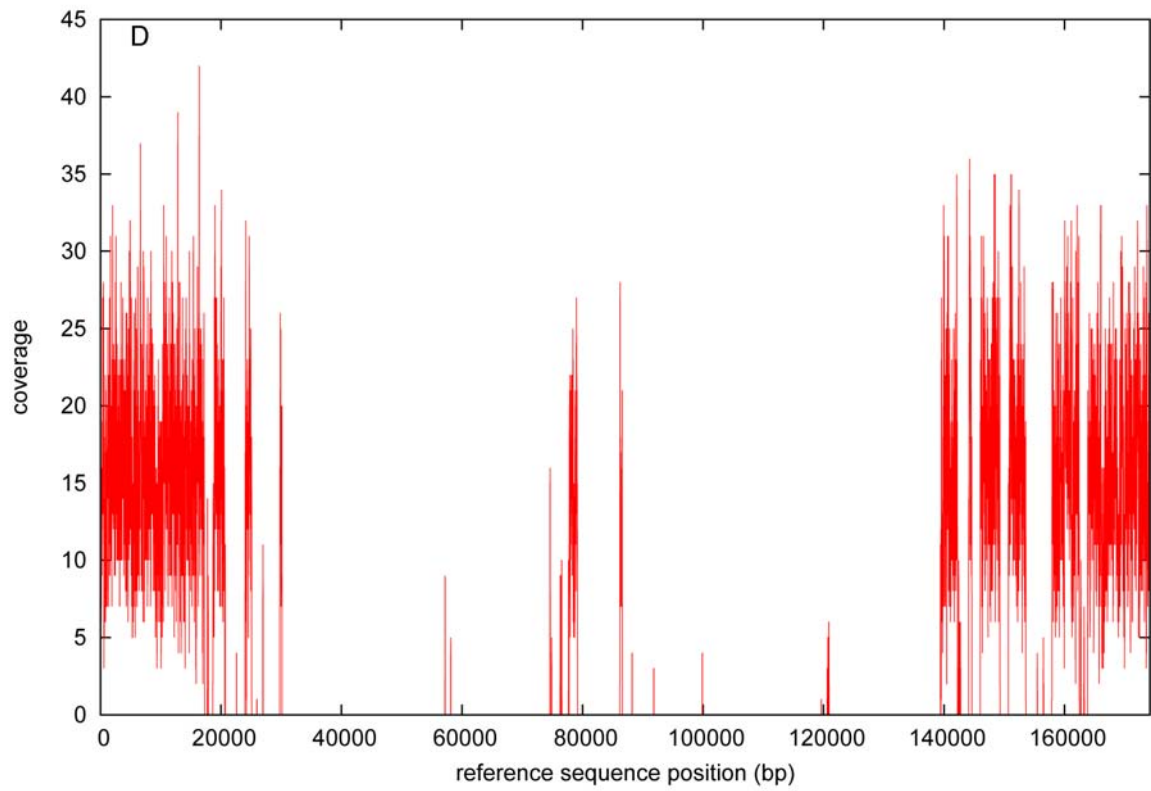

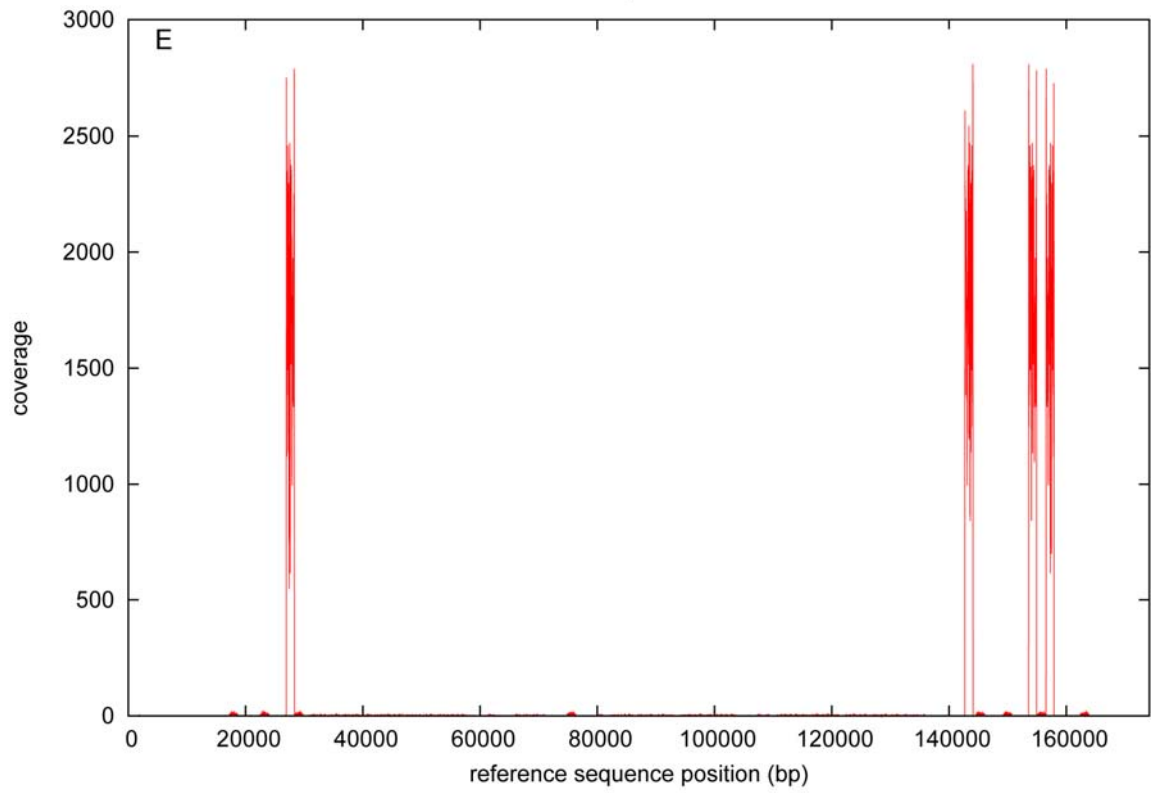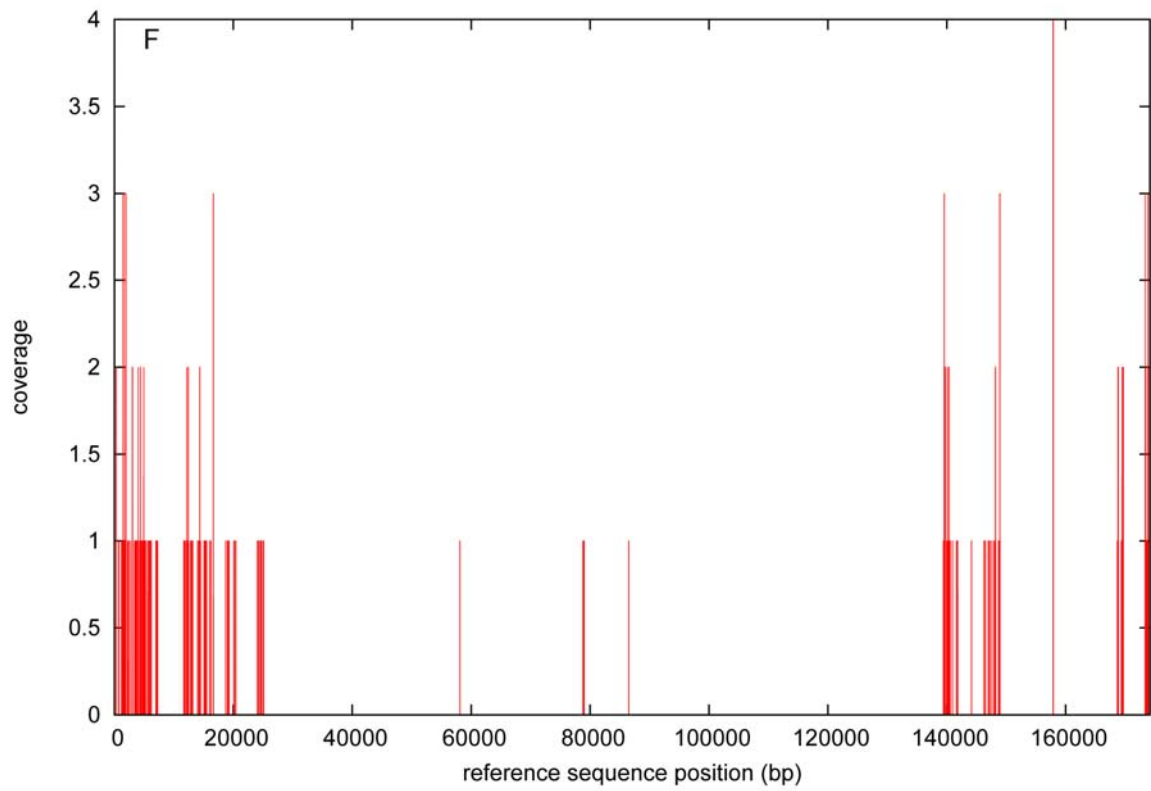

Supplement: ppat.1000580.s001.pdf [file ppat.1000580.s001.pdf]
