# Supplementary material for: Genomic Diversity and Evolution of Mycobacterium ulcerans Revealed by Next-Generation Sequencing
Source: PLoS Pathog. 2009 Sep 11;5(9):e1000580. doi: 10.1371/journal.ppat.1000580 (PMC2736377; doi:10.1371/journal.ppat.1000580)
Supplement: Table S2 — SNPs identified by NimbleGen re-sequencing array in selected chromosomal and plasmid genes. SNPs confirmed by Solexa Genome Analyzer are indicated in the last column. (0.52 MB XLS) [file ppat.1000580.s005.xls]

## Sheet: Supp_Table_2
Supplementary Table 2. SNPs identified by NimbleGen re-sequencing array in selected chromosomal and plasmid genes. SNPs confirmed by Solexa Genome Analyzer are indicated in the last column.
Reference	Locus	Gene_pos	Genome_pos	Agy99_nt	Jp8756_nt	SNP_type	Agy99_aa	Jp8756_aa	Strand	Product	Note	Solexa
NC_008611	MUL_0001	500	500	A	G	NON	D	G	1	chromosomal replication initiator protein DnaA	Detected in the cytoplasmic fraction by 2D-LC- MS/MS. Also detected in the membrane fraction by proteomics (2D-LC-MS/MS) membrane protein Plays a critical role in the initiation and regulation of chromosomal replication. Binds to the origin of replication; it binds specifically double-stranded DNA at a 9 bp consensus (DnaA box): 5'-TTATC(C/A)A(C/A)A-3'. DnaA binds to ATP and to acidic phospholipi…	G
NC_008611	MUL_0001	1092	1092	C	T	SYN	I	I	1	chromosomal replication initiator protein DnaA	Detected in the cytoplasmic fraction by 2D-LC- MS/MS. Also detected in the membrane fraction by proteomics (2D-LC-MS/MS) membrane protein Plays a critical role in the initiation and regulation of chromosomal replication. Binds to the origin of replication; it binds specifically double-stranded DNA at a 9 bp consensus (DnaA box): 5'-TTATC(C/A)A(C/A)A-3'. DnaA binds to ATP and to acidic phospholipi…	T
NC_008611	MUL_0002	186	2257	G	A	SYN	E	E	1	DNA polymerase III (beta chain) DnaN	Detected in the cytoplasmic fraction by 2D-LC- MS/MS. cytoplasmic protein DNA polymerase III is a complex, multichain enzyme responsible for most of the replicative synthesis in bacteria. this DNA polymerase also exhibits 3' to 5' exonuclease activity. the BetA chain is required for initiation of replication once it is clamped onto DNA, it slides freely (bidirectional and ATP-independent) along d…	A
NC_008611	MUL_0002	273	2344	G	C	SYN	R	R	1	DNA polymerase III (beta chain) DnaN	Detected in the cytoplasmic fraction by 2D-LC- MS/MS. cytoplasmic protein DNA polymerase III is a complex, multichain enzyme responsible for most of the replicative synthesis in bacteria. this DNA polymerase also exhibits 3' to 5' exonuclease activity. the BetA chain is required for initiation of replication once it is clamped onto DNA, it slides freely (bidirectional and ATP-independent) along d…	C
NC_008611	MUL_0002	285	2356	A	C	NON	K	N	1	DNA polymerase III (beta chain) DnaN	Detected in the cytoplasmic fraction by 2D-LC- MS/MS. cytoplasmic protein DNA polymerase III is a complex, multichain enzyme responsible for most of the replicative synthesis in bacteria. this DNA polymerase also exhibits 3' to 5' exonuclease activity. the BetA chain is required for initiation of replication once it is clamped onto DNA, it slides freely (bidirectional and ATP-independent) along d…
NC_008611	MUL_0002	447	2518	C	T	SYN	G	G	1	DNA polymerase III (beta chain) DnaN	Detected in the cytoplasmic fraction by 2D-LC- MS/MS. cytoplasmic protein DNA polymerase III is a complex, multichain enzyme responsible for most of the replicative synthesis in bacteria. this DNA polymerase also exhibits 3' to 5' exonuclease activity. the BetA chain is required for initiation of replication once it is clamped onto DNA, it slides freely (bidirectional and ATP-independent) along d…	T
NC_008611	MUL_0002	691	2762	G	A	NON	G	S	1	DNA polymerase III (beta chain) DnaN	Detected in the cytoplasmic fraction by 2D-LC- MS/MS. cytoplasmic protein DNA polymerase III is a complex, multichain enzyme responsible for most of the replicative synthesis in bacteria. this DNA polymerase also exhibits 3' to 5' exonuclease activity. the BetA chain is required for initiation of replication once it is clamped onto DNA, it slides freely (bidirectional and ATP-independent) along d…	A
NC_008611	MUL_0005	559	5786	G	A	NON	A	T	1	DNA gyrase (subunit B) GyrB	Detected in yhe cytoplasmic fraction by proteomics. cytoplasmic protein DNA gyrase negatively supercoils closed circular double-stranded DNA in an ATP-dependent manner and also catalyzes the interconversion of other topological isomers of double-stranded DNA rings, including catenanes and knotted rings [catalytic activity: ATP-dependent breakage, passage and rejoining of double-stranded DNA]	A
NC_008611	MUL_0005	2010	7237	C	T	SYN	G	G	1	DNA gyrase (subunit B) GyrB	Detected in yhe cytoplasmic fraction by proteomics. cytoplasmic protein DNA gyrase negatively supercoils closed circular double-stranded DNA in an ATP-dependent manner and also catalyzes the interconversion of other topological isomers of double-stranded DNA rings, including catenanes and knotted rings [catalytic activity: ATP-dependent breakage, passage and rejoining of double-stranded DNA]	T
NC_008611	MUL_0006	672	8017	C	T	SYN	V	V	1	DNA gyrase (subunit A) GyrA	Detected in the cytoplasmic fraction by 2D-LC- MS/MS. cytoplasmic protein DNA gyrase negatively supercoils closed circular double-stranded DNA in an ATP-dependent manner and also catalyzes the interconversion of other topological isomers of double-stranded DNA rings, including catenanes and knotted rings [catalytic activity: ATP-dependent breakage, passage and rejoining of double-stranded DNA]	T
NC_008611	MUL_0006	813	8158	C	T	SYN	V	V	1	DNA gyrase (subunit A) GyrA	Detected in the cytoplasmic fraction by 2D-LC- MS/MS. cytoplasmic protein DNA gyrase negatively supercoils closed circular double-stranded DNA in an ATP-dependent manner and also catalyzes the interconversion of other topological isomers of double-stranded DNA rings, including catenanes and knotted rings [catalytic activity: ATP-dependent breakage, passage and rejoining of double-stranded DNA]	T
NC_008611	MUL_0006	1121	8466	C	T	NON	T	I	1	DNA gyrase (subunit A) GyrA	Detected in the cytoplasmic fraction by 2D-LC- MS/MS. cytoplasmic protein DNA gyrase negatively supercoils closed circular double-stranded DNA in an ATP-dependent manner and also catalyzes the interconversion of other topological isomers of double-stranded DNA rings, including catenanes and knotted rings [catalytic activity: ATP-dependent breakage, passage and rejoining of double-stranded DNA]	T
NC_008611	MUL_0006	2298	9643	A	G	SYN	A	A	1	DNA gyrase (subunit A) GyrA	Detected in the cytoplasmic fraction by 2D-LC- MS/MS. cytoplasmic protein DNA gyrase negatively supercoils closed circular double-stranded DNA in an ATP-dependent manner and also catalyzes the interconversion of other topological isomers of double-stranded DNA rings, including catenanes and knotted rings [catalytic activity: ATP-dependent breakage, passage and rejoining of double-stranded DNA]	G
NC_008611	MUL_0010	165	11525	C	G	NON	D	E	1	hypothetical protein	cytoplasmic protein	G
NC_008611	MUL_0010	213	11573	T	C	SYN	V	V	1	hypothetical protein	cytoplasmic protein	C
NC_008611	MUL_0010	225	11585	G	A	SYN	R	R	1	hypothetical protein	cytoplasmic protein	A
NC_008611	MUL_0010	502	11862	C	T	NON	Q	*	1	hypothetical protein	cytoplasmic protein	T
NC_008611	MUL_0010	529	11889	G	A	NON	A	T	1	hypothetical protein	cytoplasmic protein	A
NC_008611	MUL_0016	176	15416	G	A	NON	S	N	1	hypothetical protein	membrane protein	A
NC_008611	MUL_0024	305	26247	G	C	NON	A	G	-1	hypothetical protein	Detected in the cytoplasmic and secreted fractions by 2D-LC-MS/MS. secreted protein function unknown, contains FHA domain	C
NC_008611	MUL_0027	450	29066	A	G	SYN	P	P	1	glycosylase	cytoplasmic protein	G
NC_008611	MUL_0028	337	29826	G	C	NON	R	G	-1	shortchain dehydrogenase	cytoplasmic protein	C
NC_008611	MUL_0029	582	31021	G	C	SYN	T	T	1	hypothetical protein	cytoplasmic protein	C
NC_008611	MUL_0032	213	32708	C	A	NON	E	D	-1	hypothetical protein	membrane protein	A
NC_008611	MUL_0035	27	35205	C	T	SYN	R	R	1	DNA-binding protein	Detected in the cytoplasmic fraction by 2D-LC- MS/MS. cytoplasmic protein	T
NC_008611	MUL_0036	326	36310	G	A	NON	T	M	-1	hypothetical protein		A
NC_008611	MUL_0037	528	37292	C	T	SYN	G	G	1	ammonium-transport integral membrane protein, Amt_1	membrane protein thought to be involved in transport of ammonium across the membrane (export) responsible for the translocation of the substrate across the membrane.	T
NC_008611	MUL_0037	550	37314	C	G	NON	P	V	1	ammonium-transport integral membrane protein, Amt_1	membrane protein thought to be involved in transport of ammonium across the membrane (export) responsible for the translocation of the substrate across the membrane.
NC_008611	MUL_0037	551	37315	C	T	NON	P	V	1	ammonium-transport integral membrane protein, Amt_1	membrane protein thought to be involved in transport of ammonium across the membrane (export) responsible for the translocation of the substrate across the membrane.	T
NC_008611	MUL_0044	60	42153	T	C	SYN	A	A	1	hypothetical protein	cytoplasmic protein	C
NC_008611	MUL_0044	73	42166	A	G	NON	K	E	1	hypothetical protein	cytoplasmic protein	G
NC_008611	MUL_0044	1070	43163	G	C	NON	R	T	1	hypothetical protein	cytoplasmic protein	C
NC_008611	MUL_0044	1075	43168	T	C	NON	W	R	1	hypothetical protein	cytoplasmic protein	C
NC_008611	MUL_0047	65	44312	T	C	NON	V	A	1	hypothetical protein		C
NC_008611	MUL_0047	187	44434	C	T	SYN	L	L	1	hypothetical protein		T
NC_008611	MUL_0050	119	46816	G	C	NON	T	S	-1	hypothetical protein	cytoplasmic protein	C
NC_008611	MUL_0051	1288	46942	A	C	NON	C	G	-1	conserved integral membrane protein	membrane protein	C
NC_008611	MUL_0056	603	52398	C	T	SYN	R	R	1	leucyl-tRNA synthetase LeuS	cytoplasmic protein involved in translation mechanism [catalytic activity: ATP + L-leucine + tRNA(Leu) = AMP + diphosphate + L-leucyl-tRNA(Leu)]	T
NC_008611	MUL_0056	1098	52893	A	G	SYN	L	L	1	leucyl-tRNA synthetase LeuS	cytoplasmic protein involved in translation mechanism [catalytic activity: ATP + L-leucine + tRNA(Leu) = AMP + diphosphate + L-leucyl-tRNA(Leu)]	G
NC_008611	MUL_0056	1132	52927	T	C	SYN	L	L	1	leucyl-tRNA synthetase LeuS	cytoplasmic protein involved in translation mechanism [catalytic activity: ATP + L-leucine + tRNA(Leu) = AMP + diphosphate + L-leucyl-tRNA(Leu)]	C
NC_008611	MUL_0056	1317	53112	G	C	SYN	A	A	1	leucyl-tRNA synthetase LeuS	cytoplasmic protein involved in translation mechanism [catalytic activity: ATP + L-leucine + tRNA(Leu) = AMP + diphosphate + L-leucyl-tRNA(Leu)]	C
NC_008611	MUL_0061	14	59377	C	T	NON	C	Y	-1	transcriptional regulatory protein (probably GntR-family)	cytoplasmic protein involved in transcriptional mechanism.	T
NC_008611	MUL_0063	559	60683	C	T	NON	V	M	-1	hydrolase	cytoplasmic protein function unknown, probably involved in lipid biosynthesis.	T
NC_008611	MUL_0063	312	60930	T	C	SYN	Q	Q	-1	hydrolase	cytoplasmic protein function unknown, probably involved in lipid biosynthesis.	C
NC_008611	MUL_0063	291	60951	T	C	SYN	Q	Q	-1	hydrolase	cytoplasmic protein function unknown, probably involved in lipid biosynthesis.	C
NC_008611	MUL_0065	528	62482	G	A	SYN	H	H	-1	hypothetical protein	cytoplasmic protein	A
NC_008611	MUL_0065	216	62794	A	G	SYN	L	L	-1	hypothetical protein	cytoplasmic protein	G
NC_008611	MUL_0065	117	62893	C	A	SYN	L	L	-1	hypothetical protein	cytoplasmic protein	A
NC_008611	MUL_0066	838	63197	T	C	NON	S	G	-1	hypothetical protein	membrane protein	C
NC_008611	MUL_0066	19	64016	C	A	NON	A	S	-1	hypothetical protein	membrane protein	A
NC_008611	MUL_0074	171	70924	A	G	SYN	K	K	1	50S ribosomal protein L9 RplI	cytoplasmic protein binds to the 23S rRNA.	G
NC_008611	MUL_0075	183	71925	T	C	SYN	R	R	1	replicative DNA helicase DnaB	cytoplasmic protein participates in initiation and elongation during chromosome replication; it exhibits DNA-dependent ATPase activity. the intein is an endonuclease (potential)	C
NC_008611	MUL_0076	333	74022	G	C	NON	M	I	1	hypothetical protein	cytoplasmic protein	C
NC_008611	MUL_0076	582	74271	A	C	SYN	P	P	1	hypothetical protein	cytoplasmic protein	C
NC_008611	MUL_0077	610	74495	G	C	NON	L	V	-1	hydrolase	cytoplasmic protein function unknown, possibly involved in cellular metabolism.	C
NC_008611	MUL_0077	447	74658	T	C	SYN	L	L	-1	hydrolase	cytoplasmic protein function unknown, possibly involved in cellular metabolism.	C
NC_008611	MUL_0077	291	74814	A	G	SYN	T	T	-1	hydrolase	cytoplasmic protein function unknown, possibly involved in cellular metabolism.	G
NC_008611	MUL_0080	539	77340	C	T	NON	G	D	-1	transcriptional regulator	cytoplasmic protein
NC_008611	MUL_0080	518	77361	G	C	NON	P	R	-1	transcriptional regulator	cytoplasmic protein	C
NC_008611	MUL_0089	657	86535	T	C	SYN	A	A	1	hypothetical protein	cytoplasmic protein	C
NC_008611	MUL_0089	675	86553	T	G	SYN	L	L	1	hypothetical protein	cytoplasmic protein	G
NC_008611	MUL_0089	966	86844	C	T	SYN	P	P	1	hypothetical protein	cytoplasmic protein	T
NC_008611	MUL_0089	1096	86974	A	G	NON	T	A	1	hypothetical protein	cytoplasmic protein	G
NC_008611	MUL_0093	98	90202	T	C	NON	E	G	-1	hypothetical protein	cytoplasmic protein	C
NC_008611	MUL_0109	415	109595	C	G	NON	H	D	1	ethanolamine ammonia-lyase light chain, EutC	cytoplasmic protein ethanolamine ammonia-lyase is a bacterial enzyme that catalyses the adenosylcobalamin-dependent conversion of certain vicinal amino alcohols to oxo compounds and ammonia.	G
NC_008611	MUL_0109	749	109929	T	C	NON	V	A	1	ethanolamine ammonia-lyase light chain, EutC	cytoplasmic protein ethanolamine ammonia-lyase is a bacterial enzyme that catalyses the adenosylcobalamin-dependent conversion of certain vicinal amino alcohols to oxo compounds and ammonia.	C
NC_008611	MUL_0110	1074	110089	C	T	SYN	A	A	-1	protein containing vWA domain	membrane protein	T
NC_008611	MUL_0110	857	110306	T	C	NON	D	G	-1	protein containing vWA domain	membrane protein	C
NC_008611	MUL_0110	852	110311	G	C	SYN	A	A	-1	protein containing vWA domain	membrane protein
NC_008611	MUL_0112	138	112598	T	C	SYN	E	E	-1	membrane oxidoreductase	membrane protein function unknown, probably involved in cellular metabolism.	C
NC_008611	MUL_0125	763	123531	G	A	NON	P	S	-1	conserved secreted protein	Detected in the membrane fraction by proteomics (LC- MS/MS) membrane protein	A
NC_008611	MUL_0125	747	123547	A	C	SYN	S	S	-1	conserved secreted protein	Detected in the membrane fraction by proteomics (LC- MS/MS) membrane protein	C
NC_008611	MUL_0128	942	129292	G	T	SYN	S	S	1	monooxygenase	cytoplasmic protein function unknown, probably involved in cellular metabolism.	T
NC_008611	MUL_0129	404	130010	T	C	NON	V	A	1	hypothetical protein	cytoplasmic protein possible carbohydrate transport and metabolism	C
NC_008611	MUL_0129	726	130332	G	C	SYN	V	V	1	hypothetical protein	cytoplasmic protein possible carbohydrate transport and metabolism	C
NC_008611	MUL_0129	807	130413	C	A	SYN	A	A	1	hypothetical protein	cytoplasmic protein possible carbohydrate transport and metabolism
NC_008611	MUL_0129	808	130414	C	A	NON	P	T	1	hypothetical protein	cytoplasmic protein possible carbohydrate transport and metabolism
NC_008611	MUL_0135	495	138514	C	G	NON	F	L	1	transcriptional regulatory protein (probably TetR-family)	cytoplasmic protein involved in transcriptional mechanism.	G
NC_008611	MUL_0138	554	141794	G	C	NON	R	P	1	5-methyltetrahydropteroyltriglutamate-- homocysteine methyltransferase MetE	catalyzes the transfer of a methyl group from 5- methyltetrahydrofolate to homocysteine resulting in methionine formation (pathway: terminal step in the de novo biosynthesis of methionine) [catalytic activity : 5- methyltetrahydropteroyltri-L-glutamate + l- homocysteine = tetrahydropteroyltri-L-glutamate + L-methionine]	C
NC_008611	MUL_0138	569	141809	T	C	NON	V	A	1	5-methyltetrahydropteroyltriglutamate-- homocysteine methyltransferase MetE	catalyzes the transfer of a methyl group from 5- methyltetrahydrofolate to homocysteine resulting in methionine formation (pathway: terminal step in the de novo biosynthesis of methionine) [catalytic activity : 5- methyltetrahydropteroyltri-L-glutamate + l- homocysteine = tetrahydropteroyltri-L-glutamate + L-methionine]	C
NC_008611	MUL_0138	633	141873	G	A	SYN	G	G	1	5-methyltetrahydropteroyltriglutamate-- homocysteine methyltransferase MetE	catalyzes the transfer of a methyl group from 5- methyltetrahydrofolate to homocysteine resulting in methionine formation (pathway: terminal step in the de novo biosynthesis of methionine) [catalytic activity : 5- methyltetrahydropteroyltri-L-glutamate + l- homocysteine = tetrahydropteroyltri-L-glutamate + L-methionine]	A
NC_008611	MUL_0138	933	142173	G	A	SYN	A	A	1	5-methyltetrahydropteroyltriglutamate-- homocysteine methyltransferase MetE	catalyzes the transfer of a methyl group from 5- methyltetrahydrofolate to homocysteine resulting in methionine formation (pathway: terminal step in the de novo biosynthesis of methionine) [catalytic activity : 5- methyltetrahydropteroyltri-L-glutamate + l- homocysteine = tetrahydropteroyltri-L-glutamate + L-methionine]	A
NC_008611	MUL_0138	1372	142612	T	C	SYN	L	L	1	5-methyltetrahydropteroyltriglutamate-- homocysteine methyltransferase MetE	catalyzes the transfer of a methyl group from 5- methyltetrahydrofolate to homocysteine resulting in methionine formation (pathway: terminal step in the de novo biosynthesis of methionine) [catalytic activity : 5- methyltetrahydropteroyltri-L-glutamate + l- homocysteine = tetrahydropteroyltri-L-glutamate + L-methionine]
NC_008611	MUL_0138	2365	143605	A	C	NON	T	P	1	5-methyltetrahydropteroyltriglutamate-- homocysteine methyltransferase MetE	catalyzes the transfer of a methyl group from 5- methyltetrahydrofolate to homocysteine resulting in methionine formation (pathway: terminal step in the de novo biosynthesis of methionine) [catalytic activity : 5- methyltetrahydropteroyltri-L-glutamate + l- homocysteine = tetrahydropteroyltri-L-glutamate + L-methionine]	C
NC_008611	MUL_0150	407	156238	A	G	NON	H	R	1	hypothetical protein	cytoplasmic protein	G
NC_008611	MUL_0152	238	157623	C	G	NON	E	Q	-1	hypothetical protein	Detected in the cytoplasmic fraction by 2D-LC- MS/MS.	G
NC_008611	MUL_0158	213	161786	G	A	SYN	D	D	-1	hypothetical protein		A
NC_008611	MUL_0168	778	171337	C	G	NON	E	Q	-1	4-hydroxy-3-methylbut-2-enyl diphosphate reductase IspH	cytoplasmic protein converts 1-hydroxy-2-methyl-2-(E)-butenyl 4- diphosphate into isopentenyl diphosphate (Ipp) and dimethylallyl diphosphate (DMAPP) (by similarity)[catalytic activity] isopentenyl diphosphate + NAD(P)(+) + H(2)O = (E)-4-hydroxy-3-methylbut-2-en-1-yl diphosphate + NAD(P)H. [cofactor] binds 1 3Fe-4S cluster (by similarity)[pathway] isoprenoid biosynthesis; dimethylallyl-PP biosynt…
NC_008611	MUL_0179	601	181615	C	T	NON	G	S	-1	hypothetical protein	Detected in the membrane fraction by proteomics (LC- MS/MS) membrane protein	T
NC_008611	MUL_0179	220	181996	T	G	SYN	R	R	-1	hypothetical protein	Detected in the membrane fraction by proteomics (LC- MS/MS) membrane protein	G
NC_008611	MUL_0190	20	194433	A	G	NON	V	A	-1	PE-PGRS family protein	PE_PGRS20; membrane protein	G
NC_008611	MUL_0191	53	195124	G	A	NON	A	V	-1	hypothetical protein	membrane protein	A
NC_008611	MUL_0192	966	195663	T	C	SYN	G	G	-1	hypothetical protein	membrane protein	C
NC_008611	MUL_0192	842	195787	A	G	NON	L	P	-1	hypothetical protein	membrane protein	G
NC_008611	MUL_0192	809	195820	T	C	NON	E	G	-1	hypothetical protein	membrane protein	C
NC_008611	MUL_0192	54	196575	A	G	SYN	Y	Y	-1	hypothetical protein	membrane protein	G
NC_008611	MUL_0202	664	204889	C	T	NON	V	I	-1	proline-rich antigen Pra-like protein	Detected in the membrane fraction by proteomics (2D- LC-MS/MS) membrane protein	T
NC_008611	MUL_0202	400	205153	G	A	NON	P	S	-1	proline-rich antigen Pra-like protein	Detected in the membrane fraction by proteomics (2D- LC-MS/MS) membrane protein	A
NC_008611	MUL_0203	700	206443	T	C	NON	T	A	-1	cystathionine beta-synthase Cbs	Detected in the cytoplasmic fraction by 2D-LC- MS/MS. Also detected in the membrane fraction by proteomics (LC-MS/MS) cytoplasmic protein thought to be involved in homocysteine transulfuration [catalytic activity: L-serine + L- homocysteine = cystathionine + H2O]	C
NC_008611	MUL_0206	601	209133	A	C	NON	N	H	1	hypothetical protein	secreted protein	C
NC_008611	MUL_0206	928	209460	C	T	SYN	L	L	1	hypothetical protein	secreted protein	T
NC_008611	MUL_0207	295	209881	G	A	NON	V	M	1	beta-ketoacyl CoA thiolase FadA3	cytoplasmic protein function unknown, but supposed involved in lipid degradation (BetA oxidation)	A
NC_008611	MUL_0207	619	210205	G	A	NON	G	S	1	beta-ketoacyl CoA thiolase FadA3	cytoplasmic protein function unknown, but supposed involved in lipid degradation (BetA oxidation)	A
NC_008611	MUL_0207	1042	210628	G	A	NON	E	K	1	beta-ketoacyl CoA thiolase FadA3	cytoplasmic protein function unknown, but supposed involved in lipid degradation (BetA oxidation)	A
NC_008611	MUL_0208	528	211300	G	A	SYN	F	F	-1	hypothetical protein	membrane protein	A
NC_008611	MUL_0208	480	211348	C	T	SYN	G	G	-1	hypothetical protein	membrane protein	T
NC_008611	MUL_0208	422	211406	A	G	NON	V	A	-1	hypothetical protein	membrane protein	G
NC_008611	MUL_0208	391	211437	G	A	NON	L	F	-1	hypothetical protein	membrane protein	A
NC_008611	MUL_0208	124	211704	C	T	NON	A	T	-1	hypothetical protein	membrane protein	T
NC_008611	MUL_0209	124	212198	T	C	NON	F	L	1	enoyl-CoA hydratase EchA9	Detected in the cytoplasmic fraction and in the extracellular matrix by proteomics. extracellular matrix protein oxidizes fatty acids using specific components (by similarity) [catalytic activity: (3S)-3-hydroxyacyl-CoA = trans-2(or 3)-enoyl-CoA + H(2)O]	C
NC_008611	MUL_0212	978	216882	G	C	SYN	G	G	1	PE-PGRS family protein	PE_PGRS9_3; membrane protein
NC_008611	MUL_0212	1069	216973	A	G	NON	S	G	1	PE-PGRS family protein	PE_PGRS9_3; membrane protein
NC_008611	MUL_0227	1206	231893	G	A	SYN	I	I	-1	arylsulfatase, AslA	cytoplasmic protein thought to play an important role in the mineralization of sulfates [catalytic activity: a phenol sulfate + H2O = a phenol + sulfate]	A
NC_008611	MUL_0227	395	232704	C	T	NON	C	Y	-1	arylsulfatase, AslA	cytoplasmic protein thought to play an important role in the mineralization of sulfates [catalytic activity: a phenol sulfate + H2O = a phenol + sulfate]	T
NC_008611	MUL_0227	18	233081	C	G	SYN	P	P	-1	arylsulfatase, AslA	cytoplasmic protein thought to play an important role in the mineralization of sulfates [catalytic activity: a phenol sulfate + H2O = a phenol + sulfate]	G
NC_008611	MUL_0229	1620	234390	G	C	NON	D	E	-1	medium chain fatty-acid-CoA ligase FadD14	cytoplasmic protein involved in the fatty acid BetA oxidation pathway (degradation)	C
NC_008611	MUL_0229	1600	234410	T	C	NON	S	G	-1	medium chain fatty-acid-CoA ligase FadD14	cytoplasmic protein involved in the fatty acid BetA oxidation pathway (degradation)	C
NC_008611	MUL_0229	666	235344	T	C	SYN	R	R	-1	medium chain fatty-acid-CoA ligase FadD14	cytoplasmic protein involved in the fatty acid BetA oxidation pathway (degradation)	C
NC_008611	MUL_0229	649	235361	G	C	NON	L	V	-1	medium chain fatty-acid-CoA ligase FadD14	cytoplasmic protein involved in the fatty acid BetA oxidation pathway (degradation)	C
NC_008611	MUL_0233	2296	239556	C	G	NON	V	L	-1	metal cation transporter ATPase p-type CtpE	membrane protein metal cation-transporting ATPase; possibly catalyzes the transport of undeterminated metal cation with hydrolyse of ATP [catalytic activity: ATP + H(2)O + undeterminated metal cation(in) = ADP + phosphate + undeterminated metal cation(out)]	G
NC_008611	MUL_0233	1923	239929	G	A	SYN	S	S	-1	metal cation transporter ATPase p-type CtpE	membrane protein metal cation-transporting ATPase; possibly catalyzes the transport of undeterminated metal cation with hydrolyse of ATP [catalytic activity: ATP + H(2)O + undeterminated metal cation(in) = ADP + phosphate + undeterminated metal cation(out)]	A
NC_008611	MUL_0233	1368	240484	C	G	SYN	V	V	-1	metal cation transporter ATPase p-type CtpE	membrane protein metal cation-transporting ATPase; possibly catalyzes the transport of undeterminated metal cation with hydrolyse of ATP [catalytic activity: ATP + H(2)O + undeterminated metal cation(in) = ADP + phosphate + undeterminated metal cation(out)]	G
NC_008611	MUL_0233	1058	240794	C	G	NON	W	S	-1	metal cation transporter ATPase p-type CtpE	membrane protein metal cation-transporting ATPase; possibly catalyzes the transport of undeterminated metal cation with hydrolyse of ATP [catalytic activity: ATP + H(2)O + undeterminated metal cation(in) = ADP + phosphate + undeterminated metal cation(out)]
NC_008611	MUL_0233	693	241159	G	A	SYN	F	F	-1	metal cation transporter ATPase p-type CtpE	membrane protein metal cation-transporting ATPase; possibly catalyzes the transport of undeterminated metal cation with hydrolyse of ATP [catalytic activity: ATP + H(2)O + undeterminated metal cation(in) = ADP + phosphate + undeterminated metal cation(out)]	A
NC_008611	MUL_0233	90	241762	C	A	NON	R	S	-1	metal cation transporter ATPase p-type CtpE	membrane protein metal cation-transporting ATPase; possibly catalyzes the transport of undeterminated metal cation with hydrolyse of ATP [catalytic activity: ATP + H(2)O + undeterminated metal cation(in) = ADP + phosphate + undeterminated metal cation(out)]	A
NC_008611	MUL_0235	1077	243712	A	G	SYN	D	D	-1	hypothetical protein	Detected in the membrane fraction by proteomics (LC- MS/MS) membrane protein
NC_008611	MUL_0235	1069	243720	C	G	NON	G	R	-1	hypothetical protein	Detected in the membrane fraction by proteomics (LC- MS/MS) membrane protein
NC_008611	MUL_0235	863	243926	C	T	NON	S	N	-1	hypothetical protein	Detected in the membrane fraction by proteomics (LC- MS/MS) membrane protein	T
NC_008611	MUL_0236	490	245037	G	A	NON	H	Y	-1	enoyl-CoA hydratase EchA6	Also detected in the membrane fraction by proteomics (2D-LC-MS/MS) oxidizes fatty acids using specific components [catalytic activity: (3S)-3-hydroxyacyl-CoA = trans-2(or 3)-enoyl-CoA + H(2)O]	A
NC_008611	MUL_0240	163	248254	T	A	NON	S	T	1	conserved two-domain transmembrane protein	C-term truncated 20aa. membrane protein function unknown, but maybe involved in efflux system (probably sugar or drug transport)	A
NC_008611	MUL_0240	1315	249406	G	A	NON	V	I	1	conserved two-domain transmembrane protein	C-term truncated 20aa. membrane protein function unknown, but maybe involved in efflux system (probably sugar or drug transport)	A
NC_008611	MUL_0240	1342	249433	A	G	NON	T	A	1	conserved two-domain transmembrane protein	C-term truncated 20aa. membrane protein function unknown, but maybe involved in efflux system (probably sugar or drug transport)
NC_008611	MUL_0241	469	250081	C	T	NON	R	C	1	8-amino-7-oxononanoate synthase BioF2_1	cytoplasmic protein could be involved in biotin biosynthesis (at the first step) [catalytic activity: 6-carboxyhexanoyl-CoA + L- alanine = 8-amino-7-oxononanoate + CoA + CO2]	T
NC_008611	MUL_0241	831	250443	G	A	SYN	S	S	1	8-amino-7-oxononanoate synthase BioF2_1	cytoplasmic protein could be involved in biotin biosynthesis (at the first step) [catalytic activity: 6-carboxyhexanoyl-CoA + L- alanine = 8-amino-7-oxononanoate + CoA + CO2]	A
NC_008611	MUL_0241	899	250511	G	A	NON	R	H	1	8-amino-7-oxononanoate synthase BioF2_1	cytoplasmic protein could be involved in biotin biosynthesis (at the first step) [catalytic activity: 6-carboxyhexanoyl-CoA + L- alanine = 8-amino-7-oxononanoate + CoA + CO2]
NC_008611	MUL_0241	1121	250733	T	A	NON	V	D	1	8-amino-7-oxononanoate synthase BioF2_1	cytoplasmic protein could be involved in biotin biosynthesis (at the first step) [catalytic activity: 6-carboxyhexanoyl-CoA + L- alanine = 8-amino-7-oxononanoate + CoA + CO2]	A
NC_008611	MUL_0242	637	251687	C	T	NON	L	F	1	cysteine synthase B CysM	cytoplasmic protein involved in cysteine biosynthesis [catalytic activity : O3-acetyl-L-serine + H(2)S = L-cysteine + acetate]	T
NC_008611	MUL_0242	923	251973	G	C	NON	R	P	1	cysteine synthase B CysM	cytoplasmic protein involved in cysteine biosynthesis [catalytic activity : O3-acetyl-L-serine + H(2)S = L-cysteine + acetate]	C
NC_008611	MUL_0249	276	256802	C	G	SYN	S	S	1	two component sensor histidine kinase PrrB	Detected in the membrane fraction by proteomics (LC- MS/MS) membrane protein sensor part of the two component regulatory system PrrA/PrrB. thought to be involved in the environmental adaptation , specifically in an early phase of the intracellular growth.	G
NC_008611	MUL_0249	307	256833	G	A	NON	E	K	1	two component sensor histidine kinase PrrB	Detected in the membrane fraction by proteomics (LC- MS/MS) membrane protein sensor part of the two component regulatory system PrrA/PrrB. thought to be involved in the environmental adaptation , specifically in an early phase of the intracellular growth.	A
NC_008611	MUL_0252	870	258901	G	A	SYN	F	F	-1	outer membrane protein a OmpA	membrane protein the protein behaved as a porin of low specific activity. structural protein that may protect the integrity of the bacterium.	A
NC_008611	MUL_0252	302	259469	C	T	NON	G	E	-1	outer membrane protein a OmpA	membrane protein the protein behaved as a porin of low specific activity. structural protein that may protect the integrity of the bacterium.	T
NC_008611	MUL_0254	467	260636	A	G	NON	Y	C	1	oxidoreductase	cytoplasmic protein function unknown, probably involved in cellular metabolism.	G
NC_008611	MUL_0254	584	260753	T	C	NON	L	P	1	oxidoreductase	cytoplasmic protein function unknown, probably involved in cellular metabolism.	C
NC_008611	MUL_0254	695	260864	T	C	NON	M	T	1	oxidoreductase	cytoplasmic protein function unknown, probably involved in cellular metabolism.	C
NC_008611	MUL_0255	1038	262007	G	A	SYN	V	V	-1	citrate synthase I GltA2	Detected in the cytoplasmic and membrane fractions by proteomics. Also detected in the extracellular matrix by proteomics. cytoplasmic protein involved in tricarboxylic acid cycle (krebs cycle) [catalytic activity: citrate + CoA = acetyl-CoA + H2O + oxaloacetate]	A
NC_008611	MUL_0255	972	262073	C	T	SYN	E	E	-1	citrate synthase I GltA2	Detected in the cytoplasmic and membrane fractions by proteomics. Also detected in the extracellular matrix by proteomics. cytoplasmic protein involved in tricarboxylic acid cycle (krebs cycle) [catalytic activity: citrate + CoA = acetyl-CoA + H2O + oxaloacetate]	T
NC_008611	MUL_0256	620	264282	A	G	NON	L	P	-1	monooxygenase	Also detected in the cytoplamic fraction by LCMSMS membrane protein function unknown, probably involved in cellular metabolism.	G
NC_008611	MUL_0256	605	264297	C	G	NON	R	P	-1	monooxygenase	Also detected in the cytoplamic fraction by LCMSMS membrane protein function unknown, probably involved in cellular metabolism.	G
NC_008611	MUL_0263	4	273140	G	A	NON	A	T	1	hypothetical protein	Detected in the cytoplasmic and secreted fractions by 2D-LC-MS/MS. cytoplasmic protein	A
NC_008611	MUL_0263	358	273494	G	A	NON	V	I	1	hypothetical protein	Detected in the cytoplasmic and secreted fractions by 2D-LC-MS/MS. cytoplasmic protein	A
NC_008611	MUL_0278	1515	286731	T	C	SYN	K	K	-1	acyl-CoA dehydrogenase FadE10	cytoplasmic protein function unknown, but involved in lipid degradation.	C
NC_008611	MUL_0278	273	287973	T	G	SYN	A	A	-1	acyl-CoA dehydrogenase FadE10	cytoplasmic protein function unknown, but involved in lipid degradation.	G
NC_008611	MUL_0282	48	290544	G	C	SYN	A	A	1	molybdenum cofactor biosynthesis protein D 2 MoaD2	cytoplasmic protein involved in molybdenum cofactor biosynthesis.	C
NC_008611	MUL_0287	22	293752	T	C	NON	T	A	-1	hypothetical protein		C
NC_008611	MUL_0288	886	294721	G	A	NON	V	I	1	hypothetical protein		A
NC_008611	MUL_0289	459	296656	A	T	NON	E	D	1	DNA helicase Ercc3	cytoplasmic protein involved in nucleotide excision repair. has helicase activity: acts by opening DNA either around the RNA transcription start site or the DNA damage.	T
NC_008611	MUL_0289	777	296974	C	G	SYN	T	T	1	DNA helicase Ercc3	cytoplasmic protein involved in nucleotide excision repair. has helicase activity: acts by opening DNA either around the RNA transcription start site or the DNA damage.	G
NC_008611	MUL_0289	982	297179	G	A	NON	D	N	1	DNA helicase Ercc3	cytoplasmic protein involved in nucleotide excision repair. has helicase activity: acts by opening DNA either around the RNA transcription start site or the DNA damage.	A
NC_008611	MUL_0290	292	298084	G	T	NON	H	N	-1	hypothetical protein	cytoplasmic protein	T
NC_008611	MUL_0292	694	299278	C	A	NON	A	S	-1	hypothetical protein	Detected in the membrane fraction by proteomics (2D- LC-MS/MS) membrane protein function unknown, may have reductase activity	A
NC_008611	MUL_0292	567	299405	G	A	SYN	T	T	-1	hypothetical protein	Detected in the membrane fraction by proteomics (2D- LC-MS/MS) membrane protein function unknown, may have reductase activity	A
NC_008611	MUL_0292	234	299738	C	T	SYN	P	P	-1	hypothetical protein	Detected in the membrane fraction by proteomics (2D- LC-MS/MS) membrane protein function unknown, may have reductase activity	T
NC_008611	MUL_0294	212	300904	T	C	NON	I	T	1	membrane-associated oxidoreductase	Also detected in the cytoplasmic fraction. membrane protein	C
NC_008611	MUL_0294	631	301323	G	A	NON	D	N	1	membrane-associated oxidoreductase	Also detected in the cytoplasmic fraction. membrane protein	A
NC_008611	MUL_0295	2080	301984	T	C	NON	T	A	-1	fatty oxidation protein FadB	Detected in the membrane fraction by proteomics (LC- MS/MS) Also detected in the extracellular matrix by proteomics. membrane protein involved in fatty acid degradation (probably in fatty acid beta-oxidation cycle)
NC_008611	MUL_0295	1504	302560	G	C	NON	R	G	-1	fatty oxidation protein FadB	Detected in the membrane fraction by proteomics (LC- MS/MS) Also detected in the extracellular matrix by proteomics. membrane protein involved in fatty acid degradation (probably in fatty acid beta-oxidation cycle)
NC_008611	MUL_0295	1182	302882	C	G	SYN	A	A	-1	fatty oxidation protein FadB	Detected in the membrane fraction by proteomics (LC- MS/MS) Also detected in the extracellular matrix by proteomics. membrane protein involved in fatty acid degradation (probably in fatty acid beta-oxidation cycle)
NC_008611	MUL_0295	730	303334	A	G	SYN	L	L	-1	fatty oxidation protein FadB	Detected in the membrane fraction by proteomics (LC- MS/MS) Also detected in the extracellular matrix by proteomics. membrane protein involved in fatty acid degradation (probably in fatty acid beta-oxidation cycle)	G
NC_008611	MUL_0295	97	303967	C	T	NON	A	T	-1	fatty oxidation protein FadB	Detected in the membrane fraction by proteomics (LC- MS/MS) Also detected in the extracellular matrix by proteomics. membrane protein involved in fatty acid degradation (probably in fatty acid beta-oxidation cycle)	T
NC_008611	MUL_0296	656	304624	C	T	NON	G	D	-1	acyl-CoA thiolase FadA	Detected in the cytoplasmic fraction by proteomics (2D-LC-MS/MS) Also detected in the extracellular matrix and the membrane fraction by proteomics. membrane protein function unknown, but involvement in lipid degradation.	T
NC_008611	MUL_0296	58	305222	A	T	NON	Y	N	-1	acyl-CoA thiolase FadA	Detected in the cytoplasmic fraction by proteomics (2D-LC-MS/MS) Also detected in the extracellular matrix and the membrane fraction by proteomics. membrane protein function unknown, but involvement in lipid degradation.	T
NC_008611	MUL_0297	923	306406	T	C	NON	I	T	1	aminotransferase	cytoplasmic protein function unknown, probably involved in cellular metabolism.	C
NC_008611	MUL_0302	762	310062	G	A	SYN	G	G	1	pyruvate or indole-3-pyruvate decarboxylase Pdc	Detected in the membrane fraction by proteomics (2D- LC-MS/MS) membrane protein possible indole-3-pyruvate decarboxylase; [catalytic activity: 3-(indol-3-YL) pyruvate = 2-(indol-3- YL)acetaldehyde + CO2], or possible pyruvate decarboxylase; [catalytic activity: a 2-oxo acid = an aldehyde + CO2]	A
NC_008611	MUL_0308	548	315797	A	G	NON	V	A	-1	hypothetical protein	cytoplasmic protein function unknown, contains a hydrolytic domain.	G
NC_008611	MUL_0314	1030	319361	G	C	NON	R	G	-1	cytochrome P450 150A6 Cyp150A6	cytoplasmic protein cytochromes P450 are a group of heme-thiolate monooxygenases. they oxidize a variety of structurally unrelated compounds, including steroids, fatty acids, and xenobiotics.	C
NC_008611	MUL_0315	98	320771	C	G	NON	A	G	1	3-oxoacyl-[acyl-carrier protein] reductase, FabG2	membrane protein involved in the fatty acid biosynthesis [catalytic activity: (3R)-3-hydroxyacyl-[acyl-carrier protein] + NADP+ = 3-oxoacyl-[acyl-carrier protein] + NADPH]
NC_008611	MUL_0315	107	320780	C	T	NON	T	I	1	3-oxoacyl-[acyl-carrier protein] reductase, FabG2	membrane protein involved in the fatty acid biosynthesis [catalytic activity: (3R)-3-hydroxyacyl-[acyl-carrier protein] + NADP+ = 3-oxoacyl-[acyl-carrier protein] + NADPH]	T
NC_008611	MUL_0317	29	321757	G	A	NON	S	N	1	cytochrome P450 188A3 Cyp188A3	cytoplasmic protein cytochromes P450 are a group of heme-thiolate monooxygenases. they oxidize a variety of structurally unrelated compounds, including steroids, fatty acids, and xenobiotics.
NC_008611	MUL_0317	122	321850	G	A	NON	C	Y	1	cytochrome P450 188A3 Cyp188A3	cytoplasmic protein cytochromes P450 are a group of heme-thiolate monooxygenases. they oxidize a variety of structurally unrelated compounds, including steroids, fatty acids, and xenobiotics.	A
NC_008611	MUL_0317	681	322409	G	C	SYN	A	A	1	cytochrome P450 188A3 Cyp188A3	cytoplasmic protein cytochromes P450 are a group of heme-thiolate monooxygenases. they oxidize a variety of structurally unrelated compounds, including steroids, fatty acids, and xenobiotics.	C
NC_008611	MUL_0317	1005	322733	G	C	NON	E	D	1	cytochrome P450 188A3 Cyp188A3	cytoplasmic protein cytochromes P450 are a group of heme-thiolate monooxygenases. they oxidize a variety of structurally unrelated compounds, including steroids, fatty acids, and xenobiotics.	C
NC_008611	MUL_0321	1506	326459	C	T	SYN	R	R	-1	integral membrane transporter	membrane protein function unknown, possibly involved in transport of sulfate across the membrane.	T
NC_008611	MUL_0321	1294	326671	A	C	NON	C	G	-1	integral membrane transporter	membrane protein function unknown, possibly involved in transport of sulfate across the membrane.	C
NC_008611	MUL_0321	916	327049	G	A	NON	P	S	-1	integral membrane transporter	membrane protein function unknown, possibly involved in transport of sulfate across the membrane.	A
NC_008611	MUL_0322	392	329061	C	A	NON	S	I	-1	acyl-CoA dehydrogenase	cytoplasmic protein function unknown, but supposed involvement in lipid degradation.	A
NC_008611	MUL_0322	48	329405	G	T	NON	F	L	-1	acyl-CoA dehydrogenase	cytoplasmic protein function unknown, but supposed involvement in lipid degradation.	T
NC_008611	MUL_0328	2382	334324	G	A	SYN	S	S	-1	acyl-CoA transferase	cytoplasmic protein	A
NC_008611	MUL_0328	1406	335300	C	A	NON	G	V	-1	acyl-CoA transferase	cytoplasmic protein	A
NC_008611	MUL_0328	1392	335314	C	G	SYN	T	T	-1	acyl-CoA transferase	cytoplasmic protein	G
NC_008611	MUL_0328	1326	335380	G	A	SYN	I	I	-1	acyl-CoA transferase	cytoplasmic protein	A
NC_008611	MUL_0328	1126	335580	A	C	NON	Y	D	-1	acyl-CoA transferase	cytoplasmic protein	C
NC_008611	MUL_0328	633	336073	C	G	SYN	S	S	-1	acyl-CoA transferase	cytoplasmic protein	G
NC_008611	MUL_0333	1189	341318	G	A	NON	P	S	-1	cytochrome P450 105Q4 Cyp105Q4	cytoplasmic protein cytochromes P450 are a group of heme-thiolate monooxygenases. they oxidize a variety of structurally unrelated compounds, including steroids, fatty acids, and xenobiotics.	A
NC_008611	MUL_0333	404	342103	G	A	NON	T	I	-1	cytochrome P450 105Q4 Cyp105Q4	cytoplasmic protein cytochromes P450 are a group of heme-thiolate monooxygenases. they oxidize a variety of structurally unrelated compounds, including steroids, fatty acids, and xenobiotics.	A
NC_008611	MUL_0333	235	342272	C	G	NON	V	L	-1	cytochrome P450 105Q4 Cyp105Q4	cytoplasmic protein cytochromes P450 are a group of heme-thiolate monooxygenases. they oxidize a variety of structurally unrelated compounds, including steroids, fatty acids, and xenobiotics.	G
NC_008611	MUL_0333	173	342334	A	G	NON	I	T	-1	cytochrome P450 105Q4 Cyp105Q4	cytoplasmic protein cytochromes P450 are a group of heme-thiolate monooxygenases. they oxidize a variety of structurally unrelated compounds, including steroids, fatty acids, and xenobiotics.	G
NC_008611	MUL_0333	160	342347	C	T	NON	A	T	-1	cytochrome P450 105Q4 Cyp105Q4	cytoplasmic protein cytochromes P450 are a group of heme-thiolate monooxygenases. they oxidize a variety of structurally unrelated compounds, including steroids, fatty acids, and xenobiotics.	T
NC_008611	MUL_0333	144	342363	T	G	SYN	R	R	-1	cytochrome P450 105Q4 Cyp105Q4	cytoplasmic protein cytochromes P450 are a group of heme-thiolate monooxygenases. they oxidize a variety of structurally unrelated compounds, including steroids, fatty acids, and xenobiotics.	G
NC_008611	MUL_0335	330	343052	C	A	SYN	L	L	-1	hypothetical protein	cytoplasmic protein function unknown, maybe a transcriptional regulator	A
NC_008611	MUL_0336	98	344177	C	G	NON	R	P	-1	short chain dehydrogenase	cytoplasmic protein	G
NC_008611	MUL_0338	748	345806	A	C	NON	L	V	-1	conserved integral membrane transport protein	membrane protein thought to be involved in transport of undeterminated substrate (possibly drug) across the membrane. responsible for the translocation of the substrate across the membrane.	C
NC_008611	MUL_0338	243	346311	G	A	SYN	I	I	-1	conserved integral membrane transport protein	membrane protein thought to be involved in transport of undeterminated substrate (possibly drug) across the membrane. responsible for the translocation of the substrate across the membrane.	A
NC_008611	MUL_0345	918	353144	G	A	SYN	I	I	-1	monoxygenase	cytoplasmic protein	A
NC_008611	MUL_0351	172	361247	G	A	NON	A	T	1	nitrate/nitrite response regulator protein NarL	cytoplasmic protein	A
NC_008611	MUL_0354	1283	364590	A	G	NON	V	A	-1	integral membrane protein	membrane protein	G
NC_008611	MUL_0354	905	364968	T	C	NON	H	R	-1	integral membrane protein	membrane protein
NC_008611	MUL_0360	857	370241	A	G	NON	I	T	-1	acyl-CoA dehydrogenase	cytoplasmic protein involved in lipid metabolism.	G
NC_008611	MUL_0360	603	370495	C	G	NON	E	D	-1	acyl-CoA dehydrogenase	cytoplasmic protein involved in lipid metabolism.	G
NC_008611	MUL_0367	1028	376972	T	C	NON	E	G	-1	methylmalonyl-CoA mutase beta subunit, McmA2a	cytoplasmic protein catalyzes the isomerization of succinyl-CoA to methylmalonyl-CoA during synthesis of propionate from tricarboxylic acid-cycle intermediates [catalytic activity : (R)-2-methyl-3-oxopropanoyl-CoA = succinyl- CoA] the enzyme methylmalonyl-CoA mutase is a member of a class of enzymes that uses coenzyme B12 (adenosylcobalamin) as a cofactor. the enzyme induces the formation of an a…
NC_008611	MUL_0367	349	377651	G	A	NON	L	F	-1	methylmalonyl-CoA mutase beta subunit, McmA2a	cytoplasmic protein catalyzes the isomerization of succinyl-CoA to methylmalonyl-CoA during synthesis of propionate from tricarboxylic acid-cycle intermediates [catalytic activity : (R)-2-methyl-3-oxopropanoyl-CoA = succinyl- CoA] the enzyme methylmalonyl-CoA mutase is a member of a class of enzymes that uses coenzyme B12 (adenosylcobalamin) as a cofactor. the enzyme induces the formation of an a…	A
NC_008611	MUL_0368	774	378164	C	G	NON	W	C	-1	hypothetical protein	cytoplasmic protein possible methylase	G
NC_008611	MUL_0368	273	378665	C	G	SYN	V	V	-1	hypothetical protein	cytoplasmic protein possible methylase	G
NC_008611	MUL_0368	232	378706	G	C	NON	L	V	-1	hypothetical protein	cytoplasmic protein possible methylase	C
NC_008611	MUL_0379	102	390570	A	C	SYN	V	V	1	marR-family transcriptional regulator	cytoplasmic protein involved in transcriptional mechanism.	C
NC_008611	MUL_0389	953	400381	C	G	NON	A	G	1	hypothetical protein	cytoplasmic protein contains amidohydrolase domain	G
NC_008611	MUL_0403	433	415935	G	C	NON	P	A	-1	hypothetical protein	cytoplasmic protein contains mannose-6-phosphate isomerase [carbohydrate transport and metabolism]	C
NC_008611	MUL_0404	1020	416906	G	A	SYN	D	D	-1	dihydrolipoamide dehydrogenase, LpdB	cytoplasmic protein contains pyruvate/2-oxoglutarate dehydrogenase complex, dihydrolipoamide dehydrogenase (E3) component domain	A
NC_008611	MUL_0404	654	417272	C	T	NON	M	I	-1	dihydrolipoamide dehydrogenase, LpdB	cytoplasmic protein contains pyruvate/2-oxoglutarate dehydrogenase complex, dihydrolipoamide dehydrogenase (E3) component domain	T
NC_008611	MUL_0404	451	417475	T	C	NON	I	V	-1	dihydrolipoamide dehydrogenase, LpdB	cytoplasmic protein contains pyruvate/2-oxoglutarate dehydrogenase complex, dihydrolipoamide dehydrogenase (E3) component domain	C
NC_008611	MUL_0409	382	422275	A	C	NON	S	A	-1	hypothetical protein	cytoplasmic protein domain similarity with acetyltransferases	C
NC_008611	MUL_0410	612	423365	T	C	SYN	G	G	1	phosphoribosylformylglycinamidine synthase II, PurL	Detected in the membrane fraction by proteomics membrane protein	C
NC_008611	MUL_0410	856	423609	G	A	NON	V	M	1	phosphoribosylformylglycinamidine synthase II, PurL	Detected in the membrane fraction by proteomics membrane protein	A
NC_008611	MUL_0417	701	432121	A	G	NON	D	G	1	amidophosphoribosyltransferase, PurF	cytoplasmic protein involved in de novo purine biosynthesis (at the first step) [catalytic activity: 5-phospho-beta-D- ribosylamine + diphosphate + L-glutamate = L-glutamine + 5- phospho-alpha-D-ribose 1-diphosphate + H2O]	G
NC_008611	MUL_0417	1155	432575	C	T	SYN	I	I	1	amidophosphoribosyltransferase, PurF	cytoplasmic protein involved in de novo purine biosynthesis (at the first step) [catalytic activity: 5-phospho-beta-D- ribosylamine + diphosphate + L-glutamate = L-glutamine + 5- phospho-alpha-D-ribose 1-diphosphate + H2O]	T
NC_008611	MUL_0417	1182	432602	C	G	NON	D	E	1	amidophosphoribosyltransferase, PurF	cytoplasmic protein involved in de novo purine biosynthesis (at the first step) [catalytic activity: 5-phospho-beta-D- ribosylamine + diphosphate + L-glutamate = L-glutamine + 5- phospho-alpha-D-ribose 1-diphosphate + H2O]	G
NC_008611	MUL_0417	1193	432613	C	G	NON	A	G	1	amidophosphoribosyltransferase, PurF	cytoplasmic protein involved in de novo purine biosynthesis (at the first step) [catalytic activity: 5-phospho-beta-D- ribosylamine + diphosphate + L-glutamate = L-glutamine + 5- phospho-alpha-D-ribose 1-diphosphate + H2O]	G
NC_008611	MUL_0418	100	433164	G	T	NON	G	C	1	5'-phosphoribosyl-5-aminoimidazole synthetase, PurM	Detected in the cytoplasmic fraction by 2D-LC- MS/MS. cytoplasmic protein involved in de novo purine biosynthesis (at the fifth step) [catalytic activity: ATP + 5'- phosphoribosylformylglycinamidine = ADP + phosphate + 5'- phosphoribosyl-5-aminoimidazole]	T
NC_008611	MUL_0420	291	435418	G	A	SYN	Y	Y	-1	hypothetical protein	cytoplasmic protein contains predicted aminomethyltransferase domain, related to GcvT - involved in the catabolism of glycine	A
NC_008611	MUL_0423	1016	437661	C	G	NON	G	A	-1	metal cation transporter p-type ATPase, CtpV	membrane protein metal cation-transporting ATPase; possibly catalyzes the transport of undetermined metal cation with hydrolyse of ATP [catalytic activity: ATP + H(2)O + undetermined metal cation(in) = ADP + phosphate + undetermined metal cation (out)]
NC_008611	MUL_0423	1006	437671	A	G	NON	W	R	-1	metal cation transporter p-type ATPase, CtpV	membrane protein metal cation-transporting ATPase; possibly catalyzes the transport of undetermined metal cation with hydrolyse of ATP [catalytic activity: ATP + H(2)O + undetermined metal cation(in) = ADP + phosphate + undetermined metal cation (out)]	G
NC_008611	MUL_0423	1004	437673	T	C	NON	D	G	-1	metal cation transporter p-type ATPase, CtpV	membrane protein metal cation-transporting ATPase; possibly catalyzes the transport of undetermined metal cation with hydrolyse of ATP [catalytic activity: ATP + H(2)O + undetermined metal cation(in) = ADP + phosphate + undetermined metal cation (out)]
NC_008611	MUL_0423	820	437857	T	C	NON	T	A	-1	metal cation transporter p-type ATPase, CtpV	membrane protein metal cation-transporting ATPase; possibly catalyzes the transport of undetermined metal cation with hydrolyse of ATP [catalytic activity: ATP + H(2)O + undetermined metal cation(in) = ADP + phosphate + undetermined metal cation (out)]	C
NC_008611	MUL_0423	804	437873	G	C	NON	D	E	-1	metal cation transporter p-type ATPase, CtpV	membrane protein metal cation-transporting ATPase; possibly catalyzes the transport of undetermined metal cation with hydrolyse of ATP [catalytic activity: ATP + H(2)O + undetermined metal cation(in) = ADP + phosphate + undetermined metal cation (out)]	C
NC_008611	MUL_0423	132	438545	G	A	SYN	Y	Y	-1	metal cation transporter p-type ATPase, CtpV	membrane protein metal cation-transporting ATPase; possibly catalyzes the transport of undetermined metal cation with hydrolyse of ATP [catalytic activity: ATP + H(2)O + undetermined metal cation(in) = ADP + phosphate + undetermined metal cation (out)]	A
NC_008611	MUL_0424	67	438974	C	T	NON	A	T	-1	hypothetical protein	cytoplasmic protein	T
NC_008611	MUL_0425	349	439180	T	C	NON	K	E	-1	hypothetical protein	cytoplasmic protein	C
NC_008611	MUL_0426	639	440268	C	T	SYN	P	P	1	amino acid aminotransferase, PabC	cytoplasmic protein class-IV of pyridoxal-phosphate-dependent aminotransferases
NC_008611	MUL_0429	244	443616	C	G	NON	E	Q	-1	hypothetical protein	cytoplasmic protein N-terminal truncated in relation to orthologs	G
NC_008611	MUL_0429	44	443816	A	G	NON	L	P	-1	hypothetical protein	cytoplasmic protein N-terminal truncated in relation to orthologs
NC_008611	MUL_0429	37	443823	A	G	SYN	L	L	-1	hypothetical protein	cytoplasmic protein N-terminal truncated in relation to orthologs	G
NC_008611	MUL_0432	614	444630	G	A	NON	A	V	-1	thiosulfate sulfurtransferase, CysA2	Also detected in the membrane fraction by proteomics. cytoplasmic protein may be a sulfotransferase involved in the formation of thiosulfate [catalytic activity: thiosulfate + cyanide = sulfite + thiocyanate]	A
NC_008611	MUL_0439	124	451442	C	G	NON	P	A	1	phosphate-transport integral membrane ABC transporter, PstA	membrane protein nvolved in active transport of inorganic phosphate across the membrane (import); responsible for the translocation of the substrate across the membrane. this is one of the proteins required for binding-protein- mediated phosphate transport.
NC_008611	MUL_0439	433	451751	T	C	NON	W	R	1	phosphate-transport integral membrane ABC transporter, PstA	membrane protein nvolved in active transport of inorganic phosphate across the membrane (import); responsible for the translocation of the substrate across the membrane. this is one of the proteins required for binding-protein- mediated phosphate transport.	C
NC_008611	MUL_0444	100	457208	C	G	NON	E	Q	-1	transcriptional regulator	cytoplasmic protein domain homology - tRNA-dihydrouridine synthase [translation, ribosomal structure and biogenesis]	G
NC_008611	MUL_0446	282	458860	T	C	SYN	V	V	-1	hypothetical protein	membrane protein	C
NC_008611	MUL_0446	212	458930	G	A	NON	A	V	-1	hypothetical protein	membrane protein	A
NC_008611	MUL_0447	767	459981	T	C	NON	V	A	1	hypothetical protein	cytoplasmic protein	C
NC_008611	MUL_0450	808	462123	A	G	NON	K	E	1	O-methyltransferase	membrane protein function unknown, may be involved in polyketide biosynthesis [secondary metabolites biosynthesis, transport, and catabolism]	G
NC_008611	MUL_0454	46	465521	G	A	NON	E	K	1	arylsulfatase AtsD	membrane protein thought to play an important role in the mineralization of sulfates [catalytic activity: a phenol sulfate + H2O = a phenol + sulfate]	A
NC_008611	MUL_0454	245	465720	C	A	NON	P	Q	1	arylsulfatase AtsD	membrane protein thought to play an important role in the mineralization of sulfates [catalytic activity: a phenol sulfate + H2O = a phenol + sulfate]	A
NC_008611	MUL_0454	617	466092	G	C	NON	W	S	1	arylsulfatase AtsD	membrane protein thought to play an important role in the mineralization of sulfates [catalytic activity: a phenol sulfate + H2O = a phenol + sulfate]
NC_008611	MUL_0454	1337	466812	A	G	NON	N	S	1	arylsulfatase AtsD	membrane protein thought to play an important role in the mineralization of sulfates [catalytic activity: a phenol sulfate + H2O = a phenol + sulfate]	G
NC_008611	MUL_0454	1477	466952	G	A	NON	D	N	1	arylsulfatase AtsD	membrane protein thought to play an important role in the mineralization of sulfates [catalytic activity: a phenol sulfate + H2O = a phenol + sulfate]	A
NC_008611	MUL_0454	1490	466965	C	A	NON	P	H	1	arylsulfatase AtsD	membrane protein thought to play an important role in the mineralization of sulfates [catalytic activity: a phenol sulfate + H2O = a phenol + sulfate]	A
NC_008611	MUL_0454	1660	467135	C	G	NON	R	G	1	arylsulfatase AtsD	membrane protein thought to play an important role in the mineralization of sulfates [catalytic activity: a phenol sulfate + H2O = a phenol + sulfate]
NC_008611	MUL_0454	2056	467531	C	G	NON	L	V	1	arylsulfatase AtsD	membrane protein thought to play an important role in the mineralization of sulfates [catalytic activity: a phenol sulfate + H2O = a phenol + sulfate]	G
NC_008611	MUL_0454	2438	467913	A	G	NON	D	G	1	arylsulfatase AtsD	membrane protein thought to play an important role in the mineralization of sulfates [catalytic activity: a phenol sulfate + H2O = a phenol + sulfate]
NC_008611	MUL_0460	701	474559	C	T	NON	R	H	-1	hypothetical protein	cytoplasmic protein function unknown, contains a UbiH domain, 2- polyprenyl-6-methoxyphenol hydroxylase and related FAD- dependent oxidoreductases [coenzyme metabolism / energy production and conversion]	T
NC_008611	MUL_0460	354	474906	G	C	NON	D	E	-1	hypothetical protein	cytoplasmic protein function unknown, contains a UbiH domain, 2- polyprenyl-6-methoxyphenol hydroxylase and related FAD- dependent oxidoreductases [coenzyme metabolism / energy production and conversion]	C
NC_008611	MUL_0460	131	475129	A	G	NON	V	A	-1	hypothetical protein	cytoplasmic protein function unknown, contains a UbiH domain, 2- polyprenyl-6-methoxyphenol hydroxylase and related FAD- dependent oxidoreductases [coenzyme metabolism / energy production and conversion]	G
NC_008611	MUL_0469	193	482855	G	C	NON	H	D	-1	hypothetical protein	cytoplasmic protein function unknown, domain homology suggests possible NADH:flavin oxidoreductase	C
NC_008611	MUL_0469	80	482968	A	G	NON	M	T	-1	hypothetical protein	cytoplasmic protein function unknown, domain homology suggests possible NADH:flavin oxidoreductase	G
NC_008611	MUL_0470	1005	483200	G	C	NON	N	K	-1	zinc-containing alcohol dehydrogenase NAD- dependent AdhB	membrane protein thought to catalyze the reversible oxidation of ethanol to acetaldehyde with the concomitant reduction of NAD. probably acts on primary or secondary alcohols or hemiacetals [catalytic activity: an alcohol + NAD+ = an aldehyde or ketone + NADH]	C
NC_008611	MUL_0470	978	483227	G	T	NON	H	Q	-1	zinc-containing alcohol dehydrogenase NAD- dependent AdhB	membrane protein thought to catalyze the reversible oxidation of ethanol to acetaldehyde with the concomitant reduction of NAD. probably acts on primary or secondary alcohols or hemiacetals [catalytic activity: an alcohol + NAD+ = an aldehyde or ketone + NADH]	T
NC_008611	MUL_0470	775	483430	T	C	NON	M	V	-1	zinc-containing alcohol dehydrogenase NAD- dependent AdhB	membrane protein thought to catalyze the reversible oxidation of ethanol to acetaldehyde with the concomitant reduction of NAD. probably acts on primary or secondary alcohols or hemiacetals [catalytic activity: an alcohol + NAD+ = an aldehyde or ketone + NADH]	C
NC_008611	MUL_0470	82	484123	C	T	NON	D	N	-1	zinc-containing alcohol dehydrogenase NAD- dependent AdhB	membrane protein thought to catalyze the reversible oxidation of ethanol to acetaldehyde with the concomitant reduction of NAD. probably acts on primary or secondary alcohols or hemiacetals [catalytic activity: an alcohol + NAD+ = an aldehyde or ketone + NADH]	T
NC_008611	MUL_0482	1344	494497	T	G	SYN	A	A	-1	serine/threonine-protein kinase PknF_2	membrane protein involved in signal transduction (via phosphorylation) [catalytic activity: ATP + a protein = ADP + a phosphoprotein]	C
NC_008611	MUL_0482	1308	494533	C	G	NON	E	D	-1	serine/threonine-protein kinase PknF_2	membrane protein involved in signal transduction (via phosphorylation) [catalytic activity: ATP + a protein = ADP + a phosphoprotein]	G
NC_008611	MUL_0482	1188	494653	C	A	SYN	P	P	-1	serine/threonine-protein kinase PknF_2	membrane protein involved in signal transduction (via phosphorylation) [catalytic activity: ATP + a protein = ADP + a phosphoprotein]	A
NC_008611	MUL_0482	27	495814	T	A	SYN	G	G	-1	serine/threonine-protein kinase PknF_2	membrane protein involved in signal transduction (via phosphorylation) [catalytic activity: ATP + a protein = ADP + a phosphoprotein]
NC_008611	MUL_0486	1223	501306	T	C	NON	E	G	-1	bifunctional acylase, GgtA	cytoplasmic protein besides the cephalosporin acylase I activity which converts GL-7ACA into 7-Aca; this enzyme displays some gamma glutamyltranspeptidase activity: Ggt plays a key role in the gamma-glutamyl cycle, a pathway for the synthesis and degradation of glutathione. [catalytic activity 1: 7-beta-(4-carboxybutanamido)-cephalosporanic acid + H2O = 7-aminocephalosporanic acid + glutaric acid…	C
NC_008611	MUL_0486	594	501935	C	T	SYN	P	P	-1	bifunctional acylase, GgtA	cytoplasmic protein besides the cephalosporin acylase I activity which converts GL-7ACA into 7-Aca; this enzyme displays some gamma glutamyltranspeptidase activity: Ggt plays a key role in the gamma-glutamyl cycle, a pathway for the synthesis and degradation of glutathione. [catalytic activity 1: 7-beta-(4-carboxybutanamido)-cephalosporanic acid + H2O = 7-aminocephalosporanic acid + glutaric acid…	T
NC_008611	MUL_0486	43	502486	C	T	NON	A	T	-1	bifunctional acylase, GgtA	cytoplasmic protein besides the cephalosporin acylase I activity which converts GL-7ACA into 7-Aca; this enzyme displays some gamma glutamyltranspeptidase activity: Ggt plays a key role in the gamma-glutamyl cycle, a pathway for the synthesis and degradation of glutathione. [catalytic activity 1: 7-beta-(4-carboxybutanamido)-cephalosporanic acid + H2O = 7-aminocephalosporanic acid + glutaric acid…	T
NC_008611	MUL_0489	112	504813	T	C	NON	T	A	-1	hypothetical protein	cytoplasmic protein	C
NC_008611	MUL_0540	253	548966	T	C	NON	S	P	1	amidase, AmiC_2	Detected in the membrane fraction by proteomics (2D- LC-MS/MS) membrane protein hydrolyzes a monocarboxylic acid amide and generates a monocarboxylate [catalytic activity: a monocarboxylic acid amide + H(2)O = a monocarboxylate + NH(3)]	C
NC_008611	MUL_0544	704	554535	C	T	NON	S	F	1	dehydrogenase	membrane protein	T
NC_008611	MUL_0545	37	554640	G	A	NON	V	M	1	hydrolase	cytoplasmic protein	A
NC_008611	MUL_0548	232	557614	G	A	NON	D	N	1	epimerase	membrane protein	A
NC_008611	MUL_0549	280	558552	C	T	SYN	L	L	1	hypothetical protein	cytoplasmic protein	T
NC_008611	MUL_0549	478	558750	C	T	NON	L	F	1	hypothetical protein	cytoplasmic protein	T
NC_008611	MUL_5123	87	559374	C	T	SYN	Q	Q	-1	hypothetical protein	cytoplasmic protein	T
NC_008611	MUL_0552	355	561359	G	C	NON	L	V	-1	hypothetical protein	cytoplasmic protein	C
NC_008611	MUL_0556	302	564719	T	C	NON	V	A	1	hypothetical protein	cytoplasmic protein	C
NC_008611	MUL_0566	59	571861	G	A	NON	G	D	1	hypothetical protein	cytoplasmic protein	A
NC_008611	MUL_0566	73	571875	G	A	NON	A	T	1	hypothetical protein	cytoplasmic protein	A
NC_008611	MUL_0566	172	571974	A	G	NON	N	D	1	hypothetical protein	cytoplasmic protein	G
NC_008611	MUL_0566	372	572174	C	G	SYN	V	V	1	hypothetical protein	cytoplasmic protein	G
NC_008611	MUL_0569	180	574750	G	C	NON	H	Q	-1	PE_PGRS family protein	membrane protein function unknown. seems to influence both cell surface interactions among mycobacteria and the interactions of the bacteria with macrophages.	C
NC_008611	MUL_0570	180	575978	C	T	SYN	Q	Q	-1	PE_PGRS family protein	membrane protein	T
NC_008611	MUL_0579	2199	593382	G	C	NON	Q	H	1	conserved hypothetical membrane protein, IniB	membrane protein function unknown function but ortholog in M.tuberculosis induced by isoniazid and ethionamide.	C
NC_008611	MUL_0582	727	598570	A	G	SYN	L	L	-1	hypothetical protein	membrane protein	G
NC_008611	MUL_0589	348	605465	C	T	SYN	R	R	1	hypothetical protein	membrane protein	T
NC_008611	MUL_0593	102	608184	A	G	SYN	R	R	1	chaperone protein DnaK	Also detected in the extracellular matrix and membrane fraction by proteomics. cytoplasmic protein acts as a chaperone. involved in induction by stress conditions E.G. heat shock. has ATPase activity. seems to be regulated positively by SigH and negatively by HspR.	G
NC_008611	MUL_0593	684	608766	G	A	SYN	K	K	1	chaperone protein DnaK	Also detected in the extracellular matrix and membrane fraction by proteomics. cytoplasmic protein acts as a chaperone. involved in induction by stress conditions E.G. heat shock. has ATPase activity. seems to be regulated positively by SigH and negatively by HspR.	A
NC_008611	MUL_0593	723	608805	C	T	SYN	A	A	1	chaperone protein DnaK	Also detected in the extracellular matrix and membrane fraction by proteomics. cytoplasmic protein acts as a chaperone. involved in induction by stress conditions E.G. heat shock. has ATPase activity. seems to be regulated positively by SigH and negatively by HspR.	T
NC_008611	MUL_0593	1320	609402	A	G	SYN	P	P	1	chaperone protein DnaK	Also detected in the extracellular matrix and membrane fraction by proteomics. cytoplasmic protein acts as a chaperone. involved in induction by stress conditions E.G. heat shock. has ATPase activity. seems to be regulated positively by SigH and negatively by HspR.	G
NC_008611	MUL_0593	1322	609404	G	C	NON	R	P	1	chaperone protein DnaK	Also detected in the extracellular matrix and membrane fraction by proteomics. cytoplasmic protein acts as a chaperone. involved in induction by stress conditions E.G. heat shock. has ATPase activity. seems to be regulated positively by SigH and negatively by HspR.
NC_008611	MUL_0595	195	610853	A	G	SYN	P	P	1	chaperone protein, DnaJ	Detected in the cytoplasmic fraction by 2D-LC- MS/MS. cytoplasmic protein acts as a co-chaperone. stimulates, jointly with GrpE, the ATPase activity of DnaK. seems to be regulated negatively by HspR.	G
NC_008611	MUL_0595	518	611176	T	C	NON	I	T	1	chaperone protein, DnaJ	Detected in the cytoplasmic fraction by 2D-LC- MS/MS. cytoplasmic protein acts as a co-chaperone. stimulates, jointly with GrpE, the ATPase activity of DnaK. seems to be regulated negatively by HspR.	C
NC_008611	MUL_0604	734	623122	C	T	NON	G	D	-1	cytochrome P450 185A4 Cyp185A4	cytoplasmic protein cytochromes P450 are a group of heme-thiolate monooxygenases. they oxidize a variety of structurally unrelated compounds, including steroids, fatty acids, and xenobiotics. some have been shown to bind tightly to a range of azole-based antifungal drugs (E.G. miconazole, clotrimazole)	T
NC_008611	MUL_0604	617	623239	G	C	NON	P	R	-1	cytochrome P450 185A4 Cyp185A4	cytoplasmic protein cytochromes P450 are a group of heme-thiolate monooxygenases. they oxidize a variety of structurally unrelated compounds, including steroids, fatty acids, and xenobiotics. some have been shown to bind tightly to a range of azole-based antifungal drugs (E.G. miconazole, clotrimazole)	C
NC_008611	MUL_0604	608	623248	G	A	NON	P	L	-1	cytochrome P450 185A4 Cyp185A4	cytoplasmic protein cytochromes P450 are a group of heme-thiolate monooxygenases. they oxidize a variety of structurally unrelated compounds, including steroids, fatty acids, and xenobiotics. some have been shown to bind tightly to a range of azole-based antifungal drugs (E.G. miconazole, clotrimazole)	A
NC_008611	MUL_0604	16	623840	C	T	NON	D	N	-1	cytochrome P450 185A4 Cyp185A4	cytoplasmic protein cytochromes P450 are a group of heme-thiolate monooxygenases. they oxidize a variety of structurally unrelated compounds, including steroids, fatty acids, and xenobiotics. some have been shown to bind tightly to a range of azole-based antifungal drugs (E.G. miconazole, clotrimazole)	T
NC_008611	MUL_0612	366	632640	T	C	SYN	T	T	1	metal cation-transporting p-type ATPase F, CtpF	Detected in the membrane fraction by proteomics (LC- MS/MS) membrane protein metal cation-transporting ATPase; possibly catalyzes the transport of a undeterminated metal cation with the hydrolyse of ATP [catalytic activity: ATP + H(2)O + undetermined metal cation(in) = ADP + phosphate + undetermined metal cation(out)	C
NC_008611	MUL_0612	950	633224	A	G	NON	H	R	1	metal cation-transporting p-type ATPase F, CtpF	Detected in the membrane fraction by proteomics (LC- MS/MS) membrane protein metal cation-transporting ATPase; possibly catalyzes the transport of a undeterminated metal cation with the hydrolyse of ATP [catalytic activity: ATP + H(2)O + undetermined metal cation(in) = ADP + phosphate + undetermined metal cation(out)	G
NC_008611	MUL_0612	1036	633310	G	C	NON	E	Q	1	metal cation-transporting p-type ATPase F, CtpF	Detected in the membrane fraction by proteomics (LC- MS/MS) membrane protein metal cation-transporting ATPase; possibly catalyzes the transport of a undeterminated metal cation with the hydrolyse of ATP [catalytic activity: ATP + H(2)O + undetermined metal cation(in) = ADP + phosphate + undetermined metal cation(out)	C
NC_008611	MUL_0612	2352	634626	C	G	SYN	L	L	1	metal cation-transporting p-type ATPase F, CtpF	Detected in the membrane fraction by proteomics (LC- MS/MS) membrane protein metal cation-transporting ATPase; possibly catalyzes the transport of a undeterminated metal cation with the hydrolyse of ATP [catalytic activity: ATP + H(2)O + undetermined metal cation(in) = ADP + phosphate + undetermined metal cation(out)	G
NC_008611	MUL_0665	18	686879	C	T	SYN	H	H	1	peptidase heat shock protein X, HspX	membrane protein possibly involved in adaptation. hydrolizes specific peptides and/or proteins.	T
NC_008611	MUL_0665	115	686976	G	A	NON	V	M	1	peptidase heat shock protein X, HspX	membrane protein possibly involved in adaptation. hydrolizes specific peptides and/or proteins.	A
NC_008611	MUL_0665	540	687401	C	G	SYN	P	P	1	peptidase heat shock protein X, HspX	membrane protein possibly involved in adaptation. hydrolizes specific peptides and/or proteins.	G
NC_008611	MUL_0670	33	697728	C	T	SYN	V	V	-1	acetyltransferase, RimL	cytoplasmic protein domain identity to N-acetylases of ribosomal proteins	T
NC_008611	MUL_0677	918	703702	C	T	SYN	R	R	-1	ion antiporter, NhaP	membrane protein NhaP-type Na+/H+ and K+/H+ antiporter: inorganic ion transport and metabolism] antiporters are ubiquitous membrane proteins that are involved in homeostasis of H(+) and na(+) throughout the biological kingdom.	T
NC_008611	MUL_0677	710	703910	C	G	NON	R	P	-1	ion antiporter, NhaP	membrane protein NhaP-type Na+/H+ and K+/H+ antiporter: inorganic ion transport and metabolism] antiporters are ubiquitous membrane proteins that are involved in homeostasis of H(+) and na(+) throughout the biological kingdom.	G
NC_008611	MUL_0677	677	703943	G	A	NON	A	V	-1	ion antiporter, NhaP	membrane protein NhaP-type Na+/H+ and K+/H+ antiporter: inorganic ion transport and metabolism] antiporters are ubiquitous membrane proteins that are involved in homeostasis of H(+) and na(+) throughout the biological kingdom.	A
NC_008611	MUL_0686	573	711776	G	C	SYN	A	A	1	methyltransferase/methylase	cytoplasmic protein	C
NC_008611	MUL_0687	231	712597	C	G	SYN	A	A	1	adenylate cyclase	cytoplasmic protein	G
NC_008611	MUL_0687	538	712904	A	C	NON	I	L	1	adenylate cyclase	cytoplasmic protein	C
NC_008611	MUL_0687	545	712911	A	T	NON	D	V	1	adenylate cyclase	cytoplasmic protein	T
NC_008611	MUL_0700	1126	730886	A	G	SYN	L	L	-1	conserved lipoprotein, LppF	membrane protein	G
NC_008611	MUL_0700	581	731431	G	C	NON	T	S	-1	conserved lipoprotein, LppF	membrane protein	C
NC_008611	MUL_0714	661	752587	C	T	NON	E	K	-1	hypothetical protein	membrane protein	T
NC_008611	MUL_0740	1849	778222	C	G	NON	H	D	1	PE-PGRS family protein	membrane protein
NC_008611	MUL_0742	33	779445	G	C	NON	E	D	1	50S ribosomal protein L7/L12, RplL	Detected in the cytoplamic fraction by LC-MS/MS. cytoplasmic protein involved in translation mechanisms: seems to be the binding site for several of the factors involved in protein synthesis and appears to be essential for accurate translation	C
NC_008611	MUL_0742	44	779456	G	A	NON	G	E	1	50S ribosomal protein L7/L12, RplL	Detected in the cytoplamic fraction by LC-MS/MS. cytoplasmic protein involved in translation mechanisms: seems to be the binding site for several of the factors involved in protein synthesis and appears to be essential for accurate translation	A
NC_008611	MUL_0742	266	779678	G	T	NON	G	V	1	50S ribosomal protein L7/L12, RplL	Detected in the cytoplamic fraction by LC-MS/MS. cytoplasmic protein involved in translation mechanisms: seems to be the binding site for several of the factors involved in protein synthesis and appears to be essential for accurate translation	T
NC_008611	MUL_0743	203	780404	C	T	NON	G	D	-1	transcriptional regulatory protein	cytoplasmic protein function unknown, involved in transcriptional mechanism	T
NC_008611	MUL_0744	788	781465	T	C	NON	L	P	1	dioxygenase	Detected in the membrane fraction by proteomics (2D- LC-MS/MS) cytoplasmic protein dioxygenase and related enzymes [secondary metabolites biosynthesis, transport, and catabolism]	C
NC_008611	MUL_0746	461	784398	G	A	NON	G	D	1	DNA-directed RNA polymerase, beta subunit, RpoB	cytoplasmic protein catalyzes the transcription of DNA into RNA using the four ribonucleoside triphosphates as substrates [catalytic activity: N nucleoside triphosphate = N diphosphate + {RNA}(N)]	A
NC_008611	MUL_0746	3153	787090	T	C	SYN	T	T	1	DNA-directed RNA polymerase, beta subunit, RpoB	cytoplasmic protein catalyzes the transcription of DNA into RNA using the four ribonucleoside triphosphates as substrates [catalytic activity: N nucleoside triphosphate = N diphosphate + {RNA}(N)]	C
NC_008611	MUL_0748	35	792169	G	C	NON	G	A	1	PE-PGRS family protein	membrane protein
NC_008611	MUL_0767	319	812524	T	C	NON	S	P	1	hypothetical protein	Detected in the membrane fraction by proteomics (LC- MS/MS) membrane protein	C
NC_008611	MUL_0768	252	813479	C	G	NON	F	L	1	short-chain dehydrogenase/reductase	cytoplasmic protein N-term truncated compared with orthologues	G
NC_008611	MUL_0782	275	830198	C	T	NON	A	V	1	PPE family protein	cytoplasmic protein C-term truncated by IS2606 insertion
NC_008611	MUL_0803	533	846797	A	C	NON	D	A	1	conserved transmembrane protein	membrane protein	C
NC_008611	MUL_0814	816	851883	T	C	SYN	V	V	-1	flavin-dependent oxidoreductase	cytoplasmic protein	C
NC_008611	MUL_0814	154	852545	G	C	NON	Q	E	-1	flavin-dependent oxidoreductase	cytoplasmic protein	C
NC_008611	MUL_0825	63	864448	C	A	SYN	A	A	1	hypothetical protein	Detected in the cytoplasmic and membrane fractions by LC-MS/MS. Also detected in the extracellular matrix by proteomics. cytoplasmic protein	A
NC_008611	MUL_0825	321	864706	C	T	SYN	S	S	1	hypothetical protein	Detected in the cytoplasmic and membrane fractions by LC-MS/MS. Also detected in the extracellular matrix by proteomics. cytoplasmic protein	T
NC_008611	MUL_0825	367	864752	C	T	SYN	L	L	1	hypothetical protein	Detected in the cytoplasmic and membrane fractions by LC-MS/MS. Also detected in the extracellular matrix by proteomics. cytoplasmic protein	T
NC_008611	MUL_0825	375	864760	C	G	SYN	P	P	1	hypothetical protein	Detected in the cytoplasmic and membrane fractions by LC-MS/MS. Also detected in the extracellular matrix by proteomics. cytoplasmic protein	G
NC_008611	MUL_0830	28	869203	A	C	NON	S	R	1	methionine aminopeptidase, MapA	cytoplasmic protein removes the amino-terminal methionine from nascent proteins [catalytic activity: L-methionylpeptide + H2O = L- methionine + peptide]	C
NC_008611	MUL_0830	774	869949	T	C	SYN	N	N	1	methionine aminopeptidase, MapA	cytoplasmic protein removes the amino-terminal methionine from nascent proteins [catalytic activity: L-methionylpeptide + H2O = L- methionine + peptide]	C
NC_008611	MUL_0831	478	870506	C	T	NON	H	Y	1	alternative RNA polymerase sigma factor (RpoE), SigL	cytoplasmic protein the sigma factor is an initiation factor that promotes attachment of the RNA polymerase to specific initiation sites and then is released.	T
NC_008611	MUL_0837	832	875323	T	C	NON	T	A	-1	methylmalonate semialdehyde dehydrogenase, MmsA	Detected in the cytoplamic fraction by LCMSMS. Also detected in the membrane fraction by proteomics (LC- MS/MS) membrane protein plays a role in valine and pyrimidine metabolism. binds fatty acyl-CoA [catalytic activity: 2-methyl-3- oxopropanoate + CoA + NAD+ = propanoyl-CoA + CO2 + NADH]	C
NC_008611	MUL_0841	117	880414	G	C	SYN	A	A	-1	hypothetical protein	cytoplasmic protein
NC_008611	MUL_0842	166	881288	G	C	NON	P	A	-1	hypothetical protein	cytoplasmic protein
NC_008611	MUL_0850	588	886086	T	C	SYN	G	G	1	pseudouridine synthase a, TruA	cytoplasmic protein formation of pseudouridine at positions 38, 39 and 40 in the anticodon stem and loop of transfer RNAS [catalytic activity: uracil + D-ribose 5-phosphate = pseudouridine 5'-phosphate + H(2)O]	C
NC_008611	MUL_0851	1103	886685	G	A	NON	T	I	-1	D-serine/D-alanine/glycine transporter, CycA	membrane protein permease that is involved in the transport across the cytoplasmic membrane of D-alanine, D-serine and glycine	A
NC_008611	MUL_5078	274	888924	T	C	NON	I	V	-1	PPE family protein	membrane protein	C
NC_008611	MUL_5078	184	889014	A	G	NON	S	P	-1	PPE family protein	membrane protein	G
NC_008611	MUL_0886	72	924556	G	C	NON	E	D	1	60 kDa chaperone (GroEL1)	Also detected in the extracellular matrix and the membrane fraction by proteomics. cytoplasmic protein prevents misfolding and promotes the refolding and proper assembly of unfolded polypeptides generated under stress conditions.	C
NC_008611	MUL_0886	1296	925780	A	G	SYN	S	S	1	60 kDa chaperone (GroEL1)	Also detected in the extracellular matrix and the membrane fraction by proteomics. cytoplasmic protein prevents misfolding and promotes the refolding and proper assembly of unfolded polypeptides generated under stress conditions.	G
NC_008611	MUL_0886	1411	925895	G	C	NON	V	L	1	60 kDa chaperone (GroEL1)	Also detected in the extracellular matrix and the membrane fraction by proteomics. cytoplasmic protein prevents misfolding and promotes the refolding and proper assembly of unfolded polypeptides generated under stress conditions.	C
NC_008611	MUL_0918	1967	961307	C	T	NON	R	K	-1	short-chain dehydrogenase, AcrA1	cytoplasmic protein multi functional protein with fatty acyl-CoA reductase activity in C-terminal part	T
NC_008611	MUL_0918	1792	961482	T	C	NON	I	V	-1	short-chain dehydrogenase, AcrA1	cytoplasmic protein multi functional protein with fatty acyl-CoA reductase activity in C-terminal part	C
NC_008611	MUL_0919	310	963717	G	C	NON	Q	E	-1	conserved lipoprotein, LpqD	membrane protein	C
NC_008611	MUL_0919	172	963855	G	A	SYN	L	L	-1	conserved lipoprotein, LpqD	membrane protein	A
NC_008611	MUL_0921	342	965839	T	C	SYN	E	E	-1	trehalose-6-phosphate phosphatase OtsB2	cytoplasmic protein involved in osmoregulatory trehalose biosynthesis. mycobacteria can produce trehalose from glucose 6- phosphate and UDP-glucose (the OtsA-OtsB pathway) from glycogen-like alpha(1-->4)-linked glucose polymers (the TreY-TreZ pathway) and from maltose (the TreS pathway) [catalytic activity: trehalose 6-phosphate + H(2)O = trehalose + orthophosphate]	C
NC_008611	MUL_0921	297	965884	C	G	SYN	A	A	-1	trehalose-6-phosphate phosphatase OtsB2	cytoplasmic protein involved in osmoregulatory trehalose biosynthesis. mycobacteria can produce trehalose from glucose 6- phosphate and UDP-glucose (the OtsA-OtsB pathway) from glycogen-like alpha(1-->4)-linked glucose polymers (the TreY-TreZ pathway) and from maltose (the TreS pathway) [catalytic activity: trehalose 6-phosphate + H(2)O = trehalose + orthophosphate]	G
NC_008611	MUL_0923	1758	969572	G	A	SYN	K	K	1	DNA polymerase III, alpha chain, DnaE2	cytoplasmic protein DNA polymerase III is a complex, multichain enzyme responsible for most of the replicative synthesis in bacteria. the alpha chain is the DNA polymerase. thought to be regulated by LexA [catalytic activity: N deoxynucleoside triphosphate = N pyrophosphate + DNA(N)]	A
NC_008611	MUL_0923	3190	971004	A	G	NON	S	G	1	DNA polymerase III, alpha chain, DnaE2	cytoplasmic protein DNA polymerase III is a complex, multichain enzyme responsible for most of the replicative synthesis in bacteria. the alpha chain is the DNA polymerase. thought to be regulated by LexA [catalytic activity: N deoxynucleoside triphosphate = N pyrophosphate + DNA(N)]	G
NC_008611	MUL_0944	902	990696	G	A	NON	S	F	-1	transcriptional regulatory protein	cytoplasmic protein involved in transcriptional mechanism.	A
NC_008611	MUL_0944	834	990764	C	T	SYN	G	G	-1	transcriptional regulatory protein	cytoplasmic protein involved in transcriptional mechanism.	T
NC_008611	MUL_0944	800	990798	T	C	NON	D	G	-1	transcriptional regulatory protein	cytoplasmic protein involved in transcriptional mechanism.	C
NC_008611	MUL_0944	786	990812	G	C	SYN	V	V	-1	transcriptional regulatory protein	cytoplasmic protein involved in transcriptional mechanism.	C
NC_008611	MUL_0944	535	991063	C	T	NON	E	K	-1	transcriptional regulatory protein	cytoplasmic protein involved in transcriptional mechanism.	T
NC_008611	MUL_0946	58	992401	C	T	NON	P	S	1	PPE family protein	PE31; membrane protein	T
NC_008611	MUL_0947	38	992720	G	C	NON	G	A	1	PPE family protein	PPE18; membrane protein	C
NC_008611	MUL_0947	710	993392	C	T	NON	S	L	1	PPE family protein	PPE18; membrane protein	T
NC_008611	MUL_0947	781	993463	C	T	NON	L	F	1	PPE family protein	PPE18; membrane protein	T
NC_008611	MUL_0947	820	993502	T	C	NON	S	P	1	PPE family protein	PPE18; membrane protein	C
NC_008611	MUL_0948	19	994665	C	G	NON	A	P	-1	hypothetical protein		G
NC_008611	MUL_0964	41	1010103	T	C	NON	L	P	1	PPE family protein	secreted protein	C
NC_008611	MUL_0965	1191	1013596	G	C	NON	K	N	1	PPE family protein	secreted protein
NC_008611	MUL_0965	1242	1013647	C	G	NON	N	K	1	PPE family protein	secreted protein	G
NC_008611	MUL_0989	1473	1043859	G	C	SYN	G	G	1	conserved transmembrane transport protein MmpL13	membrane protein thought to be involved in fatty acid transport.	C
NC_008611	MUL_0989	1521	1043907	T	C	SYN	A	A	1	conserved transmembrane transport protein MmpL13	membrane protein thought to be involved in fatty acid transport.	C
NC_008611	MUL_0993	340	1047286	T	A	NON	Y	N	1	transcriptional regulatory protein	cytoplasmic protein involved in transcriptional mechanism	A
NC_008611	MUL_0998	170	1050491	G	A	NON	G	E	1	hypothetical protein	cytoplasmic protein	A
NC_008611	MUL_0999	379	1050580	G	C	NON	Q	E	-1	hypothetical protein	membrane protein	C
NC_008611	MUL_1001	791	1052950	G	A	NON	A	V	-1	hypothetical membrane protein	membrane protein	A
NC_008611	MUL_1001	777	1052964	C	T	SYN	G	G	-1	hypothetical membrane protein	membrane protein	T
NC_008611	MUL_1001	241	1053500	G	C	NON	P	A	-1	hypothetical membrane protein	membrane protein
NC_008611	MUL_1001	229	1053512	G	T	NON	H	N	-1	hypothetical membrane protein	membrane protein	T
NC_008611	MUL_1002	165	1054162	T	C	SYN	D	D	1	hypothetical protein	Detected in the cytoplasmic fraction by 2D-LC- MS/MS.
NC_008611	MUL_1006	543	1057347	G	C	SYN	V	V	1	conserved transmembrane protein	membrane protein	C
NC_008611	MUL_1006	549	1057353	A	G	SYN	L	L	1	conserved transmembrane protein	membrane protein
NC_008611	MUL_1006	777	1057581	G	T	SYN	L	L	1	conserved transmembrane protein	membrane protein	T
NC_008611	MUL_1006	990	1057794	A	G	SYN	L	L	1	conserved transmembrane protein	membrane protein	G
NC_008611	MUL_1006	1048	1057852	G	C	NON	V	L	1	conserved transmembrane protein	membrane protein	C
NC_008611	MUL_1008	236	1058872	C	T	NON	P	L	1	mutator protein MutT2	cytoplasmic protein involved in the go system responsible for removing an oxidatively damaged form of guanine (7,8-dihydro-8- oxoguanine) from DNA and the nucleotide pool. 8-oxo-dGTP is inserted opposite da and dc residues of template DNA with almost equal efficiency thus leading to AT to GC transversions. MutT specifically degrades 8-oxo-dGTP to the monophosphate.	T
NC_008611	MUL_1009	321	1059631	T	C	SYN	G	G	1	GTP-binding translation elongation factor TypA	cytoplasmic protein function unknown, probably interacts with the ribosomes in a GTP dependent manner	C
NC_008611	MUL_1009	337	1059647	G	C	NON	G	R	1	GTP-binding translation elongation factor TypA	cytoplasmic protein function unknown, probably interacts with the ribosomes in a GTP dependent manner	C
NC_008611	MUL_1009	831	1060141	C	T	SYN	T	T	1	GTP-binding translation elongation factor TypA	cytoplasmic protein function unknown, probably interacts with the ribosomes in a GTP dependent manner	T
NC_008611	MUL_1009	1339	1060649	G	A	NON	V	M	1	GTP-binding translation elongation factor TypA	cytoplasmic protein function unknown, probably interacts with the ribosomes in a GTP dependent manner	A
NC_008611	MUL_1017	815	1071382	T	A	NON	L	Q	1	N-acetyl-1-D-myo-inosityl-2-amino-2-deoxy-alpha- D-glucopyranoside deacetylase MshB	cytoplasmic protein involved in mycothiol biosynthesis. 1-D-myo- inosityl-2-acetamido-2-deoxy-alpha-D-glucopyranoside (GlcNAc-Ins)is converted to 1-D-myo-inosityl-2-amino-2- deoxy-alpha-D-glucopyranoside (GlcN-Ins) by this enzyme. seems to possesse weak mycothiol conjugate ami	A
NC_008611	MUL_1017	849	1071416	G	A	SYN	E	E	1	N-acetyl-1-D-myo-inosityl-2-amino-2-deoxy-alpha- D-glucopyranoside deacetylase MshB	cytoplasmic protein involved in mycothiol biosynthesis. 1-D-myo- inosityl-2-acetamido-2-deoxy-alpha-D-glucopyranoside (GlcNAc-Ins)is converted to 1-D-myo-inosityl-2-amino-2- deoxy-alpha-D-glucopyranoside (GlcN-Ins) by this enzyme. seems to possesse weak mycothiol conjugate ami	A
NC_008611	MUL_1019	49	1072912	C	T	NON	D	N	-1	PE family protein	secreted protein
NC_008611	MUL_1020	558	1073722	C	G	SYN	G	G	1	F420 biosynthesis protein FbiC	cytoplasmic protein essential for coenzyme F420 production: participates in a portion of the F420 biosynthetic pathway between pyrimidinedione and fo (biosynthesis intermediate), before the deazaflavin ring is formed.	G
NC_008611	MUL_1020	1405	1074569	G	A	NON	A	T	1	F420 biosynthesis protein FbiC	cytoplasmic protein essential for coenzyme F420 production: participates in a portion of the F420 biosynthetic pathway between pyrimidinedione and fo (biosynthesis intermediate), before the deazaflavin ring is formed.	A
NC_008611	MUL_1020	1887	1075051	T	C	SYN	H	H	1	F420 biosynthesis protein FbiC	cytoplasmic protein essential for coenzyme F420 production: participates in a portion of the F420 biosynthetic pathway between pyrimidinedione and fo (biosynthesis intermediate), before the deazaflavin ring is formed.	C
NC_008611	MUL_1021	181	1076487	C	T	NON	H	Y	1	PE-PGRS family protein	membrane protein	T
NC_008611	MUL_1021	308	1076614	C	A	NON	S	*	1	PE-PGRS family protein	membrane protein	A
NC_008611	MUL_1021	322	1076628	C	G	NON	L	V	1	PE-PGRS family protein	membrane protein	G
NC_008611	MUL_1021	1785	1078091	G	C	NON	M	I	1	PE-PGRS family protein	membrane protein	C
NC_008611	MUL_1021	2023	1078329	C	G	NON	P	A	1	PE-PGRS family protein	membrane protein	G
NC_008611	MUL_1046	35	1105314	A	G	NON	E	G	1	acyl-CoA transferase	cytoplasmic protein	G
NC_008611	MUL_1046	707	1105986	G	A	NON	C	Y	1	acyl-CoA transferase	cytoplasmic protein	A
NC_008611	MUL_1049	57	1107936	C	G	NON	Y	*	1	cytochrome P450 191A3 Cyp191A3	cytoplasmic protein cytochromes P450 are a group of heme-thiolate monooxygenases. they oxidize a variety of structurally unrelated compounds, including steroids, fatty acids, and xenobiotics.	G
NC_008611	MUL_1049	649	1108528	C	A	NON	L	M	1	cytochrome P450 191A3 Cyp191A3	cytoplasmic protein cytochromes P450 are a group of heme-thiolate monooxygenases. they oxidize a variety of structurally unrelated compounds, including steroids, fatty acids, and xenobiotics.	A
NC_008611	MUL_1049	661	1108540	C	T	SYN	L	L	1	cytochrome P450 191A3 Cyp191A3	cytoplasmic protein cytochromes P450 are a group of heme-thiolate monooxygenases. they oxidize a variety of structurally unrelated compounds, including steroids, fatty acids, and xenobiotics.	T
NC_008611	MUL_1049	1090	1108969	G	T	NON	A	S	1	cytochrome P450 191A3 Cyp191A3	cytoplasmic protein cytochromes P450 are a group of heme-thiolate monooxygenases. they oxidize a variety of structurally unrelated compounds, including steroids, fatty acids, and xenobiotics.	T
NC_008611	MUL_1056	254	1115391	T	C	NON	L	P	1	hypothetical protein		C
NC_008611	MUL_1056	280	1115417	T	C	SYN	L	L	1	hypothetical protein
NC_008611	MUL_1056	356	1115493	A	C	NON	Q	P	1	hypothetical protein		C
NC_008611	MUL_1058	347	1116495	A	T	NON	V	D	-1	transcriptional regulatory protein (probably GntR-family)	cytoplasmic protein possibly involved in transcriptional mechanism.	T
NC_008611	MUL_1068	82	1128937	G	A	NON	A	T	1	conserved Mce associated membrane protein	Detected in the membrane fraction by proteomics (LC- MS/MS) Also detected in the cytoplasmic fraction (2D- MALDI) membrane protein	A
NC_008611	MUL_1103	13	1174615	G	T	NON	V	F	1	enoyl-CoA hydratase, EchA8_4	cytoplasmic protein oxidizes fatty acids using specific components (by similarity) [catalytic activity: (3S)-3-hydroxyacyl-CoA = trans-2(or 3)-enoyl-CoA + H(2)O]	T
NC_008611	MUL_1103	31	1174633	C	T	NON	P	S	1	enoyl-CoA hydratase, EchA8_4	cytoplasmic protein oxidizes fatty acids using specific components (by similarity) [catalytic activity: (3S)-3-hydroxyacyl-CoA = trans-2(or 3)-enoyl-CoA + H(2)O]	T
NC_008611	MUL_1107	580	1179260	G	A	NON	A	T	1	hypothetical protein	Detected in the membrane fraction by proteomics (2D- LC-MS/MS) membrane protein	A
NC_008611	MUL_1109	686	1181659	C	T	NON	S	L	1	hypothetical protein	cytoplasmic protein	T
NC_008611	MUL_1109	705	1181678	C	T	SYN	P	P	1	hypothetical protein	cytoplasmic protein	T
NC_008611	MUL_1117	217	1191409	C	A	NON	H	N	1	fatty-acid-CoA ligase	membrane protein function unknown, but involvement in lipid degradation.	A
NC_008611	MUL_1117	1247	1192439	A	G	NON	D	G	1	fatty-acid-CoA ligase	membrane protein function unknown, but involvement in lipid degradation.	G
NC_008611	MUL_1143	537	1219893	A	G	SYN	R	R	-1	hypothetical protein	cytoplasmic protein	G
NC_008611	MUL_1144	88	1220977	C	A	NON	V	F	-1	hypothetical protein	membrane protein	A
NC_008611	MUL_1154	713	1235126	T	C	NON	L	P	1	PPE family protein	membrane protein	C
NC_008611	MUL_1154	780	1235193	G	A	SYN	A	A	1	PPE family protein	membrane protein	A
NC_008611	MUL_1154	908	1235321	A	G	NON	D	G	1	PPE family protein	membrane protein	G
NC_008611	MUL_1154	937	1235350	G	C	NON	A	P	1	PPE family protein	membrane protein	C
NC_008611	MUL_1156	1369	1238301	G	C	NON	H	D	-1	hypothetical protein	membrane protein
NC_008611	MUL_1156	1368	1238302	G	A	SYN	R	R	-1	hypothetical protein	membrane protein	A
NC_008611	MUL_1161	218	1245832	C	T	NON	S	N	-1	conserved hypothetical small secreted protein	secreted protein	T
NC_008611	MUL_1164	477	1248554	C	T	SYN	D	D	1	conserved transmembrane protein	membrane protein function unknown, possibly ion channel involved in transport of chloride across the membrane.	T
NC_008611	MUL_1164	862	1248939	T	C	NON	W	R	1	conserved transmembrane protein	membrane protein function unknown, possibly ion channel involved in transport of chloride across the membrane.	C
NC_008611	MUL_1164	1063	1249140	C	G	NON	L	V	1	conserved transmembrane protein	membrane protein function unknown, possibly ion channel involved in transport of chloride across the membrane.	G
NC_008611	MUL_1178	277	1263983	T	C	NON	N	D	-1	heat shock protein Hsp	cytoplasmic protein thought to be involved in the initiation step of translation at high temperature. bound to 30S ribosomal subunit. possibly a molecular chaperone. in M. tuberculosis H37Rv seems to be regulated positively by SigE and negatively by HspR.	C
NC_008611	MUL_1201	41	1288553	T	C	NON	V	A	1	hypothetical protein		C
NC_008611	MUL_1202	1370	1291057	T	G	NON	L	R	1	PPE family protein	PPE3; secreted protein	G
NC_008611	MUL_1210	274	1302606	A	G	NON	T	A	1	EsaT-6 like protein EsxH	membrane protein	G
NC_008611	MUL_1216	369	1309174	T	G	SYN	A	A	1	trans-aconitate methyltransferase Tam	cytoplasmic protein may catalyze the S-adenosylmethionine monomethyl esterification of trans-aconitate at high affinity and of cis-aconitate, isocitrate, and citrate at lower velocities and affinities.	G
NC_008611	MUL_1216	451	1309256	G	A	NON	V	M	1	trans-aconitate methyltransferase Tam	cytoplasmic protein may catalyze the S-adenosylmethionine monomethyl esterification of trans-aconitate at high affinity and of cis-aconitate, isocitrate, and citrate at lower velocities and affinities.	A
NC_008611	MUL_1217	977	1309994	T	A	NON	K	M	-1	sulfatase	cytoplasmic protein function unknown, probably involved in cellular metabolism.	A
NC_008611	MUL_1217	704	1310267	T	C	NON	D	G	-1	sulfatase	cytoplasmic protein function unknown, probably involved in cellular metabolism.	C
NC_008611	MUL_1217	505	1310466	C	G	NON	D	H	-1	sulfatase	cytoplasmic protein function unknown, probably involved in cellular metabolism.	G
NC_008611	MUL_1217	503	1310468	A	G	NON	V	A	-1	sulfatase	cytoplasmic protein function unknown, probably involved in cellular metabolism.
NC_008611	MUL_1217	491	1310480	T	A	NON	D	V	-1	sulfatase	cytoplasmic protein function unknown, probably involved in cellular metabolism.	A
NC_008611	MUL_1223	486	1313954	T	C	SYN	H	H	1	conserved exported protein	secreted protein	C
NC_008611	MUL_1225	436	1315135	G	A	NON	D	N	1	hypothetical protein	cytoplasmic protein	A
NC_008611	MUL_1225	451	1315150	A	G	NON	M	V	1	hypothetical protein	cytoplasmic protein	G
NC_008611	MUL_1225	733	1315432	T	C	NON	F	L	1	hypothetical protein	cytoplasmic protein	C
NC_008611	MUL_1225	780	1315479	T	C	SYN	D	D	1	hypothetical protein	cytoplasmic protein	C
NC_008611	MUL_1225	790	1315489	G	C	NON	V	P	1	hypothetical protein	cytoplasmic protein
NC_008611	MUL_1225	791	1315490	T	C	NON	V	P	1	hypothetical protein	cytoplasmic protein	C
NC_008611	MUL_1233	1099	1332747	C	T	NON	D	N	-1	acyl-CoA dehydrogenase	cytoplasmic protein function unknown, but seems involved in metabolism of small branched-chain fatty acids and macrolide antibiotic production. catalyses the alpha, beta- dehydrogenetion of acyl-CoA esters and transfer electrons to ETF, the electron transfer protein.	T
NC_008611	MUL_1233	707	1333139	T	C	NON	D	G	-1	acyl-CoA dehydrogenase	cytoplasmic protein function unknown, but seems involved in metabolism of small branched-chain fatty acids and macrolide antibiotic production. catalyses the alpha, beta- dehydrogenetion of acyl-CoA esters and transfer electrons to ETF, the electron transfer protein.	C
NC_008611	MUL_1237	2322	1337412	C	G	SYN	A	A	-1	conserved transmembrane ATP-binding protein ABC transporter	membrane protein thought to be involved in active transport of undeterminated substrate (possibly lipooligosaccharide) across the membrane. responsible for energy coupling to the transport system and for the translocation of the substrate across the membrane.	G
NC_008611	MUL_1237	1807	1337927	C	A	NON	A	S	-1	conserved transmembrane ATP-binding protein ABC transporter	membrane protein thought to be involved in active transport of undeterminated substrate (possibly lipooligosaccharide) across the membrane. responsible for energy coupling to the transport system and for the translocation of the substrate across the membrane.	A
NC_008611	MUL_1237	1756	1337978	T	C	NON	T	A	-1	conserved transmembrane ATP-binding protein ABC transporter	membrane protein thought to be involved in active transport of undeterminated substrate (possibly lipooligosaccharide) across the membrane. responsible for energy coupling to the transport system and for the translocation of the substrate across the membrane.	C
NC_008611	MUL_1237	741	1338993	T	G	NON	E	D	-1	conserved transmembrane ATP-binding protein ABC transporter	membrane protein thought to be involved in active transport of undeterminated substrate (possibly lipooligosaccharide) across the membrane. responsible for energy coupling to the transport system and for the translocation of the substrate across the membrane.
NC_008611	MUL_1237	731	1339003	T	C	NON	D	G	-1	conserved transmembrane ATP-binding protein ABC transporter	membrane protein thought to be involved in active transport of undeterminated substrate (possibly lipooligosaccharide) across the membrane. responsible for energy coupling to the transport system and for the translocation of the substrate across the membrane.	C
NC_008611	MUL_1238	135	1340227	T	C	SYN	R	R	-1	hypothetical protein	cytoplasmic protein	C
NC_008611	MUL_1275	43	1373372	C	G	NON	D	H	-1	hypothetical protein	cytoplasmic protein	G
NC_008611	MUL_1287	735	1384285	A	G	SYN	V	V	-1	hypothetical protein	cytoplasmic protein	G
NC_008611	MUL_1287	183	1384837	G	C	NON	N	K	-1	hypothetical protein	cytoplasmic protein	C
NC_008611	MUL_1297	695	1393699	T	C	NON	D	G	-1	hypothetical protein	cytoplasmic protein	C
NC_008611	MUL_1297	401	1393993	G	C	NON	P	R	-1	hypothetical protein	cytoplasmic protein	C
NC_008611	MUL_1298	360	1395638	A	G	SYN	G	G	-1	flavoprotein	Detected in the cytoplasmic fraction by 2D-LC- MS/MS. cytoplasmic protein electron acceptor	G
NC_008611	MUL_1298	54	1395944	C	G	SYN	G	G	-1	flavoprotein	Detected in the cytoplasmic fraction by 2D-LC- MS/MS. cytoplasmic protein electron acceptor
NC_008611	MUL_1301	163	1398883	G	A	SYN	L	L	-1	hypothetical protein	cytoplasmic protein	A
NC_008611	MUL_1301	87	1398959	G	A	SYN	N	N	-1	hypothetical protein	cytoplasmic protein	A
NC_008611	MUL_1328	1069	1426970	A	G	NON	S	P	-1	hypothetical protein	Detected in the cytoplasmic fraction by 2D-LC- MS/MS cytoplasmic protein	G
NC_008611	MUL_1334	427	1435045	G	A	NON	V	M	1	exported protease	secreted protein function unknown; thought to hydrolyze peptides and/or proteins.	A
NC_008611	MUL_1334	576	1435194	G	C	SYN	A	A	1	exported protease	secreted protein function unknown; thought to hydrolyze peptides and/or proteins.	C
NC_008611	MUL_1334	878	1435496	T	C	NON	V	A	1	exported protease	secreted protein function unknown; thought to hydrolyze peptides and/or proteins.	C
NC_008611	MUL_1334	975	1435593	C	G	SYN	R	R	1	exported protease	secreted protein function unknown; thought to hydrolyze peptides and/or proteins.	G
NC_008611	MUL_1336	2246	1439933	G	C	NON	G	A	1	glutamate-ammonia-ligase adenylyltransferase GlnE	cytoplasmic protein regulatory protein involved in the regulation of glutamine synthetase activity. adenylylation and deadenylylation of glutamine synthetase. possibly regulates GlnB [catalytic activity: ATP + [L- glutamate:ammonia ligase (ADP-forming)] = pyrophosphate + adenylyl-[L-glutamate:ammonia ligase (ADP-forming)]]	C
NC_008611	MUL_1336	2290	1439977	T	C	SYN	L	L	1	glutamate-ammonia-ligase adenylyltransferase GlnE	cytoplasmic protein regulatory protein involved in the regulation of glutamine synthetase activity. adenylylation and deadenylylation of glutamine synthetase. possibly regulates GlnB [catalytic activity: ATP + [L- glutamate:ammonia ligase (ADP-forming)] = pyrophosphate + adenylyl-[L-glutamate:ammonia ligase (ADP-forming)]]	C
NC_008611	MUL_1336	2387	1440074	G	A	NON	G	E	1	glutamate-ammonia-ligase adenylyltransferase GlnE	cytoplasmic protein regulatory protein involved in the regulation of glutamine synthetase activity. adenylylation and deadenylylation of glutamine synthetase. possibly regulates GlnB [catalytic activity: ATP + [L- glutamate:ammonia ligase (ADP-forming)] = pyrophosphate + adenylyl-[L-glutamate:ammonia ligase (ADP-forming)]]	A
NC_008611	MUL_1340	854	1445253	T	C	NON	D	G	-1	glutamine synthetase GlnA1	Detected in the membrane fraction by proteomics (LC- MS/MS) cytoplasmic protein involved in glutamine biosynthesis [catalytic activity: ATP + L-glutamate + NH(3) = ADP + glutamine + orthophosphate]	C
NC_008611	MUL_1340	531	1445576	G	T	SYN	G	G	-1	glutamine synthetase GlnA1	Detected in the membrane fraction by proteomics (LC- MS/MS) cytoplasmic protein involved in glutamine biosynthesis [catalytic activity: ATP + L-glutamate + NH(3) = ADP + glutamine + orthophosphate]	T
NC_008611	MUL_1345	815	1450384	C	T	NON	S	F	1	drugs-transport transmembrane ATP-binding protein ABC transporter	membrane protein thought to be involved in active transport of drugs across the membrane (export): multidrugs resistance by an export mechanism. responsible for energy coupling to the transport system and for the translocation of the substrate across the membrane.	T
NC_008611	MUL_1345	915	1450484	A	G	SYN	E	E	1	drugs-transport transmembrane ATP-binding protein ABC transporter	membrane protein thought to be involved in active transport of drugs across the membrane (export): multidrugs resistance by an export mechanism. responsible for energy coupling to the transport system and for the translocation of the substrate across the membrane.	G
NC_008611	MUL_1345	960	1450529	C	T	SYN	A	A	1	drugs-transport transmembrane ATP-binding protein ABC transporter	membrane protein thought to be involved in active transport of drugs across the membrane (export): multidrugs resistance by an export mechanism. responsible for energy coupling to the transport system and for the translocation of the substrate across the membrane.	T
NC_008611	MUL_1345	988	1450557	A	G	NON	N	D	1	drugs-transport transmembrane ATP-binding protein ABC transporter	membrane protein thought to be involved in active transport of drugs across the membrane (export): multidrugs resistance by an export mechanism. responsible for energy coupling to the transport system and for the translocation of the substrate across the membrane.
NC_008611	MUL_1345	1705	1451274	C	T	NON	L	F	1	drugs-transport transmembrane ATP-binding protein ABC transporter	membrane protein thought to be involved in active transport of drugs across the membrane (export): multidrugs resistance by an export mechanism. responsible for energy coupling to the transport system and for the translocation of the substrate across the membrane.	T
NC_008611	MUL_1345	1718	1451287	G	A	NON	R	Q	1	drugs-transport transmembrane ATP-binding protein ABC transporter	membrane protein thought to be involved in active transport of drugs across the membrane (export): multidrugs resistance by an export mechanism. responsible for energy coupling to the transport system and for the translocation of the substrate across the membrane.	A
NC_008611	MUL_1351	676	1457389	T	C	NON	M	V	-1	multimeric flavodoxin WrbA	cytoplasmic protein	C
NC_008611	MUL_1353	489	1458988	A	G	SYN	C	C	-1	alternative RNA polymerase sigma factor	cytoplasmic protein the sigma factor is an initiation factor that promotes attachment of the RNA polymerase to specific initiation sites and then is released.
NC_008611	MUL_1353	475	1459002	T	C	NON	S	G	-1	alternative RNA polymerase sigma factor	cytoplasmic protein the sigma factor is an initiation factor that promotes attachment of the RNA polymerase to specific initiation sites and then is released.
NC_008611	MUL_1353	466	1459011	G	C	NON	R	G	-1	alternative RNA polymerase sigma factor	cytoplasmic protein the sigma factor is an initiation factor that promotes attachment of the RNA polymerase to specific initiation sites and then is released.
NC_008611	MUL_1353	247	1459230	C	T	NON	A	T	-1	alternative RNA polymerase sigma factor	cytoplasmic protein the sigma factor is an initiation factor that promotes attachment of the RNA polymerase to specific initiation sites and then is released.	T
NC_008611	MUL_1354	101	1459777	C	G	NON	T	S	1	hypothetical protein	cytoplasmic protein	G
NC_008611	MUL_1354	358	1460034	A	G	NON	M	V	1	hypothetical protein	cytoplasmic protein	G
NC_008611	MUL_1374	616	1480110	A	C	NON	Y	D	-1	exodeoxyribonuclease III protein XthA	Detected in the membrane fraction by proteomics (LC- MS/MS) cytoplasmic protein involved in base excision repair. apurinic- apyrimidinic endonuclease. supposed to remove the damaged DNA at cytosines and guanines by cleaving at the 3' side of the ap site by a beta-elimination reaction. possibly exhibites 3'-5'-exonuclease, 3'-phosphomonoesterase, 3'- repair diesterase and ribonuclease H activities…	C
NC_008611	MUL_1374	214	1480512	T	C	NON	S	G	-1	exodeoxyribonuclease III protein XthA	Detected in the membrane fraction by proteomics (LC- MS/MS) cytoplasmic protein involved in base excision repair. apurinic- apyrimidinic endonuclease. supposed to remove the damaged DNA at cytosines and guanines by cleaving at the 3' side of the ap site by a beta-elimination reaction. possibly exhibites 3'-5'-exonuclease, 3'-phosphomonoesterase, 3'- repair diesterase and ribonuclease H activities…	C
NC_008611	MUL_1374	90	1480636	G	A	SYN	C	C	-1	exodeoxyribonuclease III protein XthA	Detected in the membrane fraction by proteomics (LC- MS/MS) cytoplasmic protein involved in base excision repair. apurinic- apyrimidinic endonuclease. supposed to remove the damaged DNA at cytosines and guanines by cleaving at the 3' side of the ap site by a beta-elimination reaction. possibly exhibites 3'-5'-exonuclease, 3'-phosphomonoesterase, 3'- repair diesterase and ribonuclease H activities…	A
NC_008611	MUL_1383	618	1488225	T	C	SYN	D	D	1	hypothetical protein	cytoplasmic protein	C
NC_008611	MUL_1393	320	1499318	C	T	NON	A	V	1	60 kDa chaperonin 2 GroEL2	Also detected in the extracellular matrix, the membrane fraction and the secreted protein fraction by proteomics. cytoplasmic protein prevents misfolding and promotes the refolding and proper assembly of unfolded polypeptides generated under stress conditions.	T
NC_008611	MUL_1393	546	1499544	C	T	SYN	G	G	1	60 kDa chaperonin 2 GroEL2	Also detected in the extracellular matrix, the membrane fraction and the secreted protein fraction by proteomics. cytoplasmic protein prevents misfolding and promotes the refolding and proper assembly of unfolded polypeptides generated under stress conditions.	T
NC_008611	MUL_1401	684	1507326	C	G	NON	K	N	-1	conserved transmembrane protein	membrane protein	G
NC_008611	MUL_1401	233	1507777	C	G	NON	R	T	-1	conserved transmembrane protein	membrane protein	G
NC_008611	MUL_1404	1163	1510174	A	G	NON	L	S	-1	oxidoreductase	membrane protein	G
NC_008611	MUL_1404	1148	1510189	A	G	NON	V	A	-1	oxidoreductase	membrane protein	G
NC_008611	MUL_1404	993	1510344	A	G	SYN	D	D	-1	oxidoreductase	membrane protein	G
NC_008611	MUL_1424	1609	1529937	T	C	NON	T	A	-1	conserved transmembrane ATP-binding protein ABC transporter	membrane protein thought to be involved in active transport of undeterminated substrate (possibly lipooligosaccharide) across the membrane. responsible for energy coupling to the transport system and for the translocation of the substrate across the membrane.	C
NC_008611	MUL_1424	358	1531188	C	G	NON	V	L	-1	conserved transmembrane ATP-binding protein ABC transporter	membrane protein thought to be involved in active transport of undeterminated substrate (possibly lipooligosaccharide) across the membrane. responsible for energy coupling to the transport system and for the translocation of the substrate across the membrane.	G
NC_008611	MUL_1424	356	1531190	C	G	NON	G	A	-1	conserved transmembrane ATP-binding protein ABC transporter	membrane protein thought to be involved in active transport of undeterminated substrate (possibly lipooligosaccharide) across the membrane. responsible for energy coupling to the transport system and for the translocation of the substrate across the membrane.	G
NC_008611	MUL_1424	218	1531328	G	C	NON	A	G	-1	conserved transmembrane ATP-binding protein ABC transporter	membrane protein thought to be involved in active transport of undeterminated substrate (possibly lipooligosaccharide) across the membrane. responsible for energy coupling to the transport system and for the translocation of the substrate across the membrane.	C
NC_008611	MUL_1424	202	1531344	G	C	NON	R	G	-1	conserved transmembrane ATP-binding protein ABC transporter	membrane protein thought to be involved in active transport of undeterminated substrate (possibly lipooligosaccharide) across the membrane. responsible for energy coupling to the transport system and for the translocation of the substrate across the membrane.	C
NC_008611	MUL_1431	303	1537974	A	G	SYN	P	P	1	oxidoreductase	secreted protein function unknown, probably involved in cellular metabolism.	G
NC_008611	MUL_1432	155	1539516	T	C	NON	V	A	1	fatty-acyl AMP ligase FadD28_1	cytoplasmic protein	C
NC_008611	MUL_1432	1185	1540546	C	T	SYN	C	C	1	fatty-acyl AMP ligase FadD28_1	cytoplasmic protein	T
NC_008611	MUL_1432	1200	1540561	T	C	SYN	V	V	1	fatty-acyl AMP ligase FadD28_1	cytoplasmic protein
NC_008611	MUL_1432	1346	1540707	C	T	NON	A	V	1	fatty-acyl AMP ligase FadD28_1	cytoplasmic protein	T
NC_008611	MUL_1446	175	1562101	A	G	NON	T	A	1	conserved hypothetical secreted protein	secreted protein	G
NC_008611	MUL_1446	611	1562537	G	C	NON	G	A	1	conserved hypothetical secreted protein	secreted protein	C
NC_008611	MUL_1447	357	1563028	T	C	SYN	A	A	1	hypothetical protein	cytoplasmic protein possible inter-alpha-trypsin inhibitor family heavy chain-related protein-hypothetical secreted or membrane- associated protein containing vWFA domain.	C
NC_008611	MUL_1447	391	1563062	T	C	NON	Y	H	1	hypothetical protein	cytoplasmic protein possible inter-alpha-trypsin inhibitor family heavy chain-related protein-hypothetical secreted or membrane- associated protein containing vWFA domain.
NC_008611	MUL_1447	546	1563217	C	T	SYN	A	A	1	hypothetical protein	cytoplasmic protein possible inter-alpha-trypsin inhibitor family heavy chain-related protein-hypothetical secreted or membrane- associated protein containing vWFA domain.	T
NC_008611	MUL_1450	167	1567558	G	C	NON	C	S	1	PE-PGRS family protein	membrane protein	C
NC_008611	MUL_1450	221	1567612	C	G	NON	T	S	1	PE-PGRS family protein	membrane protein	G
NC_008611	MUL_1450	240	1567631	C	G	SYN	L	L	1	PE-PGRS family protein	membrane protein	G
NC_008611	MUL_1450	1071	1568462	G	C	SYN	A	A	1	PE-PGRS family protein	membrane protein	C
NC_008611	MUL_1472	107	1592237	A	G	NON	V	A	-1	adenylate cyclase	membrane protein thought to play an essential roles in regulation of cellular metabolism by catalysing the synthesis of a second messenger, camp [catalytic activity: ATP = 3',5'- cyclic AMP + pyrophosphate]	G
NC_008611	MUL_1475	274	1597894	G	A	NON	A	T	1	lipoprotein LppP	Detected in the membrane fraction by proteomics (LC- MS/MS) membrane protein	A
NC_008611	MUL_1477	538	1599453	C	T	NON	P	S	1	cation transporter p-type ATPase D CtpD	membrane protein cation-transporting ATPase; possibly catalyzes the transport of a cation (possibly cadmium) with the hydrolyse of ATP [catalytic activity: ATP + H(2)O + cation(in) = ADP + phosphate + cation(out)]
NC_008611	MUL_1477	970	1599885	G	A	NON	D	N	1	cation transporter p-type ATPase D CtpD	membrane protein cation-transporting ATPase; possibly catalyzes the transport of a cation (possibly cadmium) with the hydrolyse of ATP [catalytic activity: ATP + H(2)O + cation(in) = ADP + phosphate + cation(out)]	A
NC_008611	MUL_1477	974	1599889	C	T	NON	A	V	1	cation transporter p-type ATPase D CtpD	membrane protein cation-transporting ATPase; possibly catalyzes the transport of a cation (possibly cadmium) with the hydrolyse of ATP [catalytic activity: ATP + H(2)O + cation(in) = ADP + phosphate + cation(out)]	T
NC_008611	MUL_1483	535	1604614	A	G	SYN	L	L	-1	transcriptional regulatory protein	cytoplasmic protein involved in transcriptional mechanism.	G
NC_008611	MUL_1485	455	1608707	C	T	NON	S	F	1	hypothetical protein	Detected in the membrane fraction by proteomics (LC- MS/MS) membrane protein
NC_008611	MUL_1486	918	1609980	C	T	SYN	N	N	1	cell wall-associated hydrolase	secreted protein function unknown, similar to a hypothetical invasion protein. possibly an exported protein with unusually long signal sequence. NLP/P60 family protein	T
NC_008611	MUL_1488	26	1611441	C	T	NON	S	L	1	transcriptional regulatory protein, MoxR1	Detected in the cytoplamic and membrane fractions by LC-MS/MS. Also detected in the extracellular matrix by proteomics. membrane protein involved in transcriptional mechanism.	T
NC_008611	MUL_1489	312	1612857	T	C	SYN	D	D	1	hypothetical protein	Detected in the membrane fraction by proteomics (LC- MS/MS) membrane protein	C
NC_008611	MUL_1490	699	1614235	A	G	SYN	K	K	1	membrane protein	Detected in the membrane fraction by proteomics (LC- MS/MS) membrane protein	G
NC_008611	MUL_1490	955	1614491	T	C	SYN	L	L	1	membrane protein	Detected in the membrane fraction by proteomics (LC- MS/MS) membrane protein	C
NC_008611	MUL_1490	963	1614499	A	G	SYN	A	A	1	membrane protein	Detected in the membrane fraction by proteomics (LC- MS/MS) membrane protein
NC_008611	MUL_1493	934	1617254	T	C	NON	S	P	1	ferrochelatase HemZ	membrane protein involved in protoheme biosynthesis (last step) catalyzes the insertion of ferrous iron into protoporphyrin ix to form protoheme [catalytic activity : protoporphyrin + fe(2+) = protoheme + 2 H(+)]	C
NC_008611	MUL_1496	120	1619923	G	C	NON	R	S	1	hypothetical protein	membrane protein function unknown. contains Cdd match to COG1585, COG1585, membrane protein implicated in regulation of membrane protease activity [posttranslational modification, protein turnover, chaperones / intracellular trafficking and secretion]	C
NC_008611	MUL_1505	1026	1629054	G	A	SYN	V	V	1	methylmalonyl-CoA mutase small subunit, MutA	membrane protein involved in propionic acid fermentation. catalyzes the isomerization of succinyl-CoA to methylmalonyl-CoA during synthesis of propionate from tricarboxylic acid- cycle intermediates [catalytic activity: (R)-2-methyl-3- oxopropanoyl-CoA = succinyl- CoA]	A
NC_008611	MUL_1505	1545	1629573	G	T	NON	M	I	1	methylmalonyl-CoA mutase small subunit, MutA	membrane protein involved in propionic acid fermentation. catalyzes the isomerization of succinyl-CoA to methylmalonyl-CoA during synthesis of propionate from tricarboxylic acid- cycle intermediates [catalytic activity: (R)-2-methyl-3- oxopropanoyl-CoA = succinyl- CoA]	T
NC_008611	MUL_1506	1571	1631482	T	G	NON	V	G	1	methylmalonyl-CoA mutase large subunit, MutB	membrane protein involved in propionic acid fermentation. catalyzes the isomerization of succinyl-CoA to methylmalonyl-CoA during synthesis of propionate from tricarboxylic acid- cycle intermediates [catalytic activity : (R)-2-methyl-3- oxopropanoyl-CoA = succinyl- CoA]
NC_008611	MUL_1507	636	1632897	G	A	SYN	A	A	1	LAO/AO transport system kinase	membrane protein possibly involved in transport (possibly arginine) contains Cdd pfam03308, ArgK, ArgK protein. the ArgK protein acts as an ATPase enzyme and as a kinase, and phosphorylates periplasmic binding proteins involved in the lao (lysine, arginine, ornithine)/AO transport systems	A
NC_008611	MUL_1507	653	1632914	A	G	NON	E	G	1	LAO/AO transport system kinase	membrane protein possibly involved in transport (possibly arginine) contains Cdd pfam03308, ArgK, ArgK protein. the ArgK protein acts as an ATPase enzyme and as a kinase, and phosphorylates periplasmic binding proteins involved in the lao (lysine, arginine, ornithine)/AO transport systems	G
NC_008611	MUL_1507	732	1632993	A	G	SYN	E	E	1	LAO/AO transport system kinase	membrane protein possibly involved in transport (possibly arginine) contains Cdd pfam03308, ArgK, ArgK protein. the ArgK protein acts as an ATPase enzyme and as a kinase, and phosphorylates periplasmic binding proteins involved in the lao (lysine, arginine, ornithine)/AO transport systems	G
NC_008611	MUL_1507	754	1633015	G	T	NON	G	W	1	LAO/AO transport system kinase	membrane protein possibly involved in transport (possibly arginine) contains Cdd pfam03308, ArgK, ArgK protein. the ArgK protein acts as an ATPase enzyme and as a kinase, and phosphorylates periplasmic binding proteins involved in the lao (lysine, arginine, ornithine)/AO transport systems	T
NC_008611	MUL_1523	190	1646753	C	T	NON	L	F	1	rhamnosyl transferase WbbL2	membrane protein possibly involved in cell wall arabinogalactan linker formation: uses dTDP-L-rhamnose as substrate to insert the rhamnosyl residue into the cell wall	T
NC_008611	MUL_1523	678	1647241	T	G	SYN	R	R	1	rhamnosyl transferase WbbL2	membrane protein possibly involved in cell wall arabinogalactan linker formation: uses dTDP-L-rhamnose as substrate to insert the rhamnosyl residue into the cell wall	G
NC_008611	MUL_1523	685	1647248	T	C	NON	C	R	1	rhamnosyl transferase WbbL2	membrane protein possibly involved in cell wall arabinogalactan linker formation: uses dTDP-L-rhamnose as substrate to insert the rhamnosyl residue into the cell wall
NC_008611	MUL_1523	722	1647285	T	C	NON	V	A	1	rhamnosyl transferase WbbL2	membrane protein possibly involved in cell wall arabinogalactan linker formation: uses dTDP-L-rhamnose as substrate to insert the rhamnosyl residue into the cell wall	C
NC_008611	MUL_1534	75	1660742	A	C	NON	F	L	-1	hypothetical protein	cytoplasmic protein function unknown. partial Cdd COG0030, KsgA, dimethyladenosine transferase (rRNA methylation) [translation, ribosomal structure and biogenesis]	C
NC_008611	MUL_1549	392	1677739	G	A	NON	R	K	1	hypothetical protein	Detected in the cytoplasmic and secreted fractions by 2D-LC-MS/MS. secreted protein function unknown. contains Cdd pfam04075, domain of unknown function (DUF385) family of mycobacterium tuberculosis proteins.	A
NC_008611	MUL_1551	135	1679599	A	G	SYN	G	G	-1	hypothetical protein	cytoplasmic protein	G
NC_008611	MUL_1562	150	1694703	T	C	SYN	S	S	1	hypothetical protein	membrane protein	C
NC_008611	MUL_1577	176	1708418	T	A	NON	V	E	1	inositol-monophosphatase ImpA	cytoplasmic protein involved in inositol phosphate metabolism. it is responsible for the provision of inositol required for synthesis of phosphatidylinositol and polyphosphoinositides. key enzyme of the phosphatidyl inositol signaling pathway [catalytic activity: inositol 1(or 4)-monophosphate + H(2)O = inositol + orthophosphate]	A
NC_008611	MUL_1580	784	1710605	G	C	NON	L	V	-1	deacylase	cytoplasmic protein function unknown.	C
NC_008611	MUL_1620	354	1759947	C	G	NON	I	M	1	hypothetical protein	Also detected in the extracellular matrix by proteomics. cytoplasmic protein	G
NC_008611	MUL_1629	19	1772145	T	G	NON	S	A	1	50S ribosomal protein L20 RplT	Detected in the cytoplasmic fraction by 2D-LC- MS/MS. cytoplasmic protein this protein binds directly to 23S ribosomal RNA and is necessary to the in vitro assembly process of the 50S ribosomal subunit; it is not involved in the protein synthesizing functions of that subunit.	G
NC_008611	MUL_1640	631	1787707	A	G	NON	T	A	1	PE-PGRS family protein	membrane protein function unknown.	G
NC_008611	MUL_1644	589	1795840	C	G	NON	L	V	1	N-acetyl-gamma-glutamyl-phosphate reductase ArgC	cytoplasmic protein involved in arginine biosynthesis (at the third step) [catalytic activity : N-acetyl-L-glutamate 5- semialdehyde + NADP(+) + phosphate = N-acetyl-5-glutamyl phosphate + NADPH]	G
NC_008611	MUL_1644	705	1795956	C	T	SYN	V	V	1	N-acetyl-gamma-glutamyl-phosphate reductase ArgC	cytoplasmic protein involved in arginine biosynthesis (at the third step) [catalytic activity : N-acetyl-L-glutamate 5- semialdehyde + NADP(+) + phosphate = N-acetyl-5-glutamyl phosphate + NADPH]	T
NC_008611	MUL_1655	374	1818234	C	A	NON	A	D	1	polyketide synthase Pks9	membrane protein
NC_008611	MUL_1655	380	1818240	A	G	NON	D	G	1	polyketide synthase Pks9	membrane protein	G
NC_008611	MUL_1655	771	1818631	C	G	SYN	A	A	1	polyketide synthase Pks9	membrane protein
NC_008611	MUL_1655	802	1818662	T	C	SYN	L	L	1	polyketide synthase Pks9	membrane protein
NC_008611	MUL_1655	1506	1819366	T	C	SYN	G	G	1	polyketide synthase Pks9	membrane protein	C
NC_008611	MUL_1655	1680	1819540	C	T	SYN	R	R	1	polyketide synthase Pks9	membrane protein	T
NC_008611	MUL_1655	1870	1819730	T	A	NON	S	T	1	polyketide synthase Pks9	membrane protein	A
NC_008611	MUL_1655	1886	1819746	C	T	NON	A	V	1	polyketide synthase Pks9	membrane protein	T
NC_008611	MUL_1658	1768	1823448	G	A	NON	R	*	-1	ABC transporter, ATP-binding protein	cytoplasmic protein thought to be involved in active transport of macrolide across the membrane (export) macrolide antibiotics resistance by an export mechanism. responsible for energy coupling to the transport system	A
NC_008611	MUL_1658	650	1824566	C	T	NON	G	E	-1	ABC transporter, ATP-binding protein	cytoplasmic protein thought to be involved in active transport of macrolide across the membrane (export) macrolide antibiotics resistance by an export mechanism. responsible for energy coupling to the transport system	T
NC_008611	MUL_1677	649	1848162	G	C	NON	R	G	-1	hypothetical protein	cytoplasmic protein	C
NC_008611	MUL_1677	359	1848452	A	G	NON	V	A	-1	hypothetical protein	cytoplasmic protein	G
NC_008611	MUL_1677	215	1848596	C	G	NON	S	T	-1	hypothetical protein	cytoplasmic protein	G
NC_008611	MUL_1682	86	1853032	T	C	NON	L	P	1	hypothetical protein	cytoplasmic protein	C
NC_008611	MUL_1691	174	1862846	C	G	NON	Q	H	-1	O-methyltransferase	cytoplasmic protein catalyzes the O-methylation [catalytic activity: S- adenosyl-L-methionine + catechol = S-adenosyl-L- homocysteine + guaiacol]
NC_008611	MUL_1712	176	1889017	C	G	NON	R	P	-1	hypothetical protein	membrane protein
NC_008611	MUL_1713	492	1889319	A	C	NON	D	E	-1	hypothetical protein	Detected in the cytoplasmic fraction by 2D-LC- MS/MS. cytoplasmic protein	C
NC_008611	MUL_1713	11	1889800	C	A	NON	R	L	-1	hypothetical protein	Detected in the cytoplasmic fraction by 2D-LC- MS/MS. cytoplasmic protein	A
NC_008611	MUL_1718	1427	1894123	G	C	NON	A	G	-1	PE-PGRS family protein	membrane protein
NC_008611	MUL_1718	1089	1894461	C	G	SYN	T	T	-1	PE-PGRS family protein	membrane protein	G
NC_008611	MUL_1718	723	1894827	A	G	SYN	G	G	-1	PE-PGRS family protein	membrane protein
NC_008611	MUL_1718	703	1894847	C	A	NON	D	Y	-1	PE-PGRS family protein	membrane protein
NC_008611	MUL_1718	269	1895281	G	A	NON	A	V	-1	PE-PGRS family protein	membrane protein	A
NC_008611	MUL_1718	251	1895299	C	G	NON	G	A	-1	PE-PGRS family protein	membrane protein	G
NC_008611	MUL_1718	226	1895324	G	A	NON	L	F	-1	PE-PGRS family protein	membrane protein	A
NC_008611	MUL_1719	363	1896103	T	C	SYN	V	V	1	hypothetical membrane protein	Detected in the membrane fraction by proteomics (LC- MS/MS) membrane protein function unknown, domain identity membrane protein Cdd COG3759	C
NC_008611	MUL_1720	104	1896323	C	T	NON	T	I	1	hypothetical secreted protein	secreted protein	T
NC_008611	MUL_1720	132	1896351	C	G	NON	F	L	1	hypothetical secreted protein	secreted protein	G
NC_008611	MUL_1721	230	1898381	C	A	NON	C	F	-1	PE_PGRS family protein	membrane protein	A
NC_008611	MUL_1741	441	1924694	G	T	NON	N	K	-1	hypothetical protein	Detected in the membrane fraction by proteomics (LC- MS/MS) membrane protein	T
NC_008611	MUL_1741	367	1924768	G	A	SYN	L	L	-1	hypothetical protein	Detected in the membrane fraction by proteomics (LC- MS/MS) membrane protein	A
NC_008611	MUL_1741	347	1924788	G	A	NON	A	V	-1	hypothetical protein	Detected in the membrane fraction by proteomics (LC- MS/MS) membrane protein	A
NC_008611	MUL_1741	196	1924939	T	C	NON	I	V	-1	hypothetical protein	Detected in the membrane fraction by proteomics (LC- MS/MS) membrane protein	C
NC_008611	MUL_1742	356	1925538	A	G	NON	L	P	-1	ketopantoate reductase, ApbA_1	membrane protein contains Cdd pfam02558, a family of 2- dehydropantoate 2-reductases also known as ketopantoate reductases	G
NC_008611	MUL_1742	150	1925744	C	T	SYN	Q	Q	-1	ketopantoate reductase, ApbA_1	membrane protein contains Cdd pfam02558, a family of 2- dehydropantoate 2-reductases also known as ketopantoate reductases	T
NC_008611	MUL_1748	2431	1932057	C	T	NON	E	K	-1	conserved hypothetical alanine and leucine rich protein	membrane protein	T
NC_008611	MUL_1748	2362	1932126	G	A	SYN	L	L	-1	conserved hypothetical alanine and leucine rich protein	membrane protein	A
NC_008611	MUL_1748	1033	1933455	C	T	NON	A	T	-1	conserved hypothetical alanine and leucine rich protein	membrane protein	T
NC_008611	MUL_1748	1024	1933464	G	C	NON	L	V	-1	conserved hypothetical alanine and leucine rich protein	membrane protein
NC_008611	MUL_1748	992	1933496	A	C	NON	L	R	-1	conserved hypothetical alanine and leucine rich protein	membrane protein	C
NC_008611	MUL_1749	1650	1934539	C	T	SYN	V	V	-1	transglutaminase family protein	cytoplasmic protein function unknown, in general transglutaminases are enzymes that establish covalent links between proteins. a subset of transglutaminase homologues appear to catalyse the reverse reaction, the hydrolysis of peptide bonds.	T
NC_008611	MUL_1749	1382	1934807	A	C	NON	F	C	-1	transglutaminase family protein	cytoplasmic protein function unknown, in general transglutaminases are enzymes that establish covalent links between proteins. a subset of transglutaminase homologues appear to catalyse the reverse reaction, the hydrolysis of peptide bonds.	C
NC_008611	MUL_1749	1191	1934998	C	G	NON	Q	H	-1	transglutaminase family protein	cytoplasmic protein function unknown, in general transglutaminases are enzymes that establish covalent links between proteins. a subset of transglutaminase homologues appear to catalyse the reverse reaction, the hydrolysis of peptide bonds.
NC_008611	MUL_1749	534	1935655	T	C	SYN	R	R	-1	transglutaminase family protein	cytoplasmic protein function unknown, in general transglutaminases are enzymes that establish covalent links between proteins. a subset of transglutaminase homologues appear to catalyse the reverse reaction, the hydrolysis of peptide bonds.	C
NC_008611	MUL_1757	673	1945518	T	C	NON	S	P	1	shikimate 5-dehydrogenase AroE	membrane protein possibly involved at the fourth step in the biosynthesis of chorismate within the biosynthesis of aromatic amino acids (the shikimate pathway) [catalytic activity: shikimate + NADP(+) = 5-dehydroshikimate + NADPH]	C
NC_008611	MUL_1757	693	1945538	G	C	SYN	A	A	1	shikimate 5-dehydrogenase AroE	membrane protein possibly involved at the fourth step in the biosynthesis of chorismate within the biosynthesis of aromatic amino acids (the shikimate pathway) [catalytic activity: shikimate + NADP(+) = 5-dehydroshikimate + NADPH]
NC_008611	MUL_1788	279	1976527	T	C	SYN	H	H	1	guanylate kinase Gmk	Detected in the cytoplasmic fraction by proteomics. cytoplasmic protein essential for recycling GMP and indirectly, cGMP [catalytic activity : ATP + GMP = ADP + GDP]	C
NC_008611	MUL_1792	524	1980058	T	C	NON	D	G	-1	conserved hypothetical secreted protein	secreted protein	C
NC_008611	MUL_1793	1408	1980691	A	G	NON	Y	H	-1	monoxygenase	cytoplasmic protein function unknown, probably involved in cellular metabolism	G
NC_008611	MUL_1793	1124	1980975	C	G	NON	R	P	-1	monoxygenase	cytoplasmic protein function unknown, probably involved in cellular metabolism	G
NC_008611	MUL_1793	304	1981795	G	A	NON	L	F	-1	monoxygenase	cytoplasmic protein function unknown, probably involved in cellular metabolism	A
NC_008611	MUL_1798	91	1987787	C	T	NON	D	N	-1	methyltransferase	cytoplasmic protein causes methylation	T
NC_008611	MUL_1833	174	2028489	T	C	SYN	D	D	1	transcriptional regulatory protein (probably GntR-family)	Detected in the cytoplasmic fraction by 2D-LC- MS/MS. cytoplasmic protein possibly involved in transcriptional mechanism.	C
NC_008611	MUL_1833	287	2028602	G	A	NON	G	E	1	transcriptional regulatory protein (probably GntR-family)	Detected in the cytoplasmic fraction by 2D-LC- MS/MS. cytoplasmic protein possibly involved in transcriptional mechanism.	A
NC_008611	MUL_1835	12	2029802	A	G	SYN	A	A	-1	protein-export membrane protein (translocase subunit) SecG	membrane protein involved in protein export. participates in a early event of protein translocation.	G
NC_008611	MUL_1854	107	2054966	C	T	NON	T	M	1	transcriptional activator protein	cytoplasmic protein involved in transcriptional mechanism	T
NC_008611	MUL_1854	117	2054976	A	C	SYN	T	T	1	transcriptional activator protein	cytoplasmic protein involved in transcriptional mechanism
NC_008611	MUL_1854	118	2054977	G	C	NON	A	P	1	transcriptional activator protein	cytoplasmic protein involved in transcriptional mechanism
NC_008611	MUL_1854	571	2055430	C	T	NON	R	W	1	transcriptional activator protein	cytoplasmic protein involved in transcriptional mechanism	T
NC_008611	MUL_1854	771	2055630	T	G	NON	H	Q	1	transcriptional activator protein	cytoplasmic protein involved in transcriptional mechanism	G
NC_008611	MUL_1891	273	2093101	G	A	SYN	Q	Q	1	oxidoreductase	cytoplasmic protein function unknown, probably involved in cellular metabolism.	A
NC_008611	MUL_1907	728	2110123	T	C	NON	D	G	-1	DNA photolyase, PhrI	cytoplasmic protein function unknown, possible role in DNA replication, recombination, and repair.	C
NC_008611	MUL_1907	679	2110172	A	G	NON	Y	H	-1	DNA photolyase, PhrI	cytoplasmic protein function unknown, possible role in DNA replication, recombination, and repair.	G
NC_008611	MUL_1907	643	2110208	T	A	NON	R	W	-1	DNA photolyase, PhrI	cytoplasmic protein function unknown, possible role in DNA replication, recombination, and repair.	A
NC_008611	MUL_1907	597	2110254	C	T	SYN	T	T	-1	DNA photolyase, PhrI	cytoplasmic protein function unknown, possible role in DNA replication, recombination, and repair.	T
NC_008611	MUL_1946	111	2152048	A	G	SYN	P	P	1	hypothetical protein	cytoplasmic protein
NC_008611	MUL_1950	487	2155855	C	T	NON	A	T	-1	hypothetical protein	Detected in the membrane fraction by proteomics (LC- MS/MS) membrane protein	T
NC_008611	MUL_1950	251	2156091	C	T	NON	R	H	-1	hypothetical protein	Detected in the membrane fraction by proteomics (LC- MS/MS) membrane protein	T
NC_008611	MUL_1950	140	2156202	G	A	NON	S	F	-1	hypothetical protein	Detected in the membrane fraction by proteomics (LC- MS/MS) membrane protein	A
NC_008611	MUL_1952	745	2158566	T	C	NON	Y	H	1	D-3-phosphoglycerate dehydrogenase SerA1	Also detected in the extracellular matrix and membrane fraction by proteomics. cytoplasmic protein involved at the first committed step in the 'phosphorylated' pathway of L-serine biosynthesis [catalytic activity: 3-phosphoglycerate + NAD(+) = 3- phosphohydroxypyruvate + NADH]	C
NC_008611	MUL_1952	1057	2158878	G	C	NON	G	R	1	D-3-phosphoglycerate dehydrogenase SerA1	Also detected in the extracellular matrix and membrane fraction by proteomics. cytoplasmic protein involved at the first committed step in the 'phosphorylated' pathway of L-serine biosynthesis [catalytic activity: 3-phosphoglycerate + NAD(+) = 3- phosphohydroxypyruvate + NADH]	C
NC_008611	MUL_1952	1077	2158898	G	A	SYN	E	E	1	D-3-phosphoglycerate dehydrogenase SerA1	Also detected in the extracellular matrix and membrane fraction by proteomics. cytoplasmic protein involved at the first committed step in the 'phosphorylated' pathway of L-serine biosynthesis [catalytic activity: 3-phosphoglycerate + NAD(+) = 3- phosphohydroxypyruvate + NADH]	A
NC_008611	MUL_1956	25	2161979	G	C	NON	D	H	1	2-hydroxyhepta-2,4-diene-1,7-dioate isomerase	cytoplasmic protein isomerizes HHDD (2-hydroxy-hept-2,4-diene-1,7- dioate) to ohed (2-oxo-hept-3-ene-1,7-dioate)	C
NC_008611	MUL_1956	137	2162091	G	A	NON	G	D	1	2-hydroxyhepta-2,4-diene-1,7-dioate isomerase	cytoplasmic protein isomerizes HHDD (2-hydroxy-hept-2,4-diene-1,7- dioate) to ohed (2-oxo-hept-3-ene-1,7-dioate)	A
NC_008611	MUL_1957	634	2163367	T	C	NON	C	R	1	glutamyl-tRNA synthetase GltS	cytoplasmic protein involved in translation mechanisms [catalytic activity: ATP + L-glutamate + tRNA(Glu) = AMP + diphosphate + L-glutamyl-tRNA(Glu)]	C
NC_008611	MUL_1972	1827	2179568	T	C	SYN	S	S	-1	polyphosphate kinase Ppk	Detected in the membrane fraction by proteomics (2D- LC-MS/MS) membrane protein catalyzes the reversible transfer of the terminal phosphate of ATP to form a long-chain polyphosphate (polyp) [catalytic activity: ATP + {phosphate}(N) = ADP + {phosphate}(n+1)]	C
NC_008611	MUL_1972	1805	2179590	G	A	NON	T	I	-1	polyphosphate kinase Ppk	Detected in the membrane fraction by proteomics (2D- LC-MS/MS) membrane protein catalyzes the reversible transfer of the terminal phosphate of ATP to form a long-chain polyphosphate (polyp) [catalytic activity: ATP + {phosphate}(N) = ADP + {phosphate}(n+1)]	A
NC_008611	MUL_1972	757	2180638	G	C	NON	L	V	-1	polyphosphate kinase Ppk	Detected in the membrane fraction by proteomics (2D- LC-MS/MS) membrane protein catalyzes the reversible transfer of the terminal phosphate of ATP to form a long-chain polyphosphate (polyp) [catalytic activity: ATP + {phosphate}(N) = ADP + {phosphate}(n+1)]	C
NC_008611	MUL_1972	411	2180984	G	C	NON	S	R	-1	polyphosphate kinase Ppk	Detected in the membrane fraction by proteomics (2D- LC-MS/MS) membrane protein catalyzes the reversible transfer of the terminal phosphate of ATP to form a long-chain polyphosphate (polyp) [catalytic activity: ATP + {phosphate}(N) = ADP + {phosphate}(n+1)]	C
NC_008611	MUL_1972	404	2180991	A	G	NON	I	T	-1	polyphosphate kinase Ppk	Detected in the membrane fraction by proteomics (2D- LC-MS/MS) membrane protein catalyzes the reversible transfer of the terminal phosphate of ATP to form a long-chain polyphosphate (polyp) [catalytic activity: ATP + {phosphate}(N) = ADP + {phosphate}(n+1)]
NC_008611	MUL_1972	401	2180994	T	C	NON	H	R	-1	polyphosphate kinase Ppk	Detected in the membrane fraction by proteomics (2D- LC-MS/MS) membrane protein catalyzes the reversible transfer of the terminal phosphate of ATP to form a long-chain polyphosphate (polyp) [catalytic activity: ATP + {phosphate}(N) = ADP + {phosphate}(n+1)]	C
NC_008611	MUL_1988	135	2195443	C	T	SYN	L	L	-1	hypothetical protein	cytoplasmic protein	T
NC_008611	MUL_1991	530	2198230	C	G	NON	A	G	1	conserved integral membrane protein	membrane protein
NC_008611	MUL_1997	736	2204665	C	T	NON	V	I	-1	hypothetical protein	membrane protein	T
NC_008611	MUL_1997	725	2204676	G	A	NON	P	L	-1	hypothetical protein	membrane protein	A
NC_008611	MUL_1997	65	2205336	T	C	NON	E	G	-1	hypothetical protein	membrane protein	C
NC_008611	MUL_2003	60	2213560	A	T	NON	E	D	1	chorismate pyruvate-lyase	cytoplasmic protein responsible for the direct conversion of chorismate to p-hydroxybenzoate, the substrate used in the production of glycosylated p-hydroxybenzoic acid methyl esters and structurally related phenolphthiocerol glycolipids. in M. tuberculosis, this is the sole enzymatic source of p- hydroxybenzoic acid.	T
NC_008611	MUL_2003	240	2213740	T	C	SYN	R	R	1	chorismate pyruvate-lyase	cytoplasmic protein responsible for the direct conversion of chorismate to p-hydroxybenzoate, the substrate used in the production of glycosylated p-hydroxybenzoic acid methyl esters and structurally related phenolphthiocerol glycolipids. in M. tuberculosis, this is the sole enzymatic source of p- hydroxybenzoic acid.	C
NC_008611	MUL_2003	273	2213773	T	C	SYN	I	I	1	chorismate pyruvate-lyase	cytoplasmic protein responsible for the direct conversion of chorismate to p-hydroxybenzoate, the substrate used in the production of glycosylated p-hydroxybenzoic acid methyl esters and structurally related phenolphthiocerol glycolipids. in M. tuberculosis, this is the sole enzymatic source of p- hydroxybenzoic acid.	C
NC_008611	MUL_2034	603	2280891	G	A	SYN	G	G	1	cell division protein FtsY	membrane protein probably involved in the reception and insertion of a subset of proteins at the membrane: possibly membrane receptor for Ffh.	A
NC_008611	MUL_2034	1024	2281312	A	G	NON	I	V	1	cell division protein FtsY	membrane protein probably involved in the reception and insertion of a subset of proteins at the membrane: possibly membrane receptor for Ffh.	G
NC_008611	MUL_2034	1254	2281542	G	C	SYN	V	V	1	cell division protein FtsY	membrane protein probably involved in the reception and insertion of a subset of proteins at the membrane: possibly membrane receptor for Ffh.	C
NC_008611	MUL_2034	1275	2281563	G	C	SYN	L	L	1	cell division protein FtsY	membrane protein probably involved in the reception and insertion of a subset of proteins at the membrane: possibly membrane receptor for Ffh.	C
NC_008611	MUL_2040	1077	2289507	T	G	SYN	L	L	1	signal recognition particle protein Ffh	Also detected in the cytoplasmic fraction by 2D-LC- MS/MS cytoplasmic protein necessary for efficient export of extra-cytoplasmic proteins. binds to the signal sequence when it emerges from the ribosomes.	G
NC_008611	MUL_2040	1466	2289896	T	C	NON	L	P	1	signal recognition particle protein Ffh	Also detected in the cytoplasmic fraction by 2D-LC- MS/MS cytoplasmic protein necessary for efficient export of extra-cytoplasmic proteins. binds to the signal sequence when it emerges from the ribosomes.
NC_008611	MUL_2040	1483	2289913	T	C	SYN	L	L	1	signal recognition particle protein Ffh	Also detected in the cytoplasmic fraction by 2D-LC- MS/MS cytoplasmic protein necessary for efficient export of extra-cytoplasmic proteins. binds to the signal sequence when it emerges from the ribosomes.	C
NC_008611	MUL_2069	1182	2317052	T	C	SYN	Y	Y	1	amidase AmiC	cytoplasmic protein hydrolyzes a monocarboxylic acid amide and generates a monocarboxylate [catalytic activity: a monocarboxylic acid amide + H(2)O = a monocarboxylate + NH(3)]	C
NC_008611	MUL_2073	485	2319822	T	C	NON	H	R	-1	transcriptional regulatory protein	cytoplasmic protein involved in transcriptional mechanism	C
NC_008611	MUL_2073	381	2319926	C	T	SYN	P	P	-1	transcriptional regulatory protein	cytoplasmic protein involved in transcriptional mechanism	T
NC_008611	MUL_2074	22	2320507	T	C	NON	F	L	1	uridylate kinase PyrH	Also detected in the membrane fraction by proteomics (2D-LC-MS/MS) cytoplasmic protein uridine monophosphate kinase [catalytic activity: ATP + ump = ADP + UDP]	C
NC_008611	MUL_2076	868	2323078	T	C	SYN	L	L	1	integral membrane phosphatidate cytidylyltransferase CdsA	membrane protein involved in the phospholipid biosynthesis [catalytic activity: CTP + phosphatidate = pyrophosphate + CDP-diacylglycerol]
NC_008611	MUL_2078	213	2324443	C	G	SYN	A	A	1	hypothetical protein	cytoplasmic protein	G
NC_008611	MUL_2080	281	2326272	C	T	NON	S	L	1	conserved integral membrane protein	membrane protein function unknown, possibly involved in transport of mercury across the membrane.	T
NC_008611	MUL_2081	392	2327271	A	G	NON	H	R	1	hypothetical protein	cytoplasmic protein	G
NC_008611	MUL_2090	88	2337867	A	G	NON	T	A	1	hypothetical protein	cytoplasmic protein	G
NC_008611	MUL_2090	354	2338133	C	G	SYN	P	P	1	hypothetical protein	cytoplasmic protein
NC_008611	MUL_2101	40	2348945	G	A	NON	D	N	1	hypothetical protein	cytoplasmic protein
NC_008611	MUL_2101	77	2348982	G	C	NON	C	S	1	hypothetical protein	cytoplasmic protein	C
NC_008611	MUL_2145	421	2394468	A	C	NON	S	A	-1	transcriptional repressor SirR	cytoplasmic protein involved in transcriptional mechanism.	C
NC_008611	MUL_2145	361	2394528	T	C	NON	T	A	-1	transcriptional repressor SirR	cytoplasmic protein involved in transcriptional mechanism.	C
NC_008611	MUL_2146	17	2395085	G	A	NON	G	D	1	bifunctional fad synthetase/riboflavin biosynthesis protein RibF	cytoplasmic protein involved in fad biosynthesis [catalytic activity 1: ATP + riboflavin = ADP + FMN] [catalytic activity 2: ATP + FMN = diphosphate + fad]
NC_008611	MUL_2149	171	2397189	G	A	SYN	R	R	1	hypothetical protein	cytoplasmic protein	A
NC_008611	MUL_2149	302	2397320	T	A	NON	I	N	1	hypothetical protein	cytoplasmic protein	A
NC_008611	MUL_2160	434	2410197	C	T	NON	G	D	-1	hypothetical protein	cytoplasmic protein	T
NC_008611	MUL_2161	907	2411657	A	G	NON	T	A	1	oxidoreductase	cytoplasmic protein function unknown, probably involved in cellular metabolism.	G
NC_008611	MUL_2161	982	2411732	A	G	NON	S	G	1	oxidoreductase	cytoplasmic protein function unknown, probably involved in cellular metabolism.
NC_008611	MUL_2162	811	2412657	C	T	NON	Q	*	1	hypothetical protein	cytoplasmic protein	T
NC_008611	MUL_2162	852	2412698	C	T	SYN	I	I	1	hypothetical protein	cytoplasmic protein	T
NC_008611	MUL_2209	552	2470963	C	A	SYN	G	G	1	oxidoreductase	cytoplasmic protein thought to be involved in fatty acid degradation. FadB and FadA are the alpha and BetA subunits of the multifunctional enzyme complex of the fatty acid degradation cycle.	A
NC_008611	MUL_2209	615	2471026	T	C	SYN	Y	Y	1	oxidoreductase	cytoplasmic protein thought to be involved in fatty acid degradation. FadB and FadA are the alpha and BetA subunits of the multifunctional enzyme complex of the fatty acid degradation cycle.	C
NC_008611	MUL_2209	744	2471155	G	T	SYN	V	V	1	oxidoreductase	cytoplasmic protein thought to be involved in fatty acid degradation. FadB and FadA are the alpha and BetA subunits of the multifunctional enzyme complex of the fatty acid degradation cycle.
NC_008611	MUL_2232	276	2489089	A	G	SYN	V	V	1	molecular chaperone (small heat shock protein)	Also detected in the extracellular matrix by proteomics, and in the membrane fraction. cytoplasmic protein function unknown. may be involved in a chaperoning process.	G
NC_008611	MUL_2239	490	2494334	C	T	NON	V	M	-1	hypothetical protein	membrane protein function unknown. possibly involved in lipid metabolism.	T
NC_008611	MUL_2245	365	2497505	G	A	NON	S	L	-1	PPE family protein	membrane protein	A
NC_008611	MUL_2245	246	2497624	G	C	NON	A	V	-1	PPE family protein	membrane protein
NC_008611	MUL_2245	245	2497625	G	A	NON	A	V	-1	PPE family protein	membrane protein
NC_008611	MUL_2245	213	2497657	G	C	NON	N	K	-1	PPE family protein	membrane protein	C
NC_008611	MUL_2252	502	2506169	T	C	NON	T	A	-1	sugar-transport ATP-binding protein ABC transporter	membrane protein thought to be involved in active transport of sugar across the membrane (import) responsible for energy coupling to the transport system.	C
NC_008611	MUL_2252	296	2506375	C	T	NON	G	E	-1	sugar-transport ATP-binding protein ABC transporter	membrane protein thought to be involved in active transport of sugar across the membrane (import) responsible for energy coupling to the transport system.	T
NC_008611	MUL_2257	139	2511074	C	T	NON	A	T	-1	pyrazinamidase/nicotinamidase, PncA	cytoplasmic protein converts amides such as nicotinamide to corresponding acid.	T
NC_008611	MUL_2263	284	2517510	C	G	NON	P	R	1	hypothetical protein	cytoplasmic protein	G
NC_008611	MUL_2263	303	2517529	G	C	SYN	P	P	1	hypothetical protein	cytoplasmic protein	C
NC_008611	MUL_2265	2648	2518568	G	C	NON	A	G	-1	hypothetical protein	Also detected in the cytoplasmic fraction by 2D-LC- MS/MS. membrane protein	C
NC_008611	MUL_2265	51	2521165	G	A	SYN	A	A	-1	hypothetical protein	Also detected in the cytoplasmic fraction by 2D-LC- MS/MS. membrane protein	A
NC_008611	MUL_2269	446	2535427	T	C	NON	Q	R	-1	C-term polyprenol-monophosphomannose synthase Ppm1B	This gene in two parts compared with MTB orthologue. Potential pseudogene but given same arrangement in M. marinum then this possibility seems less likely. cytoplasmic protein transfers mannose from GDP-mannose to all endogenous polyprenol-phosphates in mycobacterium tuberculosis	C
NC_008611	MUL_2279	1010	2550460	C	T	NON	G	D	-1	conserved membrane-bound oxidoreductase	Detected in the cytoplasmic fraction by 2D-LC- MS/MS. membrane protein	T
NC_008611	MUL_2279	985	2550485	T	C	NON	I	V	-1	conserved membrane-bound oxidoreductase	Detected in the cytoplasmic fraction by 2D-LC- MS/MS. membrane protein	C
NC_008611	MUL_2279	621	2550849	C	T	SYN	V	V	-1	conserved membrane-bound oxidoreductase	Detected in the cytoplasmic fraction by 2D-LC- MS/MS. membrane protein	T
NC_008611	MUL_2279	580	2550890	C	T	NON	V	I	-1	conserved membrane-bound oxidoreductase	Detected in the cytoplasmic fraction by 2D-LC- MS/MS. membrane protein	T
NC_008611	MUL_2284	251	2555144	T	C	NON	D	G	-1	hypothetical protein	cytoplasmic protein function unknown. contains adenylate cyclase domain
NC_008611	MUL_2284	234	2555161	C	T	SYN	L	L	-1	hypothetical protein	cytoplasmic protein function unknown. contains adenylate cyclase domain
NC_008611	MUL_2300	288	2572480	A	G	SYN	V	V	1	hypothetical protein	Detected in the cytoplasmic fraction by 2D-LC- MS/MS. Also detected in the membrane fraction by proteomics (LC-MS/MS) cytoplasmic protein	G
NC_008611	MUL_2305	2127	2577341	T	C	SYN	Q	Q	-1	hypothetical protein	cytoplasmic protein	C
NC_008611	MUL_2305	2071	2577397	A	C	NON	Y	D	-1	hypothetical protein	cytoplasmic protein
NC_008611	MUL_2305	2024	2577444	A	G	NON	L	P	-1	hypothetical protein	cytoplasmic protein
NC_008611	MUL_2305	1042	2578426	G	A	SYN	L	L	-1	hypothetical protein	cytoplasmic protein	A
NC_008611	MUL_2305	1030	2578438	G	T	NON	P	T	-1	hypothetical protein	cytoplasmic protein	T
NC_008611	MUL_2312	930	2585980	A	G	SYN	G	G	1	hypothetical protein	cytoplasmic protein	G
NC_008611	MUL_2315	871	2590755	A	G	NON	C	R	-1	conserved hypothetical alanine and proline rich protein	cytoplasmic protein	G
NC_008611	MUL_2315	611	2591015	C	T	NON	R	H	-1	conserved hypothetical alanine and proline rich protein	cytoplasmic protein	T
NC_008611	MUL_2315	219	2591407	G	C	NON	D	E	-1	conserved hypothetical alanine and proline rich protein	cytoplasmic protein	C
NC_008611	MUL_2318	2526	2592624	C	T	SYN	E	E	-1	conserved alanine and proline rich protein	Detected in the cytoplasmic fraction by 2D-LC- MS/MS. cytoplasmic protein
NC_008611	MUL_2318	2150	2593000	C	G	NON	R	P	-1	conserved alanine and proline rich protein	Detected in the cytoplasmic fraction by 2D-LC- MS/MS. cytoplasmic protein	G
NC_008611	MUL_2318	941	2594209	T	G	NON	Q	P	-1	conserved alanine and proline rich protein	Detected in the cytoplasmic fraction by 2D-LC- MS/MS. cytoplasmic protein	G
NC_008611	MUL_2318	933	2594217	C	G	NON	L	F	-1	conserved alanine and proline rich protein	Detected in the cytoplasmic fraction by 2D-LC- MS/MS. cytoplasmic protein	G
NC_008611	MUL_2318	582	2594568	C	T	SYN	Q	Q	-1	conserved alanine and proline rich protein	Detected in the cytoplasmic fraction by 2D-LC- MS/MS. cytoplasmic protein	T
NC_008611	MUL_2320	223	2597367	C	T	NON	A	T	-1	hypothetical protein	cytoplasmic protein
NC_008611	MUL_2321	761	2597993	G	A	NON	P	L	-1	dipeptidase PepE	Detected in the cytoplamic fraction by 2D-LC- MS/MS. cytoplasmic protein hydrolysis of peptide bonds	A
NC_008611	MUL_2321	393	2598361	T	C	SYN	V	V	-1	dipeptidase PepE	Detected in the cytoplamic fraction by 2D-LC- MS/MS. cytoplasmic protein hydrolysis of peptide bonds	C
NC_008611	MUL_2321	305	2598449	A	T	NON	V	E	-1	dipeptidase PepE	Detected in the cytoplamic fraction by 2D-LC- MS/MS. cytoplasmic protein hydrolysis of peptide bonds	T
NC_008611	MUL_2324	2275	2601199	G	A	SYN	L	L	-1	ATP-dependent DNA helicase HelY	Detected in the cytoplasmic fraction by 2D-LC- MS/MS. cytoplasmic protein DNA helicase activity.	A
NC_008611	MUL_2324	1510	2601964	G	C	NON	R	G	-1	ATP-dependent DNA helicase HelY	Detected in the cytoplasmic fraction by 2D-LC- MS/MS. cytoplasmic protein DNA helicase activity.
NC_008611	MUL_2324	993	2602481	G	C	NON	D	E	-1	ATP-dependent DNA helicase HelY	Detected in the cytoplasmic fraction by 2D-LC- MS/MS. cytoplasmic protein DNA helicase activity.	C
NC_008611	MUL_2324	987	2602487	C	G	NON	E	D	-1	ATP-dependent DNA helicase HelY	Detected in the cytoplasmic fraction by 2D-LC- MS/MS. cytoplasmic protein DNA helicase activity.
NC_008611	MUL_2324	60	2603414	A	G	SYN	D	D	-1	ATP-dependent DNA helicase HelY	Detected in the cytoplasmic fraction by 2D-LC- MS/MS. cytoplasmic protein DNA helicase activity.	G
NC_008611	MUL_2328	168	2606799	A	G	SYN	R	R	-1	hypothetical protein	Detected in the cytoplasmic fraction by 2D-LC- MS/MS. cytoplasmic protein contains domain homology to transcriptional regulators	G
NC_008611	MUL_2335	324	2613901	C	A	SYN	P	P	1	integral membrane protein	membrane protein	A
NC_008611	MUL_2335	677	2614254	A	G	NON	E	G	1	integral membrane protein	membrane protein	G
NC_008611	MUL_2335	908	2614485	C	G	NON	P	R	1	integral membrane protein	membrane protein	G
NC_008611	MUL_2335	919	2614496	G	C	NON	G	R	1	integral membrane protein	membrane protein	C
NC_008611	MUL_2336	402	2615008	T	C	SYN	D	D	1	hypothetical protein	cytoplasmic protein	C
NC_008611	MUL_2358	988	2645997	T	G	NON	S	R	-1	FAD-dependent oxidoreductase	membrane protein function unknown, probably involved in cellular metabolism.	G
NC_008611	MUL_2358	489	2646496	T	C	SYN	L	L	-1	FAD-dependent oxidoreductase	membrane protein function unknown, probably involved in cellular metabolism.	C
NC_008611	MUL_2358	82	2646903	A	G	NON	F	L	-1	FAD-dependent oxidoreductase	membrane protein function unknown, probably involved in cellular metabolism.	G
NC_008611	MUL_2359	21	2647879	T	C	SYN	K	K	-1	dehydrogenase	cytoplasmic protein	C
NC_008611	MUL_2361	742	2650169	A	G	NON	T	A	1	succinate-semialdehyde dehydrogenase [NADP+] dependent, GabD1_1	cytoplasmic protein involved in 4-aminobutyrate (GabA) degradation pathway [catalytic activity: succinate semialdehyde + NAD(P)(+) + H(2)O = succinate + NAD(P)H]	G
NC_008611	MUL_2361	932	2650359	T	C	NON	L	P	1	succinate-semialdehyde dehydrogenase [NADP+] dependent, GabD1_1	cytoplasmic protein involved in 4-aminobutyrate (GabA) degradation pathway [catalytic activity: succinate semialdehyde + NAD(P)(+) + H(2)O = succinate + NAD(P)H]	C
NC_008611	MUL_2361	1004	2650431	G	A	NON	R	H	1	succinate-semialdehyde dehydrogenase [NADP+] dependent, GabD1_1	cytoplasmic protein involved in 4-aminobutyrate (GabA) degradation pathway [catalytic activity: succinate semialdehyde + NAD(P)(+) + H(2)O = succinate + NAD(P)H]	A
NC_008611	MUL_2363	80	2652682	T	C	NON	D	G	-1	hypothetical protein	cytoplasmic protein	C
NC_008611	MUL_2370	46	2656921	T	C	NON	W	R	1	dihydroorotate dehydrogenase PyrD	cytoplasmic protein involved in pyrimidine biosynthesis	C
NC_008611	MUL_2371	597	2658762	A	G	SYN	G	G	-1	hypothetical protein	cytoplasmic protein	G
NC_008611	MUL_2371	202	2659157	G	C	NON	P	A	-1	hypothetical protein	cytoplasmic protein	C
NC_008611	MUL_2371	181	2659178	C	G	NON	V	L	-1	hypothetical protein	cytoplasmic protein	G
NC_008611	MUL_2372	444	2659569	G	A	SYN	D	D	-1	hypothetical protein	Also detected in the extracellular matrix by proteomics. cytoplasmic protein function unknown but contains bacterial/archael phosphatidylethanolamine-binding (PEBP) domain	A
NC_008611	MUL_2373	574	2660821	G	C	NON	L	V	-1	hypothetical protein	Also detected in the membrane fraction by proteomics (2D-LC-MS/MS) cytoplasmic protein function unknown - but has domain identity with cetylornithine deacetylase/succinyl-diaminopimelate desuccinylase and related deacylases [amino acid transport and metabolism]	C
NC_008611	MUL_2373	198	2661197	A	G	SYN	G	G	-1	hypothetical protein	Also detected in the membrane fraction by proteomics (2D-LC-MS/MS) cytoplasmic protein function unknown - but has domain identity with cetylornithine deacetylase/succinyl-diaminopimelate desuccinylase and related deacylases [amino acid transport and metabolism]	G
NC_008611	MUL_2383	147	2669110	A	C	SYN	L	L	-1	conserved membrane protein MmpS4	membrane protein
NC_008611	MUL_2391	644	2675304	T	C	NON	Q	R	-1	hypothetical protein	membrane protein	C
NC_008611	MUL_2391	462	2675486	T	C	SYN	L	L	-1	hypothetical protein	membrane protein	C
NC_008611	MUL_2391	210	2675738	T	C	SYN	E	E	-1	hypothetical protein	membrane protein	C
NC_008611	MUL_2391	205	2675743	C	T	NON	D	N	-1	hypothetical protein	membrane protein
NC_008611	MUL_2408	32	2691449	C	A	NON	R	L	-1	cell division protein FtsX	Detected in the membrane fraction by proteomics (LC- MS/MS) membrane protein involved in growth (principally during log phase cells) thought to be involved in active transport of septation component across the membrane. responsible for the translocation of the substrate across the membrane. coded for in an operon essential for ce	A
NC_008611	MUL_2410	407	2692309	G	A	NON	T	I	-1	hypothetical protein	membrane protein function unknown: predicted solute binding protein
NC_008611	MUL_2416	905	2699961	C	T	NON	R	K	-1	hypothetical protein	cytoplasmic protein
NC_008611	MUL_2416	204	2700662	C	T	SYN	Q	Q	-1	hypothetical protein	cytoplasmic protein	T
NC_008611	MUL_2424	551	2708200	T	C	NON	D	G	-1	hypothetical protein	membrane protein may play a role in the adaptation to hypoxia, participating in the phosphorelay in the two component regulatory system DevR/DevS	C
NC_008611	MUL_2424	333	2708418	A	G	SYN	N	N	-1	hypothetical protein	membrane protein may play a role in the adaptation to hypoxia, participating in the phosphorelay in the two component regulatory system DevR/DevS	G
NC_008611	MUL_2431	491	2717082	C	T	NON	A	V	1	acyl-CoA dehydrogenase FadE24	cytoplasmic protein function unknown, but involved in lipid degradation.	T
NC_008611	MUL_2431	685	2717276	A	G	NON	T	A	1	acyl-CoA dehydrogenase FadE24	cytoplasmic protein function unknown, but involved in lipid degradation.	G
NC_008611	MUL_2431	1096	2717687	A	G	NON	K	E	1	acyl-CoA dehydrogenase FadE24	cytoplasmic protein function unknown, but involved in lipid degradation.	G
NC_008611	MUL_2452	77	2740448	C	T	NON	T	I	1	hypothetical protein	Detected in the membrane fraction by proteomics (LC- MS/MS) membrane protein	T
NC_008611	MUL_2452	193	2740564	A	G	NON	K	E	1	hypothetical protein	Detected in the membrane fraction by proteomics (LC- MS/MS) membrane protein	G
NC_008611	MUL_2481	597	2770979	T	C	SYN	P	P	-1	short-chain type dehydrogenase/reductase	cytoplasmic protein function unknown, possibly involved in cellular metabolism.	C
NC_008611	MUL_2481	96	2771480	C	T	SYN	V	V	-1	short-chain type dehydrogenase/reductase	cytoplasmic protein function unknown, possibly involved in cellular metabolism.	T
NC_008611	MUL_2490	307	2782504	A	C	NON	C	G	-1	hypothetical protein	cytoplasmic protein	C
NC_008611	MUL_2491	555	2783038	G	T	NON	C	*	-1	hypothetical protein	cytoplasmic protein	T
NC_008611	MUL_2491	554	2783039	C	T	NON	C	*	-1	hypothetical protein	cytoplasmic protein	T
NC_008611	MUL_2491	269	2783324	G	T	NON	T	K	-1	hypothetical protein	cytoplasmic protein	T
NC_008611	MUL_2493	95	2784477	T	G	NON	Q	P	-1	hypothetical protein	cytoplasmic protein	G
NC_008611	MUL_2493	83	2784489	T	C	NON	E	G	-1	hypothetical protein	cytoplasmic protein	C
NC_008611	MUL_2494	1069	2784997	C	T	NON	E	K	-1	citrate synthase I GltA1	cytoplasmic protein involved in tricarboxylic acid cycle (krebs cycle) [catalytic activity: citrate + CoA = acetyl-CoA + H2O + oxaloacetate]	T
NC_008611	MUL_2494	742	2785324	C	T	NON	E	K	-1	citrate synthase I GltA1	cytoplasmic protein involved in tricarboxylic acid cycle (krebs cycle) [catalytic activity: citrate + CoA = acetyl-CoA + H2O + oxaloacetate]	T
NC_008611	MUL_2494	736	2785330	C	T	NON	A	T	-1	citrate synthase I GltA1	cytoplasmic protein involved in tricarboxylic acid cycle (krebs cycle) [catalytic activity: citrate + CoA = acetyl-CoA + H2O + oxaloacetate]	T
NC_008611	MUL_2494	612	2785454	G	T	SYN	T	T	-1	citrate synthase I GltA1	cytoplasmic protein involved in tricarboxylic acid cycle (krebs cycle) [catalytic activity: citrate + CoA = acetyl-CoA + H2O + oxaloacetate]	T
NC_008611	MUL_2494	596	2785470	A	G	NON	V	A	-1	citrate synthase I GltA1	cytoplasmic protein involved in tricarboxylic acid cycle (krebs cycle) [catalytic activity: citrate + CoA = acetyl-CoA + H2O + oxaloacetate]	G
NC_008611	MUL_2496	457	2788111	C	G	NON	A	P	-1	hypothetical protein	Detected in the membrane fraction by proteomics (LC- MS/MS) cytoplasmic protein	G
NC_008611	MUL_2496	203	2788365	T	G	NON	E	A	-1	hypothetical protein	Detected in the membrane fraction by proteomics (LC- MS/MS) cytoplasmic protein	G
NC_008611	MUL_2500	1566	2792143	C	G	SYN	V	V	-1	arylsulfatase AtsD_1	cytoplasmic protein thought to play an important role in the mineralization of sulfates [catalytic activity: a phenol sulfate + H2O = a phenol + sulfate]	G
NC_008611	MUL_2500	863	2792846	C	T	NON	G	D	-1	arylsulfatase AtsD_1	cytoplasmic protein thought to play an important role in the mineralization of sulfates [catalytic activity: a phenol sulfate + H2O = a phenol + sulfate]	T
NC_008611	MUL_2500	103	2793606	G	C	NON	R	G	-1	arylsulfatase AtsD_1	cytoplasmic protein thought to play an important role in the mineralization of sulfates [catalytic activity: a phenol sulfate + H2O = a phenol + sulfate]	C
NC_008611	MUL_2506	786	2799617	A	C	SYN	V	V	-1	serine protease	secreted protein	C
NC_008611	MUL_2506	402	2800001	G	C	NON	D	E	-1	serine protease	secreted protein
NC_008611	MUL_2506	399	2800004	A	G	SYN	P	P	-1	serine protease	secreted protein	G
NC_008611	MUL_2508	155	2802092	G	A	NON	R	Q	1	hypothetical protein	cytoplasmic protein	A
NC_008611	MUL_2534	577	2832735	G	C	NON	A	P	1	conserved alanine and valine rich protein	Detected in the membrane fraction by proteomics (LC- MS/MS) membrane protein	C
NC_008611	MUL_2555	1330	2852080	T	C	NON	T	A	-1	hypothetical protein	membrane protein may be involved in regulation	C
NC_008611	MUL_2576	2200	2875427	G	C	NON	Q	E	-1	preprotein translocase SecA1 1 subunit	Detected in the membrane fraction by proteomics (2D- LC-MS/MS) membrane protein involved in protein export. interacts with the SecY/SecE subunits. SecA has a central role in coupling the hydrolysis of ATP to the transfer of pre-secretory periplasmic and outer membrane proteins across the membrane.	C
NC_008611	MUL_2576	1603	2876024	C	G	NON	G	R	-1	preprotein translocase SecA1 1 subunit	Detected in the membrane fraction by proteomics (2D- LC-MS/MS) membrane protein involved in protein export. interacts with the SecY/SecE subunits. SecA has a central role in coupling the hydrolysis of ATP to the transfer of pre-secretory periplasmic and outer membrane proteins across the membrane.	G
NC_008611	MUL_2576	1209	2876418	G	A	SYN	D	D	-1	preprotein translocase SecA1 1 subunit	Detected in the membrane fraction by proteomics (2D- LC-MS/MS) membrane protein involved in protein export. interacts with the SecY/SecE subunits. SecA has a central role in coupling the hydrolysis of ATP to the transfer of pre-secretory periplasmic and outer membrane proteins across the membrane.	A
NC_008611	MUL_2576	987	2876640	C	T	SYN	E	E	-1	preprotein translocase SecA1 1 subunit	Detected in the membrane fraction by proteomics (2D- LC-MS/MS) membrane protein involved in protein export. interacts with the SecY/SecE subunits. SecA has a central role in coupling the hydrolysis of ATP to the transfer of pre-secretory periplasmic and outer membrane proteins across the membrane.
NC_008611	MUL_2576	983	2876644	C	T	NON	S	N	-1	preprotein translocase SecA1 1 subunit	Detected in the membrane fraction by proteomics (2D- LC-MS/MS) membrane protein involved in protein export. interacts with the SecY/SecE subunits. SecA has a central role in coupling the hydrolysis of ATP to the transfer of pre-secretory periplasmic and outer membrane proteins across the membrane.
NC_008611	MUL_2576	839	2876788	G	A	NON	A	V	-1	preprotein translocase SecA1 1 subunit	Detected in the membrane fraction by proteomics (2D- LC-MS/MS) membrane protein involved in protein export. interacts with the SecY/SecE subunits. SecA has a central role in coupling the hydrolysis of ATP to the transfer of pre-secretory periplasmic and outer membrane proteins across the membrane.	A
NC_008611	MUL_2576	834	2876793	C	G	NON	E	D	-1	preprotein translocase SecA1 1 subunit	Detected in the membrane fraction by proteomics (2D- LC-MS/MS) membrane protein involved in protein export. interacts with the SecY/SecE subunits. SecA has a central role in coupling the hydrolysis of ATP to the transfer of pre-secretory periplasmic and outer membrane proteins across the membrane.
NC_008611	MUL_2576	234	2877393	A	G	SYN	R	R	-1	preprotein translocase SecA1 1 subunit	Detected in the membrane fraction by proteomics (2D- LC-MS/MS) membrane protein involved in protein export. interacts with the SecY/SecE subunits. SecA has a central role in coupling the hydrolysis of ATP to the transfer of pre-secretory periplasmic and outer membrane proteins across the membrane.	G
NC_008611	MUL_2576	227	2877400	C	T	NON	G	D	-1	preprotein translocase SecA1 1 subunit	Detected in the membrane fraction by proteomics (2D- LC-MS/MS) membrane protein involved in protein export. interacts with the SecY/SecE subunits. SecA has a central role in coupling the hydrolysis of ATP to the transfer of pre-secretory periplasmic and outer membrane proteins across the membrane.
NC_008611	MUL_2643	340	2953644	C	G	NON	V	L	-1	hypothetical protein	membrane protein	G
NC_008611	MUL_2681	338	3000951	C	A	NON	G	V	-1	chitinase	Detected in the cytoplamic fraction by LCMSMS cytoplasmic protein function unknown, contains xylanase/chitin deacetylase domain	A
NC_008611	MUL_2698	64	3018561	T	C	NON	T	A	-1	transcription regulator (LysR family)	cytoplasmic protein	C
NC_008611	MUL_2703	320	3022479	C	T	NON	G	E	-1	hypothetical protein	cytoplasmic protein function unknown but contains zinc binding domain found at the N-terminus of the ClpX protein. ClpX is an ATPase which functions both as a substrate specificity component of the ClpXP protease and as a molecular chaperone.	T
NC_008611	MUL_2719	583	3039391	C	T	NON	D	N	-1	CDP-diacylglycerol pyrophosphatase Cdh	secreted protein involved in phospholipid biosynthesis [catalytic activity: CDP-diacylglycerol + H(2)O = CMP + phosphatidate]	T
NC_008611	MUL_2719	525	3039449	G	A	SYN	V	V	-1	CDP-diacylglycerol pyrophosphatase Cdh	secreted protein involved in phospholipid biosynthesis [catalytic activity: CDP-diacylglycerol + H(2)O = CMP + phosphatidate]	A
NC_008611	MUL_2719	488	3039486	G	A	NON	S	L	-1	CDP-diacylglycerol pyrophosphatase Cdh	secreted protein involved in phospholipid biosynthesis [catalytic activity: CDP-diacylglycerol + H(2)O = CMP + phosphatidate]	A
NC_008611	MUL_2719	217	3039757	C	T	NON	G	S	-1	CDP-diacylglycerol pyrophosphatase Cdh	secreted protein involved in phospholipid biosynthesis [catalytic activity: CDP-diacylglycerol + H(2)O = CMP + phosphatidate]	T
NC_008611	MUL_2729	92	3048600	C	T	NON	S	L	1	hypothetical protein	membrane protein	T
NC_008611	MUL_2729	674	3049182	C	G	NON	S	W	1	hypothetical protein	membrane protein	G
NC_008611	MUL_2743	1720	3067058	G	A	NON	L	F	-1	Transcriptional regulatory protein (LuxR- family)	cytoplasmic protein involved in transcriptional mechanism.	A
NC_008611	MUL_2743	1390	3067388	G	A	SYN	L	L	-1	Transcriptional regulatory protein (LuxR- family)	cytoplasmic protein involved in transcriptional mechanism.	A
NC_008611	MUL_2743	661	3068117	C	G	NON	E	Q	-1	Transcriptional regulatory protein (LuxR- family)	cytoplasmic protein involved in transcriptional mechanism.	G
NC_008611	MUL_2745	734	3071167	A	G	NON	I	T	-1	hypothetical protein	cytoplasmic protein	G
NC_008611	MUL_2745	413	3071488	A	G	NON	I	T	-1	hypothetical protein	cytoplasmic protein	G
NC_008611	MUL_2745	396	3071505	T	C	NON	I	M	-1	hypothetical protein	cytoplasmic protein	C
NC_008611	MUL_2753	9	3078436	G	C	NON	K	N	1	oxidoreductase	cytoplasmic protein function unknown, probably involved in cellular metabolism, possibly electron transfer.	C
NC_008611	MUL_2762	621	3084974	G	A	SYN	I	I	-1	transcriptional regulator (IclR family)	cytoplasmic protein involved in transcriptional mechanism.	A
NC_008611	MUL_2762	318	3085277	A	G	SYN	A	A	-1	transcriptional regulator (IclR family)	cytoplasmic protein involved in transcriptional mechanism.	G
NC_008611	MUL_2762	80	3085515	C	T	NON	G	D	-1	transcriptional regulator (IclR family)	cytoplasmic protein involved in transcriptional mechanism.	T
NC_008611	MUL_2783	1152	3108640	C	T	SYN	S	S	-1	PE-PGRS family protein	PE_PGRS39; membrane protein	T
NC_008611	MUL_2783	1105	3108687	T	A	NON	T	S	-1	PE-PGRS family protein	PE_PGRS39; membrane protein	A
NC_008611	MUL_2787	771	3113905	G	A	SYN	I	I	-1	hypothetical protein	membrane protein function unknown. possibly transporter involved in transport of undeterminated substrate (possibly cationic amino acids) across the membrane: so responsible for the translocation of the substrate across the membrane.	A
NC_008611	MUL_2787	551	3114125	C	T	NON	C	Y	-1	hypothetical protein	membrane protein function unknown. possibly transporter involved in transport of undeterminated substrate (possibly cationic amino acids) across the membrane: so responsible for the translocation of the substrate across the membrane.	T
NC_008611	MUL_2788	176	3115801	C	G	NON	C	S	-1	saccharopine dehydrogenase	cytoplasmic protein function unknown, high domain identity with saccharopine dehydrogenase. this family comprises three structural domains that can not be separated in the linear sequence. in some organisms this enzyme is found as a bifunctional polypeptide with lysine ketoglutarate.	G
NC_008611	MUL_2794	255	3121740	G	A	SYN	G	G	1	oxidoreductase	function unknown, probably involved in cellular metabolism	A
NC_008611	MUL_2794	264	3121749	G	T	SYN	G	G	1	oxidoreductase	function unknown, probably involved in cellular metabolism
NC_008611	MUL_2794	270	3121755	C	T	SYN	A	A	1	oxidoreductase	function unknown, probably involved in cellular metabolism	T
NC_008611	MUL_2794	662	3122147	T	C	NON	V	A	1	oxidoreductase	function unknown, probably involved in cellular metabolism	C
NC_008611	MUL_2794	689	3122174	T	C	NON	I	T	1	oxidoreductase	function unknown, probably involved in cellular metabolism	C
NC_008611	MUL_2794	709	3122194	C	A	NON	R	S	1	oxidoreductase	function unknown, probably involved in cellular metabolism	A
NC_008611	MUL_2797	1074	3123367	A	C	SYN	A	A	-1	quinone reductase, Qor_1	cytoplasmic protein catalyzes the one electron reduction of certain quinones [catalytic activity: NADPH + quinone = NADP+ + semiquinone]	C
NC_008611	MUL_2797	180	3124261	T	C	SYN	E	E	-1	quinone reductase, Qor_1	cytoplasmic protein catalyzes the one electron reduction of certain quinones [catalytic activity: NADPH + quinone = NADP+ + semiquinone]	C
NC_008611	MUL_2797	68	3124373	G	A	NON	T	M	-1	quinone reductase, Qor_1	cytoplasmic protein catalyzes the one electron reduction of certain quinones [catalytic activity: NADPH + quinone = NADP+ + semiquinone]	A
NC_008611	MUL_2797	31	3124410	A	G	SYN	L	L	-1	quinone reductase, Qor_1	cytoplasmic protein catalyzes the one electron reduction of certain quinones [catalytic activity: NADPH + quinone = NADP+ + semiquinone]	G
NC_008611	MUL_2812	696	3139905	G	A	SYN	Y	Y	-1	acetate kinase AckA	cytoplasmic protein involved at the first step (of two) in the conversion of acetate to acetyl-CoA [catalytic activity: ATP + acetate = ADP + acetyl phosphate]	A
NC_008611	MUL_2812	542	3140059	T	C	NON	D	G	-1	acetate kinase AckA	cytoplasmic protein involved at the first step (of two) in the conversion of acetate to acetyl-CoA [catalytic activity: ATP + acetate = ADP + acetyl phosphate]	C
NC_008611	MUL_2812	519	3140082	G	C	NON	D	E	-1	acetate kinase AckA	cytoplasmic protein involved at the first step (of two) in the conversion of acetate to acetyl-CoA [catalytic activity: ATP + acetate = ADP + acetyl phosphate]	C
NC_008611	MUL_2832	7	3160380	G	C	NON	G	R	1	lipase LipU_1	Part of a 2158bp section not present in M. marinum M strain. However LipU orthologs are found in MTB and M. avium paratb membrane protein function unknown but probably involved in lipid hydrolysis	C
NC_008611	MUL_2832	49	3160422	G	C	NON	A	P	1	lipase LipU_1	Part of a 2158bp section not present in M. marinum M strain. However LipU orthologs are found in MTB and M. avium paratb membrane protein function unknown but probably involved in lipid hydrolysis
NC_008611	MUL_2832	297	3160670	C	G	NON	S	R	1	lipase LipU_1	Part of a 2158bp section not present in M. marinum M strain. However LipU orthologs are found in MTB and M. avium paratb membrane protein function unknown but probably involved in lipid hydrolysis	G
NC_008611	MUL_2836	75	3164241	T	C	SYN	V	V	1	hypothetical protein	membrane protein	C
NC_008611	MUL_2836	97	3164263	A	G	NON	T	A	1	hypothetical protein	membrane protein	G
NC_008611	MUL_2846	297	3174777	T	C	SYN	L	L	-1	hypothetical protein	cytoplasmic protein
NC_008611	MUL_2851	346	3179670	C	A	NON	V	L	-1	methyltransferase	cytoplasmic protein function unknown but may be involved in RNA methylation	A
NC_008611	MUL_2865	1188	3190286	C	T	SYN	Q	Q	-1	MCE-family protein Mce3F	membrane protein function unknown, but thought involved in host cell invasion.	T
NC_008611	MUL_2865	1167	3190307	G	C	NON	N	K	-1	MCE-family protein Mce3F	membrane protein function unknown, but thought involved in host cell invasion.	C
NC_008611	MUL_2865	135	3191339	G	T	SYN	T	T	-1	MCE-family protein Mce3F	membrane protein function unknown, but thought involved in host cell invasion.	T
NC_008611	MUL_2865	122	3191352	C	G	NON	R	A	-1	MCE-family protein Mce3F	membrane protein function unknown, but thought involved in host cell invasion.	G
NC_008611	MUL_2865	121	3191353	G	C	NON	R	A	-1	MCE-family protein Mce3F	membrane protein function unknown, but thought involved in host cell invasion.
NC_008611	MUL_2869	526	3195706	C	A	NON	G	*	-1	MCE-family protein Mce3B	membrane protein function unknown, but thought to be involved in host cell invasion.	A
NC_008611	MUL_2869	68	3196164	G	A	NON	A	V	-1	MCE-family protein Mce3B	membrane protein function unknown, but thought to be involved in host cell invasion.	A
NC_008611	MUL_2871	342	3198048	T	A	SYN	G	G	-1	conserved hypothetical integral membrane protein, Yrb3B	membrane protein function unknown, but probably part of Mce3 operon and member of YrbE family
NC_008611	MUL_2876	766	3202446	G	T	NON	A	S	1	conserved hypothetical regulatory protein	cytoplasmic protein function unknown but weak domain identity with two- component response regulators	T
NC_008611	MUL_2895	750	3220622	C	T	SYN	E	E	-1	conserved hypothetical oxidoreductase	cytoplasmic protein function unknown but domain identity with Fe-S oxidoreductases	T
NC_008611	MUL_2895	163	3221209	G	T	SYN	R	R	-1	conserved hypothetical oxidoreductase	cytoplasmic protein function unknown but domain identity with Fe-S oxidoreductases	T
NC_008611	MUL_2914	766	3239590	C	T	NON	V	I	-1	metal-dependent hydrolase	cytoplasmic protein	T
NC_008611	MUL_2914	184	3240172	C	T	NON	A	T	-1	metal-dependent hydrolase	cytoplasmic protein	T
NC_008611	MUL_2920	1350	3245611	G	A	SYN	T	T	-1	acyl-CoA ligase FadD31	cytoplasmic protein function unknown, but involvement in lipid metabolism.	A
NC_008611	MUL_2920	1045	3245916	C	T	NON	A	T	-1	acyl-CoA ligase FadD31	cytoplasmic protein function unknown, but involvement in lipid metabolism.	T
NC_008611	MUL_2920	1019	3245942	A	G	NON	V	A	-1	acyl-CoA ligase FadD31	cytoplasmic protein function unknown, but involvement in lipid metabolism.	G
NC_008611	MUL_2920	777	3246184	A	G	SYN	Y	Y	-1	acyl-CoA ligase FadD31	cytoplasmic protein function unknown, but involvement in lipid metabolism.	G
NC_008611	MUL_2920	30	3246931	C	T	SYN	A	A	-1	acyl-CoA ligase FadD31	cytoplasmic protein function unknown, but involvement in lipid metabolism.	T
NC_008611	MUL_2926	883	3250046	T	C	NON	T	A	-1	D-amino acid oxidase Aao	cytoplasmic protein wide specificity for D-amino acids. also acts on glycine [catalytic activity: a D-amino acid + H2O + O2 = a 2-oxo acid + NH3 + H2O2]	C
NC_008611	MUL_2926	800	3250129	A	G	NON	L	S	-1	D-amino acid oxidase Aao	cytoplasmic protein wide specificity for D-amino acids. also acts on glycine [catalytic activity: a D-amino acid + H2O + O2 = a 2-oxo acid + NH3 + H2O2]	G
NC_008611	MUL_2926	605	3250324	T	C	NON	H	R	-1	D-amino acid oxidase Aao	cytoplasmic protein wide specificity for D-amino acids. also acts on glycine [catalytic activity: a D-amino acid + H2O + O2 = a 2-oxo acid + NH3 + H2O2]	C
NC_008611	MUL_2926	61	3250868	T	C	NON	I	V	-1	D-amino acid oxidase Aao	cytoplasmic protein wide specificity for D-amino acids. also acts on glycine [catalytic activity: a D-amino acid + H2O + O2 = a 2-oxo acid + NH3 + H2O2]	C
NC_008611	MUL_2932	1028	3254948	G	C	NON	P	R	-1	PPE family protein	membrane protein
NC_008611	MUL_2932	503	3255473	C	G	NON	R	P	-1	PPE family protein	membrane protein
NC_008611	MUL_2932	72	3255904	A	G	SYN	P	P	-1	PPE family protein	membrane protein	G
NC_008611	MUL_2934	175	3257198	G	A	NON	V	M	1	dehydrogenase	cytoplasmic protein function unknown, probably involved in cellular metabolism.	A
NC_008611	MUL_2934	541	3257564	G	C	NON	D	H	1	dehydrogenase	cytoplasmic protein function unknown, probably involved in cellular metabolism.	C
NC_008611	MUL_2934	573	3257596	C	G	NON	I	M	1	dehydrogenase	cytoplasmic protein function unknown, probably involved in cellular metabolism.	G
NC_008611	MUL_2935	218	3259442	G	A	NON	A	V	-1	oxidoreductase FadB5	cytoplasmic protein thought to be involved in fatty acid degradation. FadB and FadA are the alpha and BetA subunits of the multifunctional enzyme complex of the fatty acid degradation cycle.
NC_008611	MUL_2935	202	3259458	C	T	NON	G	R	-1	oxidoreductase FadB5	cytoplasmic protein thought to be involved in fatty acid degradation. FadB and FadA are the alpha and BetA subunits of the multifunctional enzyme complex of the fatty acid degradation cycle.	T
NC_008611	MUL_2938	158	3261074	T	A	NON	E	V	-1	hypothetical protein	cytoplasmic protein	A
NC_008611	MUL_2943	28	3264321	A	G	NON	I	V	1	isocitrate lyase AceAb	cytoplasmic protein involved in glyoxylate bypass, an alternative to the tricarboxylic acid cycle [catalytic activity: isocitrate = succinate + glyoxylate]	G
NC_008611	MUL_2943	185	3264478	T	C	NON	V	A	1	isocitrate lyase AceAb	cytoplasmic protein involved in glyoxylate bypass, an alternative to the tricarboxylic acid cycle [catalytic activity: isocitrate = succinate + glyoxylate]	C
NC_008611	MUL_2943	646	3264939	G	A	NON	G	S	1	isocitrate lyase AceAb	cytoplasmic protein involved in glyoxylate bypass, an alternative to the tricarboxylic acid cycle [catalytic activity: isocitrate = succinate + glyoxylate]	A
NC_008611	MUL_2943	1028	3265321	C	T	NON	T	I	1	isocitrate lyase AceAb	cytoplasmic protein involved in glyoxylate bypass, an alternative to the tricarboxylic acid cycle [catalytic activity: isocitrate = succinate + glyoxylate]	T
NC_008611	MUL_2943	1180	3265473	A	G	NON	T	A	1	isocitrate lyase AceAb	cytoplasmic protein involved in glyoxylate bypass, an alternative to the tricarboxylic acid cycle [catalytic activity: isocitrate = succinate + glyoxylate]	G
NC_008611	MUL_2943	1503	3265796	A	G	SYN	K	K	1	isocitrate lyase AceAb	cytoplasmic protein involved in glyoxylate bypass, an alternative to the tricarboxylic acid cycle [catalytic activity: isocitrate = succinate + glyoxylate]	G
NC_008611	MUL_2948	137	3270654	G	C	NON	R	P	1	hypothetical protein	Detected in the membrane fraction by proteomics (LC- MS/MS) membrane protein	C
NC_008611	MUL_2949	1019	3271189	A	G	NON	V	A	-1	monooxygenase	Detected in the membrane fraction by proteomics (LC- MS/MS) cytoplasmic protein
NC_008611	MUL_2951	20	3273376	C	T	NON	P	L	1	lipase LipD	membrane protein function unknown, lipolytic enzyme probably involved in cellular metabolism	T
NC_008611	MUL_2951	149	3273505	C	T	NON	T	I	1	lipase LipD	membrane protein function unknown, lipolytic enzyme probably involved in cellular metabolism	T
NC_008611	MUL_2951	330	3273686	G	A	NON	W	*	1	lipase LipD	membrane protein function unknown, lipolytic enzyme probably involved in cellular metabolism	A
NC_008611	MUL_2952	638	3274773	G	A	NON	A	V	-1	hypothetical protein	Detected in the membrane fraction by proteomics (2D- LC-MS/MS) membrane protein	A
NC_008611	MUL_2965	167	3288183	A	G	NON	D	G	1	NADP-dependent alcohol dehydrogenase AdhC	cytoplasmic protein generates aldehyde or ketone from alcohol [catalytic activity: alcohol + NADP(+) = aldehyde or ketone + NADPH]	G
NC_008611	MUL_2965	657	3288673	A	G	SYN	T	T	1	NADP-dependent alcohol dehydrogenase AdhC	cytoplasmic protein generates aldehyde or ketone from alcohol [catalytic activity: alcohol + NADP(+) = aldehyde or ketone + NADPH]	G
NC_008611	MUL_2966	27	3289086	C	T	SYN	D	D	1	hypothetical protein	cytoplasmic protein function unknown but some similarity with YceI-like family proteins. in E. coli YceI is a base-induced periplasmic protein. its function has not yet been characterised.	T
NC_008611	MUL_2966	480	3289539	G	A	SYN	L	L	1	hypothetical protein	cytoplasmic protein function unknown but some similarity with YceI-like family proteins. in E. coli YceI is a base-induced periplasmic protein. its function has not yet been characterised.	A
NC_008611	MUL_2966	495	3289554	C	G	SYN	L	L	1	hypothetical protein	cytoplasmic protein function unknown but some similarity with YceI-like family proteins. in E. coli YceI is a base-induced periplasmic protein. its function has not yet been characterised.	G
NC_008611	MUL_2968	564	3291071	C	G	SYN	S	S	-1	hypothetical protein	cytoplasmic protein	G
NC_008611	MUL_2968	440	3291195	T	C	NON	Q	R	-1	hypothetical protein	cytoplasmic protein	C
NC_008611	MUL_2970	605	3294314	T	C	NON	F	S	1	secreted antigen 85-B FbpB	Detected in the membrane fraction by proteomics (LC- MS/MS) Also detected in the cytoplasm by proteomics. membrane protein involved in cell wall mycoloylation. proteins of the antigen 85 complex are responsible for the high affinity of mycobacteria to fibronectin. possesses a mycolyltransferase activity required for the biogenesis of trehalose dimycolate (cord factor), a dominant structure necess…	C
NC_008611	MUL_2972	193	3295739	T	G	NON	L	V	1	oxidoreductase	cytoplasmic protein function unknown, probably involved in cellular metabolism.
NC_008611	MUL_2973	113	3296674	A	T	NON	D	V	1	oxidoreductase	cytoplasmic protein function unknown, probably involved in cellular metabolism.
NC_008611	MUL_2973	117	3296678	T	G	NON	D	E	1	oxidoreductase	cytoplasmic protein function unknown, probably involved in cellular metabolism.
NC_008611	MUL_2973	783	3297344	G	A	SYN	K	K	1	oxidoreductase	cytoplasmic protein function unknown, probably involved in cellular metabolism.	A
NC_008611	MUL_2977	25	3299126	G	A	NON	A	T	1	short-chain type dehydrogenase/reductase	cytoplasmic protein function unknown, probably involved in cellular metabolism
NC_008611	MUL_2977	286	3299387	G	A	NON	D	N	1	short-chain type dehydrogenase/reductase	cytoplasmic protein function unknown, probably involved in cellular metabolism	A
NC_008611	MUL_3001	1211	3322718	A	G	NON	H	R	1	trehalose synthase TreS_1	Detected in the membrane fraction by proteomics (LC- MS/MS) membrane protein involved in trehalose biosynthesis (protective effect) converts maltose to trehalose. mycobacteria can produce trehalose from glucose 6-phosphate and UDP-glucose (the OtsA-OtsB pathway) from glycogen-like alpha(1-->4)- linked glucose polymers (the TreY-TreZ pathway) and from maltose (the TreS pathway)	G
NC_008611	MUL_3002	474	3323449	C	T	SYN	F	F	1	L-lactate dehydrogenase (cytochrome) LldD2	Detected in the membrane fraction by proteomics (2D- LC-MS/MS) membrane protein involved in respiration; catalyzes conversion of lactate into pyruvate [catalytic activity: (S)-lactate + 2 ferricytochrome C = pyruvate + 2 ferrocytochrome C]	T
NC_008611	MUL_3003	1188	3325511	C	T	SYN	G	G	1	Lon, ATP-dependent Lon protease	cytoplasmic protein function unknown but probably plays a role in posttranslational protein modification, turnover and chaperone functions.	T
NC_008611	MUL_3003	1201	3325524	C	A	SYN	R	R	1	Lon, ATP-dependent Lon protease	cytoplasmic protein function unknown but probably plays a role in posttranslational protein modification, turnover and chaperone functions.	A
NC_008611	MUL_3003	1727	3326050	G	A	NON	R	H	1	Lon, ATP-dependent Lon protease	cytoplasmic protein function unknown but probably plays a role in posttranslational protein modification, turnover and chaperone functions.	A
NC_008611	MUL_3003	2207	3326530	C	A	NON	A	D	1	Lon, ATP-dependent Lon protease	cytoplasmic protein function unknown but probably plays a role in posttranslational protein modification, turnover and chaperone functions.	A
NC_008611	MUL_3008	1228	3330645	C	G	NON	V	L	-1	hypothetical protein	cytoplasmic protein function unknown but contains domain identity with acetyl-CoA acetyltransferase domain, thus possible involvement in lipid metabolism	G
NC_008611	MUL_3008	919	3330954	C	T	NON	G	S	-1	hypothetical protein	cytoplasmic protein function unknown but contains domain identity with acetyl-CoA acetyltransferase domain, thus possible involvement in lipid metabolism	T
NC_008611	MUL_3008	387	3331486	G	A	SYN	G	G	-1	hypothetical protein	cytoplasmic protein function unknown but contains domain identity with acetyl-CoA acetyltransferase domain, thus possible involvement in lipid metabolism	A
NC_008611	MUL_3008	213	3331660	A	G	NON	L	F	-1	hypothetical protein	cytoplasmic protein function unknown but contains domain identity with acetyl-CoA acetyltransferase domain, thus possible involvement in lipid metabolism	G
NC_008611	MUL_3011	137	3335294	G	A	NON	G	D	1	short-chain type dehydrogenase	cytoplasmic protein function unknown, probably involved in cellular metabolism	A
NC_008611	MUL_3011	156	3335313	G	A	SYN	E	E	1	short-chain type dehydrogenase	cytoplasmic protein function unknown, probably involved in cellular metabolism	A
NC_008611	MUL_3012	715	3336775	T	A	NON	Y	N	1	D-xylulose 5-phosphate Xfp	Detected in the membrane and secreted fractions by proteomics (2D-LC-MS/MS) membrane protein bacterial enzyme that splits fructose-6-P and/or xylulose-5-P with the aid of inorganic phosphate into either acetyl-P and erythrose-4-p and/or acetyl-P and glyeraldehyde-3-p	A
NC_008611	MUL_3015	958	3340333	T	C	NON	R	G	-1	alcohol dehydrogenase AdhA	cytoplasmic protein catalyzes the reversible oxidation of ethanol to acetaldehyde with the concomitant reduction of NAD	C
NC_008611	MUL_3016	241	3341403	A	G	SYN	L	L	-1	hypothetical protein	membrane protein	G
NC_008611	MUL_3017	501	3342228	A	G	SYN	F	F	-1	alanine and proline rich secreted protein Apa	Two isoform were also detected by proteomics in the cytoplasm. membrane protein function unknown could mediate bacterial attachment to host cells.	G
NC_008611	MUL_3017	294	3342435	A	G	SYN	G	G	-1	alanine and proline rich secreted protein Apa	Two isoform were also detected by proteomics in the cytoplasm. membrane protein function unknown could mediate bacterial attachment to host cells.
NC_008611	MUL_3017	278	3342451	G	A	NON	S	F	-1	alanine and proline rich secreted protein Apa	Two isoform were also detected by proteomics in the cytoplasm. membrane protein function unknown could mediate bacterial attachment to host cells.	A
NC_008611	MUL_3021	320	3347296	A	G	NON	L	P	-1	molybdenum-transport integral membrane protein ABC transporter ModB	membrane protein part of the binding-protein-dependent transport system ModABC for molybdenum; responsible for the translocation of the substrate across the membrane.	G
NC_008611	MUL_3021	305	3347311	C	G	NON	G	A	-1	molybdenum-transport integral membrane protein ABC transporter ModB	membrane protein part of the binding-protein-dependent transport system ModABC for molybdenum; responsible for the translocation of the substrate across the membrane.	G
NC_008611	MUL_3021	65	3347551	A	G	NON	V	A	-1	molybdenum-transport integral membrane protein ABC transporter ModB	membrane protein part of the binding-protein-dependent transport system ModABC for molybdenum; responsible for the translocation of the substrate across the membrane.	G
NC_008611	MUL_3024	103	3349505	G	A	NON	A	T	1	oxidoreductase	cytoplasmic protein function unknown, probably involved in cellular metabolism
NC_008611	MUL_3039	1003	3364465	G	A	NON	G	S	1	acetolactate synthase IlvG	cytoplasmic protein valine and isoleucine biosynthesis (first step) [catalytic activity : 2-acetolactate + CO(2) = 2 pyruvate]	A
NC_008611	MUL_3039	1268	3364730	G	A	NON	C	Y	1	acetolactate synthase IlvG	cytoplasmic protein valine and isoleucine biosynthesis (first step) [catalytic activity : 2-acetolactate + CO(2) = 2 pyruvate]
NC_008611	MUL_3040	593	3365738	G	A	NON	G	E	1	preprotein translocase ATPase SecA2	Detected in the membrane fraction by proteomics. membrane protein involved in protein export. may interacts with the SecY/SecE subunits. SecA has a central role in coupling the hydrolysis of ATP to the transfer of pre-secretory periplasmic and outer membrane proteins across the membrane.	A
NC_008611	MUL_3040	2065	3367210	C	G	NON	H	D	1	preprotein translocase ATPase SecA2	Detected in the membrane fraction by proteomics. membrane protein involved in protein export. may interacts with the SecY/SecE subunits. SecA has a central role in coupling the hydrolysis of ATP to the transfer of pre-secretory periplasmic and outer membrane proteins across the membrane.	G
NC_008611	MUL_3055	1800	3383198	C	T	SYN	E	E	-1	malate synthase G GlcB	Detected in the cytoplasmic and in the extracellular matrix fractions by proteomics. cytoplasmic protein involved in glyoxylate bypass (second step), an alternative to the tricarboxylic acid cycle [catalytic activity : L-malate + CoA = acetyl-CoA + H(2)O + glyoxylate]	T
NC_008611	MUL_3055	786	3384212	C	A	SYN	L	L	-1	malate synthase G GlcB	Detected in the cytoplasmic and in the extracellular matrix fractions by proteomics. cytoplasmic protein involved in glyoxylate bypass (second step), an alternative to the tricarboxylic acid cycle [catalytic activity : L-malate + CoA = acetyl-CoA + H(2)O + glyoxylate]	A
NC_008611	MUL_3059	920	3390037	G	C	NON	R	P	1	drug-transport transmembrane ATP-binding protein ABC transporter	Detected in the membrane fraction by proteomics (LC- MS/MS) membrane protein thought to be involved in active transport of drugs across the membrane (export): multidrugs resistance by an export mechanism. responsible for energy coupling to the transport system and for the translocation of the substrate across the membrane.	C
NC_008611	MUL_3059	1458	3390575	C	T	SYN	R	R	1	drug-transport transmembrane ATP-binding protein ABC transporter	Detected in the membrane fraction by proteomics (LC- MS/MS) membrane protein thought to be involved in active transport of drugs across the membrane (export): multidrugs resistance by an export mechanism. responsible for energy coupling to the transport system and for the translocation of the substrate across the membrane.	T
NC_008611	MUL_3059	1609	3390726	T	C	SYN	L	L	1	drug-transport transmembrane ATP-binding protein ABC transporter	Detected in the membrane fraction by proteomics (LC- MS/MS) membrane protein thought to be involved in active transport of drugs across the membrane (export): multidrugs resistance by an export mechanism. responsible for energy coupling to the transport system and for the translocation of the substrate across the membrane.
NC_008611	MUL_3062	1281	3395667	G	C	SYN	G	G	1	PE-PGRS family protein	PE_PGRS9_1; membrane protein
NC_008611	MUL_3062	1369	3395755	A	G	NON	S	G	1	PE-PGRS family protein	PE_PGRS9_1; membrane protein
NC_008611	MUL_3062	2082	3396468	G	C	SYN	G	G	1	PE-PGRS family protein	PE_PGRS9_1; membrane protein
NC_008611	MUL_3063	1802	3397220	A	G	NON	L	P	-1	conserved hypothetical flavoprotein	translation fusion of two CDS caused by frameshift at 3' end of hypothetical protein MON6433 (3398526) membrane protein function unknown, probably involved in cellular metabolism	G
NC_008611	MUL_3063	372	3398650	T	G	SYN	G	G	-1	conserved hypothetical flavoprotein	translation fusion of two CDS caused by frameshift at 3' end of hypothetical protein MON6433 (3398526) membrane protein function unknown, probably involved in cellular metabolism	G
NC_008611	MUL_3066	561	3401769	G	C	NON	Y	*	-1	membrane-bound C-5 sterol desaturase Erg3	membrane protein involved in lipid desaturation	C
NC_008611	MUL_3074	406	3410510	T	C	NON	T	A	-1	PPE family protein	PPE31; membrane protein	C
NC_008611	MUL_3104	273	3452522	A	G	SYN	V	V	-1	glycosyl transferase	cytoplasmic protein	G
NC_008611	MUL_3104	250	3452545	G	A	NON	L	F	-1	glycosyl transferase	cytoplasmic protein	A
NC_008611	MUL_3104	230	3452565	A	G	NON	V	A	-1	glycosyl transferase	cytoplasmic protein	G
NC_008611	MUL_3106	1122	3453870	C	T	NON	W	*	-1	cytochrome P450 143A3 Cyp143A3	cytoplasmic protein cytochromes P450 are a group of heme-thiolate monooxygenases. they oxidize a variety of structurally unrelated compounds, including steroids, fatty acids, and xenobiotics.	T
NC_008611	MUL_3106	778	3454214	G	T	NON	Q	K	-1	cytochrome P450 143A3 Cyp143A3	cytoplasmic protein cytochromes P450 are a group of heme-thiolate monooxygenases. they oxidize a variety of structurally unrelated compounds, including steroids, fatty acids, and xenobiotics.	T
NC_008611	MUL_3106	381	3454611	G	C	NON	C	W	-1	cytochrome P450 143A3 Cyp143A3	cytoplasmic protein cytochromes P450 are a group of heme-thiolate monooxygenases. they oxidize a variety of structurally unrelated compounds, including steroids, fatty acids, and xenobiotics.	C
NC_008611	MUL_3106	221	3454771	G	C	NON	P	R	-1	cytochrome P450 143A3 Cyp143A3	cytoplasmic protein cytochromes P450 are a group of heme-thiolate monooxygenases. they oxidize a variety of structurally unrelated compounds, including steroids, fatty acids, and xenobiotics.	C
NC_008611	MUL_3107	362	3455412	T	G	NON	E	A	-1	hypothetical protein	Detected in the membrane fraction by proteomics (LC- MS/MS) membrane protein function unknown - contains signal peptide	G
NC_008611	MUL_3107	148	3455626	C	G	NON	A	P	-1	hypothetical protein	Detected in the membrane fraction by proteomics (LC- MS/MS) membrane protein function unknown - contains signal peptide
NC_008611	MUL_3107	18	3455756	C	G	SYN	T	T	-1	hypothetical protein	Detected in the membrane fraction by proteomics (LC- MS/MS) membrane protein function unknown - contains signal peptide
NC_008611	MUL_3108	264	3456266	C	A	NON	D	E	1	short-chain type dehydrogenase/reductase	cytoplasmic protein	A
NC_008611	MUL_3108	335	3456337	C	T	NON	S	F	1	short-chain type dehydrogenase/reductase	cytoplasmic protein	T
NC_008611	MUL_3108	770	3456772	C	T	NON	S	F	1	short-chain type dehydrogenase/reductase	cytoplasmic protein	T
NC_008611	MUL_3115	145	3462471	C	T	SYN	L	L	1	methyltransferase	cytoplasmic protein could cause methylation of unknown substrate.	T
NC_008611	MUL_3125	314	3470855	G	A	NON	R	Q	1	hypothetical protein	cytoplasmic protein	A
NC_008611	MUL_3125	492	3471033	A	G	SYN	A	A	1	hypothetical protein	cytoplasmic protein	G
NC_008611	MUL_3125	505	3471046	T	C	NON	S	P	1	hypothetical protein	cytoplasmic protein	C
NC_008611	MUL_3147	21	3496070	G	A	SYN	P	P	1	hypothetical protein	membrane protein function unknown but some domain identity with Zn- dependent proteases	A
NC_008611	MUL_3147	481	3496530	C	G	NON	R	G	1	hypothetical protein	membrane protein function unknown but some domain identity with Zn- dependent proteases	G
NC_008611	MUL_3147	572	3496621	A	C	NON	Q	P	1	hypothetical protein	membrane protein function unknown but some domain identity with Zn- dependent proteases	C
NC_008611	MUL_3147	875	3496924	T	C	NON	L	P	1	hypothetical protein	membrane protein function unknown but some domain identity with Zn- dependent proteases
NC_008611	MUL_3147	890	3496939	T	C	NON	L	P	1	hypothetical protein	membrane protein function unknown but some domain identity with Zn- dependent proteases
NC_008611	MUL_3155	808	3508523	A	C	NON	S	A	-1	hypothetical protein	membrane protein involved in transport of unknown substrate across the membrane.	C
NC_008611	MUL_3155	798	3508533	C	T	NON	M	I	-1	hypothetical protein	membrane protein involved in transport of unknown substrate across the membrane.	T
NC_008611	MUL_3162	13	3514381	C	G	NON	L	V	1	hypothetical protein	cytoplasmic protein	G
NC_008611	MUL_3162	123	3514491	T	C	SYN	Y	Y	1	hypothetical protein	cytoplasmic protein	C
NC_008611	MUL_3162	142	3514510	G	C	NON	G	R	1	hypothetical protein	cytoplasmic protein	C
NC_008611	MUL_3162	534	3514902	T	C	SYN	D	D	1	hypothetical protein	cytoplasmic protein
NC_008611	MUL_3162	540	3514908	G	C	SYN	S	S	1	hypothetical protein	cytoplasmic protein
NC_008611	MUL_3167	1239	3519802	A	G	SYN	C	C	-1	divalent cation-transport integral membrane protein	membrane protein H(+)-stimulated, highly selective, divalent cation uptake system. responsible for the translocation of the divalent metal across the membrane.	G
NC_008611	MUL_3167	1084	3519957	T	C	NON	S	G	-1	divalent cation-transport integral membrane protein	membrane protein H(+)-stimulated, highly selective, divalent cation uptake system. responsible for the translocation of the divalent metal across the membrane.	C
NC_008611	MUL_3167	1074	3519967	G	C	SYN	L	L	-1	divalent cation-transport integral membrane protein	membrane protein H(+)-stimulated, highly selective, divalent cation uptake system. responsible for the translocation of the divalent metal across the membrane.
NC_008611	MUL_3167	895	3520146	G	A	SYN	L	L	-1	divalent cation-transport integral membrane protein	membrane protein H(+)-stimulated, highly selective, divalent cation uptake system. responsible for the translocation of the divalent metal across the membrane.	A
NC_008611	MUL_3167	558	3520483	G	C	SYN	P	P	-1	divalent cation-transport integral membrane protein	membrane protein H(+)-stimulated, highly selective, divalent cation uptake system. responsible for the translocation of the divalent metal across the membrane.	C
NC_008611	MUL_3169	4500	3522102	G	C	NON	H	Q	-1	PPE family protein	PPE8; membrane protein
NC_008611	MUL_3169	4485	3522117	G	C	NON	F	L	-1	PPE family protein	PPE8; membrane protein	C
NC_008611	MUL_3169	3850	3522752	C	T	NON	A	T	-1	PPE family protein	PPE8; membrane protein
NC_008611	MUL_3169	798	3525804	A	G	NON	V	F	-1	PPE family protein	PPE8; membrane protein
NC_008611	MUL_3169	796	3525806	C	A	NON	V	F	-1	PPE family protein	PPE8; membrane protein
NC_008611	MUL_3170	343	3527572	G	T	NON	A	S	1	hypothetical protein	cytoplasmic protein	T
NC_008611	MUL_3178	1001	3538500	A	G	NON	F	S	-1	hypothetical protein	membrane protein	G
NC_008611	MUL_3181	513	3543226	A	G	SYN	T	T	-1	hypothetical protein	cytoplasmic protein	G
NC_008611	MUL_3182	884	3544207	A	G	NON	V	A	-1	amino acid transporter PotE	membrane protein thought to be involved in transport amino acids across the membrane.	G
NC_008611	MUL_3186	1132	3552138	T	C	NON	S	G	-1	PE-PGRS family protein	membrane protein function unknown. seems to influence both cell surface interactions among mycobacteria and the interactions of bacteria with macrophages.	C
NC_008611	MUL_3186	185	3553085	C	T	NON	C	Y	-1	PE-PGRS family protein	membrane protein function unknown. seems to influence both cell surface interactions among mycobacteria and the interactions of bacteria with macrophages.	T
NC_008611	MUL_3187	294	3554528	G	C	NON	F	L	-1	sugar transporter	Detected in the membrane fraction by proteomics (LC- MS/MS) membrane protein involved in active transport of unknown sugars across the membrane. responsible for the translocation of the substrate across the membrane.	C
NC_008611	MUL_3189	283	3556618	A	G	NON	T	A	1	conserved secreted protein	Detected in the membrane fraction by proteomics (LC- MS/MS) secreted protein function unknown but contains signal peptide and domain identity with periplasmic component of the tol biopolymer transport system.	G
NC_008611	MUL_3189	420	3556755	C	T	SYN	R	R	1	conserved secreted protein	Detected in the membrane fraction by proteomics (LC- MS/MS) secreted protein function unknown but contains signal peptide and domain identity with periplasmic component of the tol biopolymer transport system.	T
NC_008611	MUL_3189	600	3556935	T	C	SYN	N	N	1	conserved secreted protein	Detected in the membrane fraction by proteomics (LC- MS/MS) secreted protein function unknown but contains signal peptide and domain identity with periplasmic component of the tol biopolymer transport system.	C
NC_008611	MUL_3195	155	3564517	C	T	NON	P	L	1	conserved hypothetical hydrolase	cytoplasmic protein function unknown, probably involved in cellular metabolism.	T
NC_008611	MUL_3195	1001	3565363	A	C	NON	Q	P	1	conserved hypothetical hydrolase	cytoplasmic protein function unknown, probably involved in cellular metabolism.	C
NC_008611	MUL_3196	335	3566397	G	A	NON	T	I	-1	hypothetical protein	cytoplasmic protein	A
NC_008611	MUL_3196	29	3566703	G	A	NON	A	V	-1	hypothetical protein	cytoplasmic protein	A
NC_008611	MUL_3197	70	3567705	G	A	NON	R	*	-1	polyprenyl synthetase IdsB	cytoplasmic protein involved in biosynthesis of membrane ether-linked lipids. catalyzes the trans-addition of the three molecules of Ipp onto DMAPP to form geranylgeranyl pyrophosphate which is a precursor of the ether-linked lipids. catalyzes the consecutive condensation of	A
NC_008611	MUL_3204	672	3573248	G	C	SYN	T	T	-1	aldose 1-epimerase	Detected in the membrane fraction by proteomics cytoplasmic protein function unknown role in carbohydrate transport and metabolism	C
NC_008611	MUL_3204	654	3573266	G	A	SYN	G	G	-1	aldose 1-epimerase	Detected in the membrane fraction by proteomics cytoplasmic protein function unknown role in carbohydrate transport and metabolism	A
NC_008611	MUL_5114	164	3574367	T	G	NON	L	*	1	hypothetical protein	cytoplasmic protein	G
NC_008611	MUL_3214	394	3585388	A	G	SYN	L	L	-1	DNAse (TatD family)	cytoplasmic protein TatD related DNAse. this family of proteins are related to a large superfamily of metalloenzymes. TatD, a member of this family has been shown experimentally to be a DNAse enzyme.	G
NC_008611	MUL_3214	375	3585407	C	T	SYN	E	E	-1	DNAse (TatD family)	cytoplasmic protein TatD related DNAse. this family of proteins are related to a large superfamily of metalloenzymes. TatD, a member of this family has been shown experimentally to be a DNAse enzyme.	T
NC_008611	MUL_3215	441	3586603	T	G	NON	L	F	-1	hypothetical protein	cytoplasmic protein function unknown, contains PP-loop ATPase domain	G
NC_008611	MUL_3215	421	3586623	T	C	NON	S	G	-1	hypothetical protein	cytoplasmic protein function unknown, contains PP-loop ATPase domain	C
NC_008611	MUL_3216	549	3587364	T	G	SYN	R	R	-1	hypothetical protein	cytoplasmic protein	G
NC_008611	MUL_3217	1511	3588027	G	C	NON	A	G	-1	P-loop ATPase	Detected in the secreted protein fraction by proteomics. membrane protein
NC_008611	MUL_3217	1494	3588044	G	A	SYN	G	G	-1	P-loop ATPase	Detected in the secreted protein fraction by proteomics. membrane protein	A
NC_008611	MUL_3218	358	3589995	C	G	NON	D	H	-1	zinc metalloprotease	cytoplasmic protein	G
NC_008611	MUL_3230	1503	3606848	C	T	SYN	S	S	1	prophage integrase	cytoplasmic protein Integration/excision of an unknown mycbacteriophage	T
NC_008611	MUL_3264	344	3639828	G	T	NON	A	D	-1	ferredoxin FdxA_1	cytoplasmic protein involved in electron transfer.	T
NC_008611	MUL_3265	953	3641291	C	T	NON	A	V	1	integral membrane nitrite extrusion protein NarK3	membrane protein involved in excretion of nitrite produced by the dissimilatory reduction of nitrate. responsible for the translocation of the substrate across the membrane.	T
NC_008611	MUL_3265	971	3641309	A	G	NON	N	S	1	integral membrane nitrite extrusion protein NarK3	membrane protein involved in excretion of nitrite produced by the dissimilatory reduction of nitrate. responsible for the translocation of the substrate across the membrane.	G
NC_008611	MUL_3265	1093	3641431	G	A	NON	E	K	1	integral membrane nitrite extrusion protein NarK3	membrane protein involved in excretion of nitrite produced by the dissimilatory reduction of nitrate. responsible for the translocation of the substrate across the membrane.	A
NC_008611	MUL_3271	183	3647886	G	A	SYN	Y	Y	-1	hypothetical protein	membrane protein	A
NC_008611	MUL_3271	172	3647897	G	A	SYN	L	L	-1	hypothetical protein	membrane protein	A
NC_008611	MUL_3275	252	3651772	C	G	SYN	L	L	1	hypothetical protein	cytoplasmic protein	G
NC_008611	MUL_3276	113	3652857	T	C	NON	V	A	1	hypothetical protein	cytoplasmic protein function unknown but contains phosphoribosyltransferase domain	C
NC_008611	MUL_3276	276	3653020	A	G	SYN	Q	Q	1	hypothetical protein	cytoplasmic protein function unknown but contains phosphoribosyltransferase domain	G
NC_008611	MUL_3276	304	3653048	T	C	NON	W	R	1	hypothetical protein	cytoplasmic protein function unknown but contains phosphoribosyltransferase domain	C
NC_008611	MUL_3276	519	3653263	G	C	SYN	A	A	1	hypothetical protein	cytoplasmic protein function unknown but contains phosphoribosyltransferase domain	C
NC_008611	MUL_3276	686	3653430	G	A	NON	G	E	1	hypothetical protein	cytoplasmic protein function unknown but contains phosphoribosyltransferase domain	A
NC_008611	MUL_3276	710	3653454	C	T	NON	A	V	1	hypothetical protein	cytoplasmic protein function unknown but contains phosphoribosyltransferase domain	T
NC_008611	MUL_3279	32	3656621	G	A	NON	A	V	-1	fatty-acid-CoA ligase	cytoplasmic protein function unknown, but involved in lipid degradation.	A
NC_008611	MUL_3280	33	3656916	A	G	SYN	P	P	1	transmembrane protein DedA	membrane protein	G
NC_008611	MUL_3305	294	3677109	A	G	SYN	A	A	1	bifunctional enzyme riboflavin biosynthesis protein RibD	cytoplasmic protein involved in riboflavin biosynthesis (at the second and third steps) converts 2,5-diamino-6-(ribosylamino)- 4(3H)-pyrimidinone 5'-phosphate into 5-amino-6- (ribosylamino)-2,4(1H,3H)-pyrimidinedione 5'-phosphate [catalytic activity 1: 2,5-diamino-6-hydroxy-4-(5- phosphoribosylamino)pyrimidine + H(2)O = 5-amino-6-(5- phosphoribosylamino)uracil + NH(3)] [catalytic activity 2: 5-am…	G
NC_008611	MUL_3305	299	3677114	G	T	NON	R	L	1	bifunctional enzyme riboflavin biosynthesis protein RibD	cytoplasmic protein involved in riboflavin biosynthesis (at the second and third steps) converts 2,5-diamino-6-(ribosylamino)- 4(3H)-pyrimidinone 5'-phosphate into 5-amino-6- (ribosylamino)-2,4(1H,3H)-pyrimidinedione 5'-phosphate [catalytic activity 1: 2,5-diamino-6-hydroxy-4-(5- phosphoribosylamino)pyrimidine + H(2)O = 5-amino-6-(5- phosphoribosylamino)uracil + NH(3)] [catalytic activity 2: 5-am…	T
NC_008611	MUL_3305	673	3677488	C	G	NON	L	V	1	bifunctional enzyme riboflavin biosynthesis protein RibD	cytoplasmic protein involved in riboflavin biosynthesis (at the second and third steps) converts 2,5-diamino-6-(ribosylamino)- 4(3H)-pyrimidinone 5'-phosphate into 5-amino-6- (ribosylamino)-2,4(1H,3H)-pyrimidinedione 5'-phosphate [catalytic activity 1: 2,5-diamino-6-hydroxy-4-(5- phosphoribosylamino)pyrimidine + H(2)O = 5-amino-6-(5- phosphoribosylamino)uracil + NH(3)] [catalytic activity 2: 5-am…
NC_008611	MUL_3318	3	3690747	G	C	NON	M	I	1	PE-PGRS family protein	Detected in the cytoplasmic fraction by 2D-LC- MS/MS. membrane protein	C
NC_008611	MUL_3318	1275	3692019	C	A	SYN	T	T	1	PE-PGRS family protein	Detected in the cytoplasmic fraction by 2D-LC- MS/MS. membrane protein
NC_008611	MUL_3318	1322	3692066	A	G	NON	N	S	1	PE-PGRS family protein	Detected in the cytoplasmic fraction by 2D-LC- MS/MS. membrane protein	G
NC_008611	MUL_3339	859	3710295	G	A	NON	P	S	-1	extragenic suppressor protein SuhB	Detected in the cytoplasmic fraction by 2D-LC- MS/MS. cytoplasmic protein in E. coli, SuhB mutation (SuhB2) enhances the synthesis of sigma(32) and suppresses temperature- sensitive growth of the RpoH15 mutant. may affect some step(S) of protein synthesis by facilitating the function of GroE or other heat shock proteins.	A
NC_008611	MUL_3339	843	3710311	C	T	SYN	R	R	-1	extragenic suppressor protein SuhB	Detected in the cytoplasmic fraction by 2D-LC- MS/MS. cytoplasmic protein in E. coli, SuhB mutation (SuhB2) enhances the synthesis of sigma(32) and suppresses temperature- sensitive growth of the RpoH15 mutant. may affect some step(S) of protein synthesis by facilitating the function of GroE or other heat shock proteins.	T
NC_008611	MUL_3368	980	3738168	C	G	NON	G	A	-1	GTP-binding protein HflX	cytoplasmic protein possibly a GTPase, modulating activity of HflK and HflC proteins.
NC_008611	MUL_3368	690	3738458	G	C	SYN	L	L	-1	GTP-binding protein HflX	cytoplasmic protein possibly a GTPase, modulating activity of HflK and HflC proteins.	C
NC_008611	MUL_3368	327	3738821	T	C	SYN	E	E	-1	GTP-binding protein HflX	cytoplasmic protein possibly a GTPase, modulating activity of HflK and HflC proteins.	C
NC_008611	MUL_3368	257	3738891	A	G	NON	V	A	-1	GTP-binding protein HflX	cytoplasmic protein possibly a GTPase, modulating activity of HflK and HflC proteins.	G
NC_008611	MUL_3386	701	3755411	G	A	NON	T	I	-1	conserved 35 kDa alanine rich protein	Detected in the cytoplasmic fraction by 2D-LC- MS/MS. cytoplasmic protein function unknown but domain identity to COG1842, PspA, phage shock protein a (IM30), suppresses sigma54- dependent transcription	A
NC_008611	MUL_3403	296	3770193	C	T	NON	S	N	-1	hypothetical protein	cytoplasmic protein	T
NC_008611	MUL_3413	900	3782290	G	A	SYN	P	P	1	ATP-dependent DNA ligase LigB	cytoplasmic protein this protein seals during DNA replication, DNA recombination and DNA repair nicks in double-stranded DNA [catalytic activity: ATP + (deoxyribonucleotide)(N) + (deoxyribonucleotide)(M) = AMP + pyrophosphate + (deoxyribonucleotide)(N+M)]
NC_008611	MUL_3413	917	3782307	C	T	NON	S	F	1	ATP-dependent DNA ligase LigB	cytoplasmic protein this protein seals during DNA replication, DNA recombination and DNA repair nicks in double-stranded DNA [catalytic activity: ATP + (deoxyribonucleotide)(N) + (deoxyribonucleotide)(M) = AMP + pyrophosphate + (deoxyribonucleotide)(N+M)]	T
NC_008611	MUL_3413	1297	3782687	A	G	NON	S	G	1	ATP-dependent DNA ligase LigB	cytoplasmic protein this protein seals during DNA replication, DNA recombination and DNA repair nicks in double-stranded DNA [catalytic activity: ATP + (deoxyribonucleotide)(N) + (deoxyribonucleotide)(M) = AMP + pyrophosphate + (deoxyribonucleotide)(N+M)]	G
NC_008611	MUL_3415	136	3783754	T	C	NON	Y	H	1	transcriptional regulatory protein	cytoplasmic protein involved in transcriptional mechanism	C
NC_008611	MUL_3415	150	3783768	G	C	SYN	L	L	1	transcriptional regulatory protein	cytoplasmic protein involved in transcriptional mechanism
NC_008611	MUL_3422	514	3793428	A	C	NON	S	R	1	chaperone protein DnaK1	Detected in the membrane fraction by proteomics (LC- MS/MS) membrane protein acts as a chaperone. involved in induction by stress conditions E.G. heat shock. possibly has an ATPase activity. in M. tuberculosis H37Rv it is regulated positively by SigH and negatively by HspR.	C
NC_008611	MUL_3422	586	3793500	A	G	NON	I	V	1	chaperone protein DnaK1	Detected in the membrane fraction by proteomics (LC- MS/MS) membrane protein acts as a chaperone. involved in induction by stress conditions E.G. heat shock. possibly has an ATPase activity. in M. tuberculosis H37Rv it is regulated positively by SigH and negatively by HspR.	G
NC_008611	MUL_3422	858	3793772	G	A	SYN	A	A	1	chaperone protein DnaK1	Detected in the membrane fraction by proteomics (LC- MS/MS) membrane protein acts as a chaperone. involved in induction by stress conditions E.G. heat shock. possibly has an ATPase activity. in M. tuberculosis H37Rv it is regulated positively by SigH and negatively by HspR.	A
NC_008611	MUL_3422	873	3793787	T	C	SYN	D	D	1	chaperone protein DnaK1	Detected in the membrane fraction by proteomics (LC- MS/MS) membrane protein acts as a chaperone. involved in induction by stress conditions E.G. heat shock. possibly has an ATPase activity. in M. tuberculosis H37Rv it is regulated positively by SigH and negatively by HspR.	C
NC_008611	MUL_3431	601	3802351	G	C	NON	L	V	-1	fatty-acid-CoA ligase	cytoplasmic protein function unknown, but involved in lipid degradation.	C
NC_008611	MUL_3431	329	3802623	A	G	NON	V	A	-1	fatty-acid-CoA ligase	cytoplasmic protein function unknown, but involved in lipid degradation.	G
NC_008611	MUL_3435	151	3808782	C	G	NON	V	L	-1	oxidoreductase GMC-type	Good u/s rbs. function unknown, probably involved in cellular metabolism.	G
NC_008611	MUL_3446	829	3823160	C	G	NON	P	A	1	hypothetical protein	cytoplasmic protein	G
NC_008611	MUL_3464	141	3843614	C	G	SYN	R	R	1	conserved hypothetical regulatory protein	cytoplasmic protein
NC_008611	MUL_3464	150	3843623	A	G	SYN	K	K	1	conserved hypothetical regulatory protein	cytoplasmic protein	G
NC_008611	MUL_3464	387	3843860	G	A	SYN	P	P	1	conserved hypothetical regulatory protein	cytoplasmic protein	A
NC_008611	MUL_3464	437	3843910	A	G	NON	D	G	1	conserved hypothetical regulatory protein	cytoplasmic protein	G
NC_008611	MUL_3464	476	3843949	G	A	NON	G	D	1	conserved hypothetical regulatory protein	cytoplasmic protein	A
NC_008611	MUL_3469	79	3848417	A	G	NON	S	G	1	tRNA delta(2)-isopentenylpyrophosphate transferase MiaA_1	cytoplasmic protein catalyzes the first step in the biosynthesis of 2- methylthio-N6-(delta(2)-isopentenyl)-adenosine adjacent to the anticodon of several tRNA species [catalytic activity: isopentenyl diphosphate + tRNA = pyrophosphate + tRNA containing 6-isopentenyladenosine]	G
NC_008611	MUL_3470	573	3849942	G	C	NON	Q	H	1	hypothetical protein	cytoplasmic protein function unknown but contains tetrapyrrole methyltransferase domain and MazG-like (predicted pyrophosphatase) domain	C
NC_008611	MUL_3470	673	3850042	G	C	NON	V	L	1	hypothetical protein	cytoplasmic protein function unknown but contains tetrapyrrole methyltransferase domain and MazG-like (predicted pyrophosphatase) domain	C
NC_008611	MUL_3470	726	3850095	C	G	SYN	T	T	1	hypothetical protein	cytoplasmic protein function unknown but contains tetrapyrrole methyltransferase domain and MazG-like (predicted pyrophosphatase) domain	G
NC_008611	MUL_3477	460	3857093	A	C	NON	S	A	-1	conserved hypothetical secreted protein	secreted protein	C
NC_008611	MUL_3496	53	3875096	G	C	NON	A	G	-1	hypothetical protein	Detected in the cytoplasmic fraction by 2D-LC- MS/MS. cytoplasmic protein
NC_008611	MUL_3496	25	3875124	C	T	NON	G	R	-1	hypothetical protein	Detected in the cytoplasmic fraction by 2D-LC- MS/MS. cytoplasmic protein	T
NC_008611	MUL_3497	686	3875257	G	A	NON	S	F	-1	conserved membrane protein YfiH	Detected in the membrane fraction by proteomics. membrane protein	A
NC_008611	MUL_3497	247	3875696	C	T	NON	V	M	-1	conserved membrane protein YfiH	Detected in the membrane fraction by proteomics. membrane protein	T
NC_008611	MUL_3503	822	3883258	C	T	SYN	V	V	-1	UDP-N-acetylmuramoylalanine-D-glutamate ligase MurD	membrane protein involved in cell wall formation; peptidoglycan biosynthesis.	T
NC_008611	MUL_3503	406	3883674	T	C	NON	T	A	-1	UDP-N-acetylmuramoylalanine-D-glutamate ligase MurD	membrane protein involved in cell wall formation; peptidoglycan biosynthesis.	C
NC_008611	MUL_3503	318	3883762	C	T	SYN	E	E	-1	UDP-N-acetylmuramoylalanine-D-glutamate ligase MurD	membrane protein involved in cell wall formation; peptidoglycan biosynthesis.	T
NC_008611	MUL_3514	127	3897718	A	G	NON	T	A	1	conserved lipoprotein LppM	Detected in the membrane fraction by proteomics (LC- MS/MS) membrane protein	G
NC_008611	MUL_3514	193	3897784	G	A	NON	G	S	1	conserved lipoprotein LppM	Detected in the membrane fraction by proteomics (LC- MS/MS) membrane protein	A
NC_008611	MUL_3514	438	3898029	G	A	SYN	E	E	1	conserved lipoprotein LppM	Detected in the membrane fraction by proteomics (LC- MS/MS) membrane protein	A
NC_008611	MUL_3515	852	3898330	T	G	SYN	T	T	-1	hypothetical protein	cytoplasmic protein	G
NC_008611	MUL_3515	542	3898640	G	A	NON	T	I	-1	hypothetical protein	cytoplasmic protein	A
NC_008611	MUL_3516	128	3899630	C	A	NON	P	Q	1	geranylgeranyl pyrophosphate synthetase IdsA2	Detected in the membrane fraction by proteomics. cytoplasmic protein involved in lipid biosynthesis.	A
NC_008611	MUL_3516	240	3899742	G	A	SYN	T	T	1	geranylgeranyl pyrophosphate synthetase IdsA2	Detected in the membrane fraction by proteomics. cytoplasmic protein involved in lipid biosynthesis.	A
NC_008611	MUL_3516	257	3899759	T	C	NON	M	T	1	geranylgeranyl pyrophosphate synthetase IdsA2	Detected in the membrane fraction by proteomics. cytoplasmic protein involved in lipid biosynthesis.	C
NC_008611	MUL_3516	911	3900413	A	T	NON	N	I	1	geranylgeranyl pyrophosphate synthetase IdsA2	Detected in the membrane fraction by proteomics. cytoplasmic protein involved in lipid biosynthesis.	T
NC_008611	MUL_3517	184	3900845	G	A	NON	G	S	1	hypothetical protein	membrane protein
NC_008611	MUL_3517	196	3900857	G	C	NON	E	Q	1	hypothetical protein	membrane protein
NC_008611	MUL_3517	369	3901030	G	A	SYN	V	V	1	hypothetical protein	membrane protein	A
NC_008611	MUL_3517	1237	3901898	G	A	NON	V	I	1	hypothetical protein	membrane protein
NC_008611	MUL_3518	286	3902267	A	G	NON	S	P	-1	conserved regulatory protein	Detected in the cytoplasmic fraction by 2D-LC- MS/MS. cytoplasmic protein
NC_008611	MUL_3519	1002	3903644	G	C	NON	E	D	1	transmembrane serine/threonine-protein kinase L PknL	membrane protein involved in signal transduction (via phosphorylation)
NC_008611	MUL_3519	1188	3903830	G	A	SYN	Q	Q	1	transmembrane serine/threonine-protein kinase L PknL	membrane protein involved in signal transduction (via phosphorylation)	A
NC_008611	MUL_3522	556	3907643	C	G	NON	V	L	-1	hydroxymethylglutaryl-coenzyme a (HMG-CoA) reductase	cytoplasmic protein HMGR is a tightly regulated enzyme, which catalyzes the synthesis of coenzyme a and mevalonate in isoprenoid synthesis. in mammals, this is the rate limiting committed step in cholesterol biosynthesis. bacteria, such as pseudomonas mevalonii, which rely solely on mevalonate for their carbon source, catalyze the reverse reaction, using an NAD-dependent HMGR to deacetylate meval…	G
NC_008611	MUL_3536	340	3922492	A	G	NON	T	A	1	hypothetical protein	membrane protein
NC_008611	MUL_3536	344	3922496	C	G	NON	A	G	1	hypothetical protein	membrane protein
NC_008611	MUL_3560	62	3947999	C	G	NON	A	G	1	hypothetical protein	Detected in the membrane fraction by proteomics (LC- MS/MS) cytoplasmic protein
NC_008611	MUL_3560	472	3948409	G	A	NON	E	K	1	hypothetical protein	Detected in the membrane fraction by proteomics (LC- MS/MS) cytoplasmic protein	A
NC_008611	MUL_3573	64	3960003	C	G	NON	R	G	1	leucyl aminopeptidase PepB	Detected in the membrane fraction by proteomics, and in the cytoplasmic fraction by LCMSMS cytoplasmic protein release of an N-terminal amino acid, Xaa-|-Xbb-, in which Xaa is preferably Leu, but may be other amino acids including Pro although not Arg or Lys, and Xbb may be Pro.	G
NC_008611	MUL_3573	532	3960471	A	G	NON	T	A	1	leucyl aminopeptidase PepB	Detected in the membrane fraction by proteomics, and in the cytoplasmic fraction by LCMSMS cytoplasmic protein release of an N-terminal amino acid, Xaa-|-Xbb-, in which Xaa is preferably Leu, but may be other amino acids including Pro although not Arg or Lys, and Xbb may be Pro.	G
NC_008611	MUL_3573	722	3960661	G	A	NON	G	E	1	leucyl aminopeptidase PepB	Detected in the membrane fraction by proteomics, and in the cytoplasmic fraction by LCMSMS cytoplasmic protein release of an N-terminal amino acid, Xaa-|-Xbb-, in which Xaa is preferably Leu, but may be other amino acids including Pro although not Arg or Lys, and Xbb may be Pro.	A
NC_008611	MUL_3573	802	3960741	T	C	SYN	L	L	1	leucyl aminopeptidase PepB	Detected in the membrane fraction by proteomics, and in the cytoplasmic fraction by LCMSMS cytoplasmic protein release of an N-terminal amino acid, Xaa-|-Xbb-, in which Xaa is preferably Leu, but may be other amino acids including Pro although not Arg or Lys, and Xbb may be Pro.	C
NC_008611	MUL_3574	625	3963122	C	G	NON	D	H	-1	short-chain dehydrogenase EphD	Detected in the membrane fraction by proteomics (LC- MS/MS) membrane protein thought to be involved in detoxification reactions following oxidative damage to lipids.	G
NC_008611	MUL_3575	108	3964082	A	G	SYN	L	L	1	pyruvate dehydrogenase (E2 component) SucB	Detected in the cytoplasmic, the extracellular matrix, and the membrane fraction by proteomics. cytoplasmic protein involved in tricarboxylic acid cycle; converts 2- oxoglutarate to succinyl-CoA and CO2	G
NC_008611	MUL_3575	374	3964348	C	G	NON	A	G	1	pyruvate dehydrogenase (E2 component) SucB	Detected in the cytoplasmic, the extracellular matrix, and the membrane fraction by proteomics. cytoplasmic protein involved in tricarboxylic acid cycle; converts 2- oxoglutarate to succinyl-CoA and CO2
NC_008611	MUL_3575	386	3964360	T	C	NON	V	A	1	pyruvate dehydrogenase (E2 component) SucB	Detected in the cytoplasmic, the extracellular matrix, and the membrane fraction by proteomics. cytoplasmic protein involved in tricarboxylic acid cycle; converts 2- oxoglutarate to succinyl-CoA and CO2
NC_008611	MUL_3575	1609	3965583	G	T	NON	D	Y	1	pyruvate dehydrogenase (E2 component) SucB	Detected in the cytoplasmic, the extracellular matrix, and the membrane fraction by proteomics. cytoplasmic protein involved in tricarboxylic acid cycle; converts 2- oxoglutarate to succinyl-CoA and CO2	T
NC_008611	MUL_3581	187	3972090	C	G	NON	V	L	-1	phage-related integrase	cytoplasmic protein DNA integration. this sequence contains a DNA breaking-rejoining catalytic core found in phage integrase genes.	G
NC_008611	MUL_3581	172	3972105	G	A	SYN	L	L	-1	phage-related integrase	cytoplasmic protein DNA integration. this sequence contains a DNA breaking-rejoining catalytic core found in phage integrase genes.	A
NC_008611	MUL_3582	342	3972846	T	C	SYN	E	E	-1	hypothetical protein	membrane protein	C
NC_008611	MUL_3582	322	3972866	C	T	NON	V	I	-1	hypothetical protein	membrane protein	T
NC_008611	MUL_5087	154	3973638	C	G	NON	A	P	-1	hypothetical protein	cytoplasmic protein	G
NC_008611	MUL_3589	392	3980146	C	G	NON	P	R	1	lipoprotein peptidase LpqM	secreted protein function unknown, possibly hydrolyzes peptides and/or proteins.	G
NC_008611	MUL_3589	462	3980216	T	C	SYN	A	A	1	lipoprotein peptidase LpqM	secreted protein function unknown, possibly hydrolyzes peptides and/or proteins.	C
NC_008611	MUL_3589	1469	3981223	C	T	NON	A	V	1	lipoprotein peptidase LpqM	secreted protein function unknown, possibly hydrolyzes peptides and/or proteins.	T
NC_008611	MUL_3610	600	4011976	G	A	SYN	N	N	-1	glycyl-tRNA synthetase GlyS	Detected in the cytoplasmic fraction by 2D-LC- MS/MS. cytoplasmic protein involved in translation mechanisms [catalytic activity: ATP + L-glycine + tRNA(Gly) = AMP + pyrophosphate + L-glycyl-tRNA(Gly)]	A
NC_008611	MUL_3610	259	4012317	G	A	SYN	L	L	-1	glycyl-tRNA synthetase GlyS	Detected in the cytoplasmic fraction by 2D-LC- MS/MS. cytoplasmic protein involved in translation mechanisms [catalytic activity: ATP + L-glycine + tRNA(Gly) = AMP + pyrophosphate + L-glycyl-tRNA(Gly)]	A
NC_008611	MUL_3624	205	4023317	C	A	NON	H	N	1	hypothetical protein	cytoplasmic protein	A
NC_008611	MUL_3624	388	4023500	G	A	NON	D	S	1	hypothetical protein	cytoplasmic protein	A
NC_008611	MUL_3624	389	4023501	A	G	NON	D	S	1	hypothetical protein	cytoplasmic protein
NC_008611	MUL_3624	464	4023576	G	A	NON	S	N	1	hypothetical protein	cytoplasmic protein	A
NC_008611	MUL_3632	3297	4029881	G	C	SYN	A	A	-1	phenyloxazoline synthase MbtB	cytoplasmic protein involved in the biogenesis of the hydroxyphenyloxazoline-containing siderophore mycobactins. this peptide synthase forms amide bound between the carboxylic acid of salicylate and the alpha-amino group of serine (serine/threonine ligation)	C
NC_008611	MUL_3632	1590	4031588	G	C	SYN	S	S	-1	phenyloxazoline synthase MbtB	cytoplasmic protein involved in the biogenesis of the hydroxyphenyloxazoline-containing siderophore mycobactins. this peptide synthase forms amide bound between the carboxylic acid of salicylate and the alpha-amino group of serine (serine/threonine ligation)	C
NC_008611	MUL_3632	834	4032344	A	C	SYN	P	P	-1	phenyloxazoline synthase MbtB	cytoplasmic protein involved in the biogenesis of the hydroxyphenyloxazoline-containing siderophore mycobactins. this peptide synthase forms amide bound between the carboxylic acid of salicylate and the alpha-amino group of serine (serine/threonine ligation)	C
NC_008611	MUL_3642	87	4052445	G	C	SYN	A	A	1	acetyl hydrolase MbtJ	cytoplasmic protein involved in the biogenesis of the hydroxyphenyloxazoline-containing siderophore mycobactins. possibly required for N-hydroxylation of the two lysine residues at some stage during mycobactin assembly.
NC_008611	MUL_3642	88	4052446	G	C	NON	A	P	1	acetyl hydrolase MbtJ	cytoplasmic protein involved in the biogenesis of the hydroxyphenyloxazoline-containing siderophore mycobactins. possibly required for N-hydroxylation of the two lysine residues at some stage during mycobactin assembly.
NC_008611	MUL_3642	135	4052493	T	C	SYN	V	V	1	acetyl hydrolase MbtJ	cytoplasmic protein involved in the biogenesis of the hydroxyphenyloxazoline-containing siderophore mycobactins. possibly required for N-hydroxylation of the two lysine residues at some stage during mycobactin assembly.	C
NC_008611	MUL_3642	169	4052527	C	T	SYN	L	L	1	acetyl hydrolase MbtJ	cytoplasmic protein involved in the biogenesis of the hydroxyphenyloxazoline-containing siderophore mycobactins. possibly required for N-hydroxylation of the two lysine residues at some stage during mycobactin assembly.	T
NC_008611	MUL_3647	626	4057176	A	G	NON	L	P	-1	hypothetical protein	cytoplasmic protein	G
NC_008611	MUL_3647	59	4057743	C	T	NON	G	E	-1	hypothetical protein	cytoplasmic protein	T
NC_008611	MUL_3663	442	4075267	A	G	NON	S	G	1	FAD-dependent oxidoreductase	cytoplasmic protein function unknown, probably involved in cellular metabolism	G
NC_008611	MUL_3665	321	4078660	T	C	SYN	E	E	-1	conserved hypothetical lipoprotein, LppR	secreted protein	C
NC_008611	MUL_3665	227	4078754	G	A	NON	A	V	-1	conserved hypothetical lipoprotein, LppR	secreted protein	A
NC_008611	MUL_3665	208	4078773	T	G	NON	T	P	-1	conserved hypothetical lipoprotein, LppR	secreted protein	G
NC_008611	MUL_3665	23	4078958	G	A	NON	A	V	-1	conserved hypothetical lipoprotein, LppR	secreted protein	A
NC_008611	MUL_3670	527	4083512	G	A	NON	G	D	1	metal-dependent hydrolase	cytoplasmic protein function unknown, belongs to the beta-lactamase superfamily III
NC_008611	MUL_3671	238	4084225	G	C	NON	V	L	1	PE-PGRS family protein	PE_PGRS2; membrane protein	C
NC_008611	MUL_3672	296	4085667	C	T	NON	S	L	1	PE-PGRS family protein	PE_PGRS25; membrane protein	T
NC_008611	MUL_3672	302	4085673	A	G	NON	D	G	1	PE-PGRS family protein	PE_PGRS25; membrane protein	G
NC_008611	MUL_3680	434	4095122	G	C	NON	S	W	-1	conserved hypothetical membrane protein ComEA	membrane protein function unknown but domain identity suggests ComEA. a family of DNA uptake protein and related DNA- binding proteins involved in DNA replication, recombination, and repair.	C
NC_008611	MUL_3682	437	4097420	T	G	NON	I	S	1	acyl-CoA dehydrogenase FadE18_2	cytoplasmic protein function unknown, but supposed involvement in lipid metabolism.	G
NC_008611	MUL_3683	466	4098823	T	C	SYN	L	L	1	hypothetical protein	membrane protein function unknown but contains FAD/NAD(P)-binding superfamily domain	C
NC_008611	MUL_3694	1004	4111565	C	T	NON	R	Q	-1	hypothetical protein	cytoplasmic protein function unknown but contains a von willebrand factor type a conserved domain	T
NC_008611	MUL_3694	520	4112049	A	G	SYN	L	L	-1	hypothetical protein	cytoplasmic protein function unknown but contains a von willebrand factor type a conserved domain	G
NC_008611	MUL_3694	505	4112064	C	T	NON	E	K	-1	hypothetical protein	cytoplasmic protein function unknown but contains a von willebrand factor type a conserved domain	T
NC_008611	MUL_3699	799	4119206	G	C	NON	P	A	-1	hypothetical protein	cytoplasmic protein function unknown but domain identity suggests that it may be a mechanosensitive (ms) ion channel protein with a C-term putative cyclic nucleotide (camp or cGMP) binding domain.
NC_008611	MUL_3699	176	4119829	A	C	NON	L	R	-1	hypothetical protein	cytoplasmic protein function unknown but domain identity suggests that it may be a mechanosensitive (ms) ion channel protein with a C-term putative cyclic nucleotide (camp or cGMP) binding domain.
NC_008611	MUL_3699	175	4119830	A	G	NON	L	R	-1	hypothetical protein	cytoplasmic protein function unknown but domain identity suggests that it may be a mechanosensitive (ms) ion channel protein with a C-term putative cyclic nucleotide (camp or cGMP) binding domain.	G
NC_008611	MUL_3699	171	4119834	C	G	NON	L	F	-1	hypothetical protein	cytoplasmic protein function unknown but domain identity suggests that it may be a mechanosensitive (ms) ion channel protein with a C-term putative cyclic nucleotide (camp or cGMP) binding domain.	G
NC_008611	MUL_3705	874	4128280	T	G	NON	N	H	-1	glutamine-dependent NAD(+) synthetase NadE	Detected in the membrane fraction by proteomics (2D- LC-MS/MS) cytoplasmic protein involved in biosynthesis of NAD. can use both glutamine or ammonia as a nitrogen source [catalytic activity: ATP + deamido-NAD(+) + L-glutamine + H(2)O = AMP + diphosphate + NAD(+) + L-glutamate]
NC_008611	MUL_3708	409	4132196	A	G	NON	T	A	1	transcriptional regulatory protein (AcrR family)	cytoplasmic protein function unknown. possibly involved in transcriptional mechanism.
NC_008611	MUL_3708	609	4132396	G	C	SYN	A	A	1	transcriptional regulatory protein (AcrR family)	cytoplasmic protein function unknown. possibly involved in transcriptional mechanism.	C
NC_008611	MUL_3714	225	4140086	A	G	SYN	I	I	-1	50S ribosomal protein L21 RplU	Detected in the cytoplasmic fraction by 2D-LC- MS/MS. cytoplasmic protein involved in translation mechanisms.	G
NC_008611	MUL_3715	2884	4140666	G	A	NON	L	F	-1	ribonuclease E Rne	cytoplasmic protein thought to be involved in several cellular process.	A
NC_008611	MUL_3715	2872	4140678	G	A	NON	R	C	-1	ribonuclease E Rne	cytoplasmic protein thought to be involved in several cellular process.	A
NC_008611	MUL_3715	2839	4140711	T	C	NON	S	G	-1	ribonuclease E Rne	cytoplasmic protein thought to be involved in several cellular process.	C
NC_008611	MUL_3715	2434	4141116	A	G	NON	Y	H	-1	ribonuclease E Rne	cytoplasmic protein thought to be involved in several cellular process.	G
NC_008611	MUL_3715	248	4143302	T	C	NON	D	G	-1	ribonuclease E Rne	cytoplasmic protein thought to be involved in several cellular process.	C
NC_008611	MUL_3721	602	4149648	G	T	NON	T	K	-1	hypothetical protein	membrane protein	T
NC_008611	MUL_3721	487	4149763	A	T	NON	C	S	-1	hypothetical protein	membrane protein	T
NC_008611	MUL_3722	593	4151012	G	T	NON	A	D	-1	hypothetical protein	Detected in the membrane fraction by proteomics (2D- LC-MS/MS) Also Detected in the extracellular matrix and the cytoplasmic fractions by proteomics. membrane protein function unknown but contains potential saccharopine-like dehydrogenase domain	T
NC_008611	MUL_3722	585	4151020	G	A	SYN	V	V	-1	hypothetical protein	Detected in the membrane fraction by proteomics (2D- LC-MS/MS) Also Detected in the extracellular matrix and the cytoplasmic fractions by proteomics. membrane protein function unknown but contains potential saccharopine-like dehydrogenase domain
NC_008611	MUL_3723	49	4152367	A	G	NON	F	L	-1	resuscitation-promoting factor RpfE	secreted protein thought to promote the resuscitation and growth of dormant, nongrowing cells. could also stimulate the growth of several other high G+C Gram+ organisms, E.G. mycobacterium avium, mycobacterium bovis (BCG), mycobacterium kansasii, mycobacterium smegmatis.	G
NC_008611	MUL_3741	333	4171289	G	A	SYN	L	L	-1	N-term PE-PGRS family protein	PE_PGRS59; membrane protein	A
NC_008611	MUL_3746	195	4176347	A	G	SYN	Q	Q	1	globin (oxygen-binding protein) GlbO	cytoplasmic protein oxygen carrier, involved in oxygen transport.	G
NC_008611	MUL_3746	211	4176363	C	A	NON	L	M	1	globin (oxygen-binding protein) GlbO	cytoplasmic protein oxygen carrier, involved in oxygen transport.	A
NC_008611	MUL_3769	121	4207492	C	G	NON	A	P	-1	hypothetical protein	cytoplasmic protein	G
NC_008611	MUL_3769	106	4207507	C	A	NON	G	C	-1	hypothetical protein	cytoplasmic protein
NC_008611	MUL_3770	560	4208731	A	G	NON	V	A	-1	cobyric acid synthase CobQ1	cytoplasmic protein involved in cobalamin biosynthesis	G
NC_008611	MUL_3775	1032	4213885	G	A	SYN	R	R	-1	pyruvate dehydrogenase E1 component (alpha subunit) PdhA	cytoplasmic protein involved in energy metabolism. the pyruvate dehydrogenase complex catalyzes the overall conversion of pyruvate to acetyl-CoA & CO(2) it contains multiple copies of three enzymatic components: pyruvate dehydrogenase (E1), dihydrolipoamide acetyltransferase (E2) & lipoamide dehydrogenase (E3) [catalytic activity: acetyl-CoA + dihydrolipoamide = CoA + S- acetyldihydrolipoamide]	A
NC_008611	MUL_3775	391	4214526	C	T	NON	G	S	-1	pyruvate dehydrogenase E1 component (alpha subunit) PdhA	cytoplasmic protein involved in energy metabolism. the pyruvate dehydrogenase complex catalyzes the overall conversion of pyruvate to acetyl-CoA & CO(2) it contains multiple copies of three enzymatic components: pyruvate dehydrogenase (E1), dihydrolipoamide acetyltransferase (E2) & lipoamide dehydrogenase (E3) [catalytic activity: acetyl-CoA + dihydrolipoamide = CoA + S- acetyldihydrolipoamide]	T
NC_008611	MUL_3775	371	4214546	A	G	NON	V	A	-1	pyruvate dehydrogenase E1 component (alpha subunit) PdhA	cytoplasmic protein involved in energy metabolism. the pyruvate dehydrogenase complex catalyzes the overall conversion of pyruvate to acetyl-CoA & CO(2) it contains multiple copies of three enzymatic components: pyruvate dehydrogenase (E1), dihydrolipoamide acetyltransferase (E2) & lipoamide dehydrogenase (E3) [catalytic activity: acetyl-CoA + dihydrolipoamide = CoA + S- acetyldihydrolipoamide]	G
NC_008611	MUL_3781	75	4221934	G	A	SYN	G	G	-1	succinyl-CoA:3-ketoacid-coenzyme a transferase (beta subunit) ScoB	Detected in the cytoplasmic fraction by 2D-LC- MS/MS. cytoplasmic protein involved in various degradation and synthesis [catalytic activity: succinyl-CoA + a 3-oxo acid = succinate + a 3-oxo-acyl-CoA]	A
NC_008611	MUL_3802	7	4243337	G	T	NON	V	L	1	hypothetical protein	cytoplasmic protein	T
NC_008611	MUL_3802	290	4243620	A	G	NON	D	G	1	hypothetical protein	cytoplasmic protein	G
NC_008611	MUL_3809	1658	4249705	C	T	NON	A	V	1	hypothetical protein	membrane protein	T
NC_008611	MUL_3809	1663	4249710	A	G	NON	N	D	1	hypothetical protein	membrane protein	G
NC_008611	MUL_3809	1680	4249727	T	G	NON	H	Q	1	hypothetical protein	membrane protein	G
NC_008611	MUL_3818	8060	4257474	T	C	NON	N	S	-1	fatty acid synthase Fas	Detected in the membrane fraction by proteomics (LC- MS/MS) Also detected in the cytoplasm. membrane protein involved in lipid metabolism. fatty acid synthase catalyzes the formation of long-chain fatty acids from acetyl-CoA, malonyl-CoA and NADPH	C
NC_008611	MUL_3818	5530	4260004	T	G	NON	K	Q	-1	fatty acid synthase Fas	Detected in the membrane fraction by proteomics (LC- MS/MS) Also detected in the cytoplasm. membrane protein involved in lipid metabolism. fatty acid synthase catalyzes the formation of long-chain fatty acids from acetyl-CoA, malonyl-CoA and NADPH	G
NC_008611	MUL_3818	5451	4260083	T	C	SYN	L	L	-1	fatty acid synthase Fas	Detected in the membrane fraction by proteomics (LC- MS/MS) Also detected in the cytoplasm. membrane protein involved in lipid metabolism. fatty acid synthase catalyzes the formation of long-chain fatty acids from acetyl-CoA, malonyl-CoA and NADPH	C
NC_008611	MUL_3818	2823	4262711	A	G	SYN	A	A	-1	fatty acid synthase Fas	Detected in the membrane fraction by proteomics (LC- MS/MS) Also detected in the cytoplasm. membrane protein involved in lipid metabolism. fatty acid synthase catalyzes the formation of long-chain fatty acids from acetyl-CoA, malonyl-CoA and NADPH	G
NC_008611	MUL_3818	2373	4263161	G	A	SYN	F	F	-1	fatty acid synthase Fas	Detected in the membrane fraction by proteomics (LC- MS/MS) Also detected in the cytoplasm. membrane protein involved in lipid metabolism. fatty acid synthase catalyzes the formation of long-chain fatty acids from acetyl-CoA, malonyl-CoA and NADPH	A
NC_008611	MUL_3818	2158	4263376	T	C	NON	T	A	-1	fatty acid synthase Fas	Detected in the membrane fraction by proteomics (LC- MS/MS) Also detected in the cytoplasm. membrane protein involved in lipid metabolism. fatty acid synthase catalyzes the formation of long-chain fatty acids from acetyl-CoA, malonyl-CoA and NADPH	C
NC_008611	MUL_3818	1596	4263938	G	T	NON	N	K	-1	fatty acid synthase Fas	Detected in the membrane fraction by proteomics (LC- MS/MS) Also detected in the cytoplasm. membrane protein involved in lipid metabolism. fatty acid synthase catalyzes the formation of long-chain fatty acids from acetyl-CoA, malonyl-CoA and NADPH	T
NC_008611	MUL_3819	344	4266420	G	C	NON	A	G	-1	conserved hypothetical secreted protein	secreted protein
NC_008611	MUL_3820	205	4267209	C	T	NON	R	C	1	ring-hydroxylating dioxygenase, large terminal subunit	may act to bind either a ubiquinol or plastoquinol anion, transferring an electron to the 2Fe-2S cluster, then releasing the electron to a cytochrome C or cytochrome F haem iron.	T
NC_008611	MUL_3820	604	4267608	G	A	NON	D	N	1	ring-hydroxylating dioxygenase, large terminal subunit	may act to bind either a ubiquinol or plastoquinol anion, transferring an electron to the 2Fe-2S cluster, then releasing the electron to a cytochrome C or cytochrome F haem iron.
NC_008611	MUL_3826	207	4273321	G	A	NON	W	*	1	hypothetical protein	membrane protein function unknown, possibly involved in transport of drug across the membrane. contains AraJ, arabinose efflux permease domain identity.	A
NC_008611	MUL_3826	222	4273336	T	C	SYN	Y	Y	1	hypothetical protein	membrane protein function unknown, possibly involved in transport of drug across the membrane. contains AraJ, arabinose efflux permease domain identity.	C
NC_008611	MUL_3826	307	4273421	T	C	SYN	L	L	1	hypothetical protein	membrane protein function unknown, possibly involved in transport of drug across the membrane. contains AraJ, arabinose efflux permease domain identity.	C
NC_008611	MUL_3826	449	4273563	G	C	NON	R	P	1	hypothetical protein	membrane protein function unknown, possibly involved in transport of drug across the membrane. contains AraJ, arabinose efflux permease domain identity.	C
NC_008611	MUL_3826	659	4273773	G	A	NON	G	E	1	hypothetical protein	membrane protein function unknown, possibly involved in transport of drug across the membrane. contains AraJ, arabinose efflux permease domain identity.	A
NC_008611	MUL_3826	1109	4274223	C	T	NON	T	M	1	hypothetical protein	membrane protein function unknown, possibly involved in transport of drug across the membrane. contains AraJ, arabinose efflux permease domain identity.	T
NC_008611	MUL_3826	1555	4274669	T	C	NON	S	P	1	hypothetical protein	membrane protein function unknown, possibly involved in transport of drug across the membrane. contains AraJ, arabinose efflux permease domain identity.	C
NC_008611	MUL_3826	1569	4274683	A	G	SYN	S	S	1	hypothetical protein	membrane protein function unknown, possibly involved in transport of drug across the membrane. contains AraJ, arabinose efflux permease domain identity.	G
NC_008611	MUL_3829	988	4276806	A	T	NON	Y	N	-1	oxidoreductase	cytoplasmic protein function unknown, probably involved in cellular metabolism. contains domain identity to phenylpropionate dioxygenase and related ring-hydroxylating dioxygenases.	T
NC_008611	MUL_3829	104	4277690	G	A	NON	T	M	-1	oxidoreductase	cytoplasmic protein function unknown, probably involved in cellular metabolism. contains domain identity to phenylpropionate dioxygenase and related ring-hydroxylating dioxygenases.	A
NC_008611	MUL_3832	225	4281315	G	A	SYN	R	R	1	transcriptional regulatory protein (FadR family)	cytoplasmic protein involved in transcriptional mechanism.	A
NC_008611	MUL_3840	260	4292441	A	G	NON	D	G	1	acyl-CoA dehydrogenase	cytoplasmic protein function unknown, but involved in lipid degradation.	G
NC_008611	MUL_3840	1034	4293215	C	T	NON	A	V	1	acyl-CoA dehydrogenase	cytoplasmic protein function unknown, but involved in lipid degradation.	T
NC_008611	MUL_3858	84	4313176	G	C	NON	E	D	1	conserved hypothetical alanine-rich protein
NC_008611	MUL_3883	212	4339877	G	A	NON	G	D	1	hypothetical protein	cytoplasmic protein	A
NC_008611	MUL_3883	235	4339900	A	G	NON	T	A	1	hypothetical protein	cytoplasmic protein	G
NC_008611	MUL_3884	309	4340707	C	T	SYN	R	R	1	transcriptional regulatory protein	cytoplasmic protein involved in transcriptional mechanism	T
NC_008611	MUL_3884	462	4340860	G	C	SYN	A	A	1	transcriptional regulatory protein	cytoplasmic protein involved in transcriptional mechanism	C
NC_008611	MUL_3908	148	4365531	A	G	NON	S	P	-1	ribonuclease RphA	cytoplasmic protein RNase ph is a phosphorolytic exoribonuclease that removes nucleotide residues following the -CCA terminus of tRNA and adds nucleotides to the ends of RNA molecules by using nucleoside diphosphates as substrates [catalytic activity: {tRNA}(n+1) + phosphate = {tRNA}(N) + a nucleoside diphosphate]	G
NC_008611	MUL_3928	304	4384755	G	C	NON	H	D	-1	conserved hypothetical protease	cytoplasmic protein function unknown but domain identity suggests this CDS encodes a metal-dependent protease of the Pad1/Jab1 superfamily.	C
NC_008611	MUL_3932	385	4387512	G	A	NON	V	I	1	nicotinic acid phosphoribosyltransferase PncB	cytoplasmic protein nicotinate D-ribonucleotide + diphosphate <=> nicotinate + 5-phospho-alpha-D-ribose 1 diphosphate.	A
NC_008611	MUL_3932	473	4387600	C	G	NON	P	R	1	nicotinic acid phosphoribosyltransferase PncB	cytoplasmic protein nicotinate D-ribonucleotide + diphosphate <=> nicotinate + 5-phospho-alpha-D-ribose 1 diphosphate.	G
NC_008611	MUL_3938	840	4399069	A	G	SYN	G	G	-1	acetyl-CoA acetyltransferase FadA4	cytoplasmic protein function unknown, but supposed involvement in lipid degradation [catalytic activity: 2 acetyl-CoA = CoA + acetoacetyl-CoA]
NC_008611	MUL_3938	531	4399378	C	T	SYN	E	E	-1	acetyl-CoA acetyltransferase FadA4	cytoplasmic protein function unknown, but supposed involvement in lipid degradation [catalytic activity: 2 acetyl-CoA = CoA + acetoacetyl-CoA]	T
NC_008611	MUL_3938	238	4399671	T	G	NON	T	P	-1	acetyl-CoA acetyltransferase FadA4	cytoplasmic protein function unknown, but supposed involvement in lipid degradation [catalytic activity: 2 acetyl-CoA = CoA + acetoacetyl-CoA]	G
NC_008611	MUL_3939	208	4400198	A	T	NON	T	S	1	glyoxalase, GloA_1	Detected in the cytoplasmic fraction by 2D-LC- MS/MS. cytoplasmic protein glyoxalase I (lactoylglutathione lyase) catalyzes the first step of the glyoxal pathway.	T
NC_008611	MUL_3951	58	4416610	C	T	SYN	L	L	1	cobalamin adenosyltransferase	Detected in the cytoplamic fraction by LC-MS/MS. Also detected in the membrane fraction by proteomics (2D- LC-MS/MS) membrane protein these proteins convert inactive cobalamins to AdoCbl for 1,2-propanediol degradation.	T
NC_008611	MUL_3951	534	4417086	G	C	SYN	A	A	1	cobalamin adenosyltransferase	Detected in the cytoplamic fraction by LC-MS/MS. Also detected in the membrane fraction by proteomics (2D- LC-MS/MS) membrane protein these proteins convert inactive cobalamins to AdoCbl for 1,2-propanediol degradation.	C
NC_008611	MUL_3957	876	4422691	G	A	SYN	V	V	-1	ATP synthase delta chain AtpH	Detected in the membrane fraction by proteomics. membrane protein this protein seems to be part of the stalk that links cf(0) to cf(1) it either transmits conformational changes from cf(0) into cf(1) or is implicated in proton conduction [catalytic activity : ATP + H(2)O + H(+)(in) = ADP + phosphate + H(+)(out)]	A
NC_008611	MUL_3962	228	4426912	A	C	SYN	G	G	-1	undecapaprenyl-phosphate alpha-N- acetylglucosaminyltransferase Rfe	membrane protein catalysis of the first step of the lipid cycle reactions in the biosynthesis of cell wall peptidoglycan.	C
NC_008611	MUL_3962	217	4426923	T	C	NON	M	V	-1	undecapaprenyl-phosphate alpha-N- acetylglucosaminyltransferase Rfe	membrane protein catalysis of the first step of the lipid cycle reactions in the biosynthesis of cell wall peptidoglycan.
NC_008611	MUL_3962	210	4426930	A	C	SYN	G	G	-1	undecapaprenyl-phosphate alpha-N- acetylglucosaminyltransferase Rfe	membrane protein catalysis of the first step of the lipid cycle reactions in the biosynthesis of cell wall peptidoglycan.	C
NC_008611	MUL_3963	308	4427561	A	G	NON	V	A	-1	hypothetical protein	function unknown but contains YrdC domain. this domain has been shown to preferentially bind to dsRNA.	G
NC_008611	MUL_3967	229	4432001	T	C	NON	T	A	-1	transcription termination factor Rho	Detected in the cytoplasmic fraction by 2D-LC- MS/MS. cytoplasmic protein facilitates transcription termination by a mechanism that involves Rho binding to the nascent RNA, activation of rho's RNA-dependent ATPase activity, and release of the mRNA from the DNA template	C
NC_008611	MUL_3968	366	4433075	A	G	SYN	G	G	-1	homoserine kinase ThrB	cytoplasmic protein threonine biosynthesis from asparate (fourth step) [catalytic activity : ATP + L-homoserine = ADP + O-phospho- L-homoserine]	G
NC_008611	MUL_3968	265	4433176	G	A	NON	R	C	-1	homoserine kinase ThrB	cytoplasmic protein threonine biosynthesis from asparate (fourth step) [catalytic activity : ATP + L-homoserine = ADP + O-phospho- L-homoserine]	A
NC_008611	MUL_3968	250	4433191	T	C	NON	T	A	-1	homoserine kinase ThrB	cytoplasmic protein threonine biosynthesis from asparate (fourth step) [catalytic activity : ATP + L-homoserine = ADP + O-phospho- L-homoserine]	C
NC_008611	MUL_3980	1754	4445535	C	G	NON	R	P	-1	peptidase S15	cytoplasmic protein cleaves xaa-pro-releasing N-terminal dipeptides.	G
NC_008611	MUL_3980	1737	4445552	C	A	SYN	S	S	-1	peptidase S15	cytoplasmic protein cleaves xaa-pro-releasing N-terminal dipeptides.	A
NC_008611	MUL_3980	914	4446375	C	A	NON	C	F	-1	peptidase S15	cytoplasmic protein cleaves xaa-pro-releasing N-terminal dipeptides.	A
NC_008611	MUL_3980	783	4446506	G	A	SYN	H	H	-1	peptidase S15	cytoplasmic protein cleaves xaa-pro-releasing N-terminal dipeptides.	A
NC_008611	MUL_3980	146	4447143	G	A	NON	A	V	-1	peptidase S15	cytoplasmic protein cleaves xaa-pro-releasing N-terminal dipeptides.	A
NC_008611	MUL_3980	37	4447252	T	C	NON	T	A	-1	peptidase S15	cytoplasmic protein cleaves xaa-pro-releasing N-terminal dipeptides.	C
NC_008611	MUL_3991	684	4458138	C	T	NON	W	*	-1	flavin-dependent oxidoreductase	cytoplasmic protein function unknown, probably involved in cellular metabolism.	T
NC_008611	MUL_3991	211	4458611	C	T	NON	E	K	-1	flavin-dependent oxidoreductase	cytoplasmic protein function unknown, probably involved in cellular metabolism.	T
NC_008611	MUL_4004	533	4472395	G	A	NON	S	F	-1	dehydrogenase fad flavoprotein Gmc oxidoreductase	cytoplasmic protein function unknown, probably involved in cellular metabolism, probably electron-transfer-linked.	A
NC_008611	MUL_4018	1125	4489764	T	A	NON	D	E	1	transcriptional regulatory protein EmbR	cytoplasmic protein involved in transcriptional mechanism. thought to regulate the biosynthesis of the mycobacterial cell wall arabinan and resistance to ethambutol (Emb; dextro-2,2'- (ethylenediimino)-di-1-butanol), regulating EmbA and EmbB.	A
NC_008611	MUL_4040	574	4509657	G	A	NON	A	T	1	conserved hypothetical membrane protein CpsA	membrane protein function unknown but contains a cell envelope- related transcriptional attenuator domain. CpsA is a domain of unknown function that is found in the predicted extracellular domain of a number of putative membrane- bound proteins. may play a role in regulation of transcription.	A
NC_008611	MUL_4040	871	4509954	G	A	NON	V	I	1	conserved hypothetical membrane protein CpsA	membrane protein function unknown but contains a cell envelope- related transcriptional attenuator domain. CpsA is a domain of unknown function that is found in the predicted extracellular domain of a number of putative membrane- bound proteins. may play a role in regulation of transcription.	A
NC_008611	MUL_4041	54	4511304	A	G	SYN	I	I	-1	short-chain type dehydrogenase/reductase	cytoplasmic protein function unknown, probably involved in cellular metabolism	G
NC_008611	MUL_4045	952	4514554	C	A	NON	D	Y	-1	8-amino-7-oxononanoate synthase BioF2	cytoplasmic protein could be involved in biotin biosynthesis (at the first step) [catalytic activity: 6-carboxyhexanoyl-CoA + L- alanine = 8-amino-7-oxononanoate + CoA + CO2]	A
NC_008611	MUL_4045	730	4514776	C	G	NON	G	R	-1	8-amino-7-oxononanoate synthase BioF2	cytoplasmic protein could be involved in biotin biosynthesis (at the first step) [catalytic activity: 6-carboxyhexanoyl-CoA + L- alanine = 8-amino-7-oxononanoate + CoA + CO2]	G
NC_008611	MUL_4045	667	4514839	G	C	NON	H	D	-1	8-amino-7-oxononanoate synthase BioF2	cytoplasmic protein could be involved in biotin biosynthesis (at the first step) [catalytic activity: 6-carboxyhexanoyl-CoA + L- alanine = 8-amino-7-oxononanoate + CoA + CO2]	C
NC_008611	MUL_4045	286	4515220	G	A	SYN	L	L	-1	8-amino-7-oxononanoate synthase BioF2	cytoplasmic protein could be involved in biotin biosynthesis (at the first step) [catalytic activity: 6-carboxyhexanoyl-CoA + L- alanine = 8-amino-7-oxononanoate + CoA + CO2]	A
NC_008611	MUL_4052	918	4521402	C	A	SYN	G	G	1	alpha, alpha-trehalose-phosphate synthase [UDP- forming] OtsA	cytoplasmic protein involved in osmoregulatory trehalose biosynthesis. mycobacteria can produce trehalose from glucose 6- phosphate and UDP-glucose (the OtsA-OtsB pathway) from glycogen-like alpha(1-->4)-linked glucose polymers (the TreY-TreZ pathway) and from maltose (the TreS pathway) [catalytic activity: trehalose 6-phosphate + H(2)O = trehalose + orthophosphate]	A
NC_008611	MUL_4052	1338	4521822	C	G	NON	N	K	1	alpha, alpha-trehalose-phosphate synthase [UDP- forming] OtsA	cytoplasmic protein involved in osmoregulatory trehalose biosynthesis. mycobacteria can produce trehalose from glucose 6- phosphate and UDP-glucose (the OtsA-OtsB pathway) from glycogen-like alpha(1-->4)-linked glucose polymers (the TreY-TreZ pathway) and from maltose (the TreS pathway) [catalytic activity: trehalose 6-phosphate + H(2)O = trehalose + orthophosphate]	G
NC_008611	MUL_4063	122	4532280	G	A	NON	T	I	-1	conserved hypothetical membrane protein YrbE4B	membrane protein	A
NC_008611	MUL_4063	107	4532295	T	G	NON	Y	S	-1	conserved hypothetical membrane protein YrbE4B	membrane protein	G
NC_008611	MUL_4063	67	4532335	G	A	NON	L	F	-1	conserved hypothetical membrane protein YrbE4B	membrane protein	A
NC_008611	MUL_4063	50	4532352	G	A	NON	A	V	-1	conserved hypothetical membrane protein YrbE4B	membrane protein	A
NC_008611	MUL_4067	972	4535814	A	G	SYN	E	E	1	acyl-CoA dehydrogenase FadE26	Detected in the membrane fraction by proteomics. membrane protein function unknown, but involved in lipid degradation.	G
NC_008611	MUL_4068	915	4536966	T	G	NON	C	W	1	acyl-CoA dehydrogenase FadE27	cytoplasmic protein function unknown, but involved in lipid degradation.	G
NC_008611	MUL_4074	517	4543547	T	C	NON	R	G	-1	conserved hypothetical fructosamine kinase-like protein	cytoplasmic protein	C
NC_008611	MUL_4074	411	4543653	A	G	SYN	I	I	-1	conserved hypothetical fructosamine kinase-like protein	cytoplasmic protein	G
NC_008611	MUL_4075	1059	4544671	T	G	SYN	T	T	-1	fatty-acid-CoA ligase FadD19_1	cytoplasmic protein function unknown, but involved in lipid degradation.	G
NC_008611	MUL_4075	366	4545364	G	T	NON	D	E	-1	fatty-acid-CoA ligase FadD19_1	cytoplasmic protein function unknown, but involved in lipid degradation.	T
NC_008611	MUL_4076	621	4546384	G	T	SYN	V	V	1	enoyl-CoA hydratase EchA19	cytoplasmic protein oxidizes fatty acids using specific components [catalytic activity: (3S)-3-hydroxyacyl-CoA = trans-2(or 3)-enoyl-CoA + H(2)O]	T
NC_008611	MUL_4077	513	4547335	C	A	NON	Q	H	-1	cytochrome P450 142A3 Cyp142A3	cytoplasmic protein cytochromes P450 are a group of heme-thiolate monooxygenases. they oxidize a variety of structurally unrelated compounds, including steroids, fatty acids, and xenobiotics.	A
NC_008611	MUL_4078	192	4548062	C	T	SYN	Y	Y	1	hypothetical protein	cytoplasmic protein	T
NC_008611	MUL_4078	667	4548537	A	G	NON	T	A	1	hypothetical protein	cytoplasmic protein	G
NC_008611	MUL_4079	798	4548882	A	G	SYN	Y	Y	-1	coenzyme F420-dependent oxidoreductase	cytoplasmic protein function unknown, probably involved in cellular metabolism.	G
NC_008611	MUL_4079	42	4549638	G	A	SYN	P	P	-1	coenzyme F420-dependent oxidoreductase	cytoplasmic protein function unknown, probably involved in cellular metabolism.
NC_008611	MUL_4080	49	4549798	T	C	NON	S	P	1	hypothetical protein	cytoplasmic protein function unknown, contains a C-term predicted nucleic-acid-binding domain	C
NC_008611	MUL_4080	321	4550070	A	G	SYN	A	A	1	hypothetical protein	cytoplasmic protein function unknown, contains a C-term predicted nucleic-acid-binding domain	G
NC_008611	MUL_4080	956	4550705	A	G	NON	D	G	1	hypothetical protein	cytoplasmic protein function unknown, contains a C-term predicted nucleic-acid-binding domain
NC_008611	MUL_4090	258	4560299	G	C	SYN	V	V	1	hypothetical protein	cytoplasmic protein	C
NC_008611	MUL_4099	112	4571089	C	G	NON	P	A	1	conserved hypothetical dehydratase (MaoC-like)	cytoplasmic protein function unknown, probably involved in cellular metabolism.	G
NC_008611	MUL_4099	242	4571219	G	A	NON	G	E	1	conserved hypothetical dehydratase (MaoC-like)	cytoplasmic protein function unknown, probably involved in cellular metabolism.	A
NC_008611	MUL_4099	841	4571818	C	G	NON	L	V	1	conserved hypothetical dehydratase (MaoC-like)	cytoplasmic protein function unknown, probably involved in cellular metabolism.
NC_008611	MUL_4099	844	4571821	G	A	NON	G	S	1	conserved hypothetical dehydratase (MaoC-like)	cytoplasmic protein function unknown, probably involved in cellular metabolism.	A
NC_008611	MUL_4109	118	4580792	A	G	NON	T	A	1	hypothetical protein	cytoplasmic protein function unknown, contains a FMN-binding split barrel domain. possible role in the electron-transfer pathway. the FMN-binding split barrel is related to the ferredoxin reductase-like FAD-binding domain. flavodoxins are an example of a group of proteins with a tightly bound flavin mononucleotide (FMN) that mediate electron transfer at low redox potential.	G
NC_008611	MUL_4110	434	4581665	A	G	NON	V	A	-1	short-chain type dehydrogenase/reductase	cytoplasmic protein function unknown, supposed involvement in cellular metabolism.	G
NC_008611	MUL_4111	696	4582203	A	T	SYN	A	A	-1	short-chain type dehydrogenase/reductase	cytoplasmic protein function unknown, supposed involvement in cellular metabolism.	T
NC_008611	MUL_4111	480	4582419	A	G	SYN	A	A	-1	short-chain type dehydrogenase/reductase	cytoplasmic protein function unknown, supposed involvement in cellular metabolism.	G
NC_008611	MUL_4131	169	4606329	G	C	NON	L	V	-1	arylamine N-acetyltransferase Nat	Detected in the cytoplasmic fraction by 2D-LC- MS/MS. cytoplasmic protein could have a role in acetylating, and hence inactivating, the antitubercular drug isoniazid [catalytic activity: acetyl-CoA + arylamine = CoA + N- acetylarylamine]	C
NC_008611	MUL_4133	294	4607854	G	A	SYN	E	E	1	conserved lipoprotein DsbF	Detected in the secreted fraction by proteomics. secreted protein function unknown, possibly involved in thiol:disulfide interchange. contains PS00013 prokaryotic membrane lipoprotein lipid attachment site, N-term signal pepitde sequence and PS00194 thioredoxin family active site.	A
NC_008611	MUL_4133	524	4608084	T	G	NON	V	G	1	conserved lipoprotein DsbF	Detected in the secreted fraction by proteomics. secreted protein function unknown, possibly involved in thiol:disulfide interchange. contains PS00013 prokaryotic membrane lipoprotein lipid attachment site, N-term signal pepitde sequence and PS00194 thioredoxin family active site.	G
NC_008611	MUL_4162	145	4634469	A	G	NON	I	V	1	conserved hypothetical RuvA-like protein	cytoplasmic protein	G
NC_008611	MUL_4162	957	4635281	C	G	NON	H	Q	1	conserved hypothetical RuvA-like protein	cytoplasmic protein	G
NC_008611	MUL_4186	817	4658769	G	A	NON	P	S	-1	conserved transmembrane protein rich in alanine, arginine and proline	Detected in the membrane fraction by proteomics (LC- MS/MS) membrane protein	A
NC_008611	MUL_4213	677	4686798	G	A	NON	T	I	-1	conserved hypothetical hydrolase	cytoplasmic protein	A
NC_008611	MUL_4213	622	4686853	T	C	NON	I	V	-1	conserved hypothetical hydrolase	cytoplasmic protein	C
NC_008611	MUL_4229	47	4702752	G	A	NON	A	V	-1	hypothetical protein	membrane protein	A
NC_008611	MUL_4230	504	4702922	A	G	SYN	G	G	-1	conserved hypothetical alanine-rich membrane protein	membrane protein	G
NC_008611	MUL_4230	182	4703244	G	C	NON	S	C	-1	conserved hypothetical alanine-rich membrane protein	membrane protein	C
NC_008611	MUL_4235	198	4708103	T	G	NON	Q	H	-1	hypothetical protein	cytoplasmic protein	G
NC_008611	MUL_4235	140	4708161	G	A	NON	A	V	-1	hypothetical protein	cytoplasmic protein	A
NC_008611	MUL_4247	345	4721039	C	T	SYN	Q	Q	-1	membrane-anchored thioredoxin-like protein	membrane protein function unknown, contains a N-term thioredoxin domain. may serve as a general protein disulphide oxidoreductase.	T
NC_008611	MUL_4270	372	4741338	G	T	SYN	G	G	1	formate-dependent nitrite reductase, membrane component, NrfD	membrane protein NrfD is an integral transmembrane protein with loops in both the periplasm and the cytoplasm. NrfD is thought to participate in the transfer of electrons, from the quinone pool into the terminal components of the Nrf pathway.
NC_008611	MUL_4270	382	4741348	T	C	SYN	L	L	1	formate-dependent nitrite reductase, membrane component, NrfD	membrane protein NrfD is an integral transmembrane protein with loops in both the periplasm and the cytoplasm. NrfD is thought to participate in the transfer of electrons, from the quinone pool into the terminal components of the Nrf pathway.
NC_008611	MUL_4270	396	4741362	A	G	SYN	R	R	1	formate-dependent nitrite reductase, membrane component, NrfD	membrane protein NrfD is an integral transmembrane protein with loops in both the periplasm and the cytoplasm. NrfD is thought to participate in the transfer of electrons, from the quinone pool into the terminal components of the Nrf pathway.
NC_008611	MUL_4272	153	4742683	G	A	SYN	A	A	1	hypothetical protein	Detected in the membrane fraction by proteomics (LC- MS/MS) membrane protein
NC_008611	MUL_4272	159	4742689	G	A	SYN	P	P	1	hypothetical protein	Detected in the membrane fraction by proteomics (LC- MS/MS) membrane protein
NC_008611	MUL_4272	198	4742728	T	A	SYN	P	P	1	hypothetical protein	Detected in the membrane fraction by proteomics (LC- MS/MS) membrane protein
NC_008611	MUL_4272	291	4742821	C	A	SYN	V	V	1	hypothetical protein	Detected in the membrane fraction by proteomics (LC- MS/MS) membrane protein	A
NC_008611	MUL_4278	202	4749199	C	G	NON	L	V	1	hypothetical protein	membrane protein function unknown, contains RDD domain RDD family. the molecular function of this region is unknown. however this region may be involved in transport of an as yet unknown set of ligands.
NC_008611	MUL_4279	597	4750570	G	A	SYN	E	E	1	PadR-like transcriptional regulatory protein	Detected in the cytoplasmic fraction by 2D-LC- MS/MS. cytoplasmic protein	A
NC_008611	MUL_4280	71	4750970	C	A	NON	A	E	1	PE-PGRS family protein	PE_PGRS9_2; membrane protein
NC_008611	MUL_4280	77	4750976	C	T	NON	T	I	1	PE-PGRS family protein	PE_PGRS9_2; membrane protein
NC_008611	MUL_4295	913	4767146	T	C	NON	N	D	-1	conserved hypothetical secreted protein	secreted protein	C
NC_008611	MUL_4295	902	4767157	G	A	NON	T	M	-1	conserved hypothetical secreted protein	secreted protein
NC_008611	MUL_4295	711	4767348	T	C	SYN	Q	Q	-1	conserved hypothetical secreted protein	secreted protein	C
NC_008611	MUL_4296	659	4768466	C	G	NON	W	S	-1	aspartate-semialdehyde dehydrogenase Asd	Detected in the cytoplasmic fraction by 2D-LC- MS/MS. cytoplasmic protein involved at the second step in the common biosynthetic pathway leading from asp to the cell wall precursor meso-diaminopimelate, to Lys, to Met, to Ile and to Thr [catalytic activity: l-aspartate-semialdehyde + orthophosphate + NADP(+) = L-aspartyl phosphate + NADPH]	G
NC_008611	MUL_4299	491	4775758	A	G	NON	I	T	-1	hypothetical protein	cytoplasmic protein	G
NC_008611	MUL_4303	815	4779922	A	G	NON	V	A	-1	DNA polymerase III (epsilon subunit) DnaQ	cytoplasmic protein DNA polymerase III is a complex, multichain enzyme responsible for most of the replicative synthesis in bacteria. the epsilon subunit contain the editing function and is a proofreading 3'-5' exonuclease [catalytic activity: N deoxynucleoside triphosphate = N diphosphate + {DNA}(N)]	G
NC_008611	MUL_4310	1171	4786503	G	C	NON	V	L	1	conserved hypothetical dehydrogenase	cytoplasmic protein	C
NC_008611	MUL_4310	1186	4786518	C	T	NON	P	S	1	conserved hypothetical dehydrogenase	cytoplasmic protein	T
NC_008611	MUL_4315	902	4790252	G	A	NON	A	V	-1	DNA polymerase III (subunit gamma/tau) DnaZX	cytoplasmic protein DNA polymerase III is a complex, multichain enzyme responsible for most of the replicative synthesis in bacteria. this DNA polymerase also exhibits 3' to 5' exonuclease activity [catalytic activity: N deoxynucleoside triphosphate = N pyrophosphate + DNA(N)]	A
NC_008611	MUL_4315	498	4790656	T	C	SYN	R	R	-1	DNA polymerase III (subunit gamma/tau) DnaZX	cytoplasmic protein DNA polymerase III is a complex, multichain enzyme responsible for most of the replicative synthesis in bacteria. this DNA polymerase also exhibits 3' to 5' exonuclease activity [catalytic activity: N deoxynucleoside triphosphate = N pyrophosphate + DNA(N)]	C
NC_008611	MUL_4316	762	4791737	G	A	SYN	F	F	-1	conserved transcriptional regulator	Detected in the cytoplasmic fraction by 2D-LC- MS/MS. Also detected in the extracellular matrix and the membrane fractions by proteomics. cytoplasmic protein	A
NC_008611	MUL_4316	281	4792218	C	T	NON	S	N	-1	conserved transcriptional regulator	Detected in the cytoplasmic fraction by 2D-LC- MS/MS. Also detected in the extracellular matrix and the membrane fractions by proteomics. cytoplasmic protein	T
NC_008611	MUL_4318	76	4793018	G	C	NON	V	L	1	hypothetical protein	Detected in the membrane fraction by proteomics (LC- MS/MS) membrane protein	C
NC_008611	MUL_4327	218	4802565	C	T	NON	S	L	1	cutinase, Cut5	secreted protein hydrolysis of cutin (a polyester that forms the structure of plant cuticle)	T
NC_008611	MUL_4327	232	4802579	A	G	NON	I	V	1	cutinase, Cut5	secreted protein hydrolysis of cutin (a polyester that forms the structure of plant cuticle)	G
NC_008611	MUL_4330	330	4804326	A	G	SYN	I	I	-1	hypothetical protein	Detected in the membrane fraction by proteomics (LC- MS/MS) membrane protein	G
NC_008611	MUL_4330	315	4804341	G	A	SYN	F	F	-1	hypothetical protein	Detected in the membrane fraction by proteomics (LC- MS/MS) membrane protein	A
NC_008611	MUL_4338	394	4813995	C	A	NON	E	*	-1	hypothetical protein	cytoplasmic protein	A
NC_008611	MUL_4338	172	4814217	T	C	NON	T	A	-1	hypothetical protein	cytoplasmic protein	C
NC_008611	MUL_4340	49	4815553	G	A	NON	V	I	1	ATP-dependent DNA ligase LigC	cytoplasmic protein this protein seals during DNA replication, DNA recombination and DNA repair nicks in double-stranded DNA [catalytic activity: ATP + (deoxyribonucleotide)(N) + (deoxyribonucleotide)(M) = AMP + pyrophosphate + (deoxyribonucleotide)(N+M)]	A
NC_008611	MUL_4340	218	4815722	G	A	NON	C	Y	1	ATP-dependent DNA ligase LigC	cytoplasmic protein this protein seals during DNA replication, DNA recombination and DNA repair nicks in double-stranded DNA [catalytic activity: ATP + (deoxyribonucleotide)(N) + (deoxyribonucleotide)(M) = AMP + pyrophosphate + (deoxyribonucleotide)(N+M)]	A
NC_008611	MUL_4340	240	4815744	G	A	SYN	V	V	1	ATP-dependent DNA ligase LigC	cytoplasmic protein this protein seals during DNA replication, DNA recombination and DNA repair nicks in double-stranded DNA [catalytic activity: ATP + (deoxyribonucleotide)(N) + (deoxyribonucleotide)(M) = AMP + pyrophosphate + (deoxyribonucleotide)(N+M)]	A
NC_008611	MUL_4340	583	4816087	C	A	NON	L	I	1	ATP-dependent DNA ligase LigC	cytoplasmic protein this protein seals during DNA replication, DNA recombination and DNA repair nicks in double-stranded DNA [catalytic activity: ATP + (deoxyribonucleotide)(N) + (deoxyribonucleotide)(M) = AMP + pyrophosphate + (deoxyribonucleotide)(N+M)]	A
NC_008611	MUL_4346	894	4821670	G	A	SYN	R	R	-1	multi-functional enzyme with acyl-CoA-reductase activity AcrA1_1	cytoplasmic protein function unknown, involved in cellular metabolism	A
NC_008611	MUL_4346	481	4822083	T	C	NON	T	A	-1	multi-functional enzyme with acyl-CoA-reductase activity AcrA1_1	cytoplasmic protein function unknown, involved in cellular metabolism	C
NC_008611	MUL_4346	50	4822514	G	A	NON	S	L	-1	multi-functional enzyme with acyl-CoA-reductase activity AcrA1_1	cytoplasmic protein function unknown, involved in cellular metabolism	A
NC_008611	MUL_4346	37	4822527	G	C	NON	R	G	-1	multi-functional enzyme with acyl-CoA-reductase activity AcrA1_1	cytoplasmic protein function unknown, involved in cellular metabolism	C
NC_008611	MUL_4347	533	4823281	G	A	NON	R	H	1	hypothetical protein	cytoplasmic protein	A
NC_008611	MUL_4348	78	4823795	T	C	SYN	V	V	1	hypothetical protein	membrane protein	C
NC_008611	MUL_4349	1429	4824501	T	C	NON	I	V	-1	long-chain-fatty-acid-CoA ligase FadD15_1	cytoplasmic protein function unknown, but involved in lipid degradation.	C
NC_008611	MUL_4350	775	4826963	C	T	NON	P	S	1	transcriptional regulatory protein (probably AraC/XylS-family)	cytoplasmic protein involved in transcriptional mechanism.	T
NC_008611	MUL_4360	109	4840257	A	G	NON	T	A	1	hypothetical protein	cytoplasmic protein
NC_008611	MUL_4360	158	4840306	G	A	NON	G	D	1	hypothetical protein	cytoplasmic protein	A
NC_008611	MUL_4367	1638	4847107	A	G	SYN	G	G	-1	PE-PGRS family protein	membrane protein
NC_008611	MUL_4367	1614	4847131	G	A	SYN	G	G	-1	PE-PGRS family protein	membrane protein
NC_008611	MUL_4367	1485	4847260	A	G	SYN	G	G	-1	PE-PGRS family protein	membrane protein
NC_008611	MUL_4367	1159	4847586	A	C	NON	S	A	-1	PE-PGRS family protein	membrane protein
NC_008611	MUL_4367	1093	4847652	A	G	NON	F	L	-1	PE-PGRS family protein	membrane protein
NC_008611	MUL_4378	22	4857008	T	C	NON	S	P	1	hypothetical protein	membrane protein	C
NC_008611	MUL_4380	234	4858946	C	T	SYN	E	E	-1	hypothetical protein	cytoplasmic protein	T
NC_008611	MUL_4381	673	4860260	C	G	NON	H	D	1	PE-PGRS family protein	secreted protein	G
NC_008611	MUL_4381	2173	4861760	C	G	NON	R	G	1	PE-PGRS family protein	secreted protein
NC_008611	MUL_4383	698	4864412	C	A	NON	A	E	1	hypothetical protein	cytoplasmic protein	A
NC_008611	MUL_4383	719	4864433	C	G	NON	S	R	1	hypothetical protein	cytoplasmic protein
NC_008611	MUL_4383	748	4864462	G	C	NON	G	R	1	hypothetical protein	cytoplasmic protein	C
NC_008611	MUL_4384	711	4865479	C	T	SYN	D	D	1	short-chain type dehydrogenase/reductase	cytoplasmic protein function unknown, possibly involved in cellular metabolism.	T
NC_008611	MUL_4387	19	4867476	G	A	NON	D	N	1	quinone oxidoreductase	membrane protein possibly binds NADP and acts through a one-electron transfer process. quinones are supposed to be the best substrates. may act in the detoxification of xenobiotics [catalytic activity: NADPH + quinone = NADP+ + semiquinone]	A
NC_008611	MUL_4387	167	4867624	C	T	NON	P	L	1	quinone oxidoreductase	membrane protein possibly binds NADP and acts through a one-electron transfer process. quinones are supposed to be the best substrates. may act in the detoxification of xenobiotics [catalytic activity: NADPH + quinone = NADP+ + semiquinone]
NC_008611	MUL_4387	230	4867687	T	C	NON	I	T	1	quinone oxidoreductase	membrane protein possibly binds NADP and acts through a one-electron transfer process. quinones are supposed to be the best substrates. may act in the detoxification of xenobiotics [catalytic activity: NADPH + quinone = NADP+ + semiquinone]	C
NC_008611	MUL_4388	1389	4868925	A	G	SYN	S	S	-1	hydrolase	cytoplasmic protein function unknown, probably involved in cellular metabolism.	G
NC_008611	MUL_4388	823	4869491	G	C	NON	L	V	-1	hydrolase	cytoplasmic protein function unknown, probably involved in cellular metabolism.	C
NC_008611	MUL_4391	426	4873016	A	G	SYN	D	D	-1	two component transcriptional regulatory protein TcrX	cytoplasmic protein sensor part of a two component regulatory system.	G
NC_008611	MUL_4391	66	4873376	G	C	NON	D	E	-1	two component transcriptional regulatory protein TcrX	cytoplasmic protein sensor part of a two component regulatory system.	C
NC_008611	MUL_4394	79	4876461	C	G	NON	V	L	-1	hypothetical protein	membrane protein	G
NC_008611	MUL_4399	1197	4880453	A	G	SYN	G	G	-1	PE-PGRS family protein	membrane protein
NC_008611	MUL_4399	1170	4880480	A	G	SYN	G	G	-1	PE-PGRS family protein	membrane protein
NC_008611	MUL_4399	995	4880655	G	C	NON	A	G	-1	PE-PGRS family protein	membrane protein
NC_008611	MUL_4399	811	4880839	A	G	NON	W	R	-1	PE-PGRS family protein	membrane protein
NC_008611	MUL_4399	729	4880921	G	C	SYN	A	A	-1	PE-PGRS family protein	membrane protein
NC_008611	MUL_4399	716	4880934	G	T	NON	T	N	-1	PE-PGRS family protein	membrane protein
NC_008611	MUL_4399	575	4881075	A	C	NON	F	C	-1	PE-PGRS family protein	membrane protein
NC_008611	MUL_4400	519	4882757	A	G	SYN	G	G	-1	PE-PGRS family protein	membrane protein	G
NC_008611	MUL_4400	491	4882785	G	C	NON	A	G	-1	PE-PGRS family protein	membrane protein
NC_008611	MUL_4400	254	4883022	C	T	NON	G	E	-1	PE-PGRS family protein	membrane protein	T
NC_008611	MUL_4400	216	4883060	G	C	NON	F	L	-1	PE-PGRS family protein	membrane protein	C
NC_008611	MUL_4402	733	4885037	G	C	NON	R	G	-1	O-methyltransferase	cytoplasmic protein function unknown, may play a role in secondary metabolites biosynthesis, transport, and catabolism.
NC_008611	MUL_4402	732	4885038	G	C	SYN	G	G	-1	O-methyltransferase	cytoplasmic protein function unknown, may play a role in secondary metabolites biosynthesis, transport, and catabolism.	T
NC_008611	MUL_4402	662	4885108	C	T	NON	G	E	-1	O-methyltransferase	cytoplasmic protein function unknown, may play a role in secondary metabolites biosynthesis, transport, and catabolism.	T
NC_008611	MUL_4407	99	4887759	C	G	SYN	V	V	1	histidinol-phosphate aminotransferase HisC2	cytoplasmic protein involved in histidine biosynthetic pathway (at the eighth step) [catalytic activity: L-histidinol-phosphate + 2-oxoglutarate = 3-(imidazol-4-yl)-2-oxopropyl phosphate + glutamate]	G
NC_008611	MUL_4407	222	4887882	T	C	SYN	S	S	1	histidinol-phosphate aminotransferase HisC2	cytoplasmic protein involved in histidine biosynthetic pathway (at the eighth step) [catalytic activity: L-histidinol-phosphate + 2-oxoglutarate = 3-(imidazol-4-yl)-2-oxopropyl phosphate + glutamate]	C
NC_008611	MUL_4408	6	4888748	T	C	SYN	N	N	1	hypothetical protein	cytoplasmic protein	C
NC_008611	MUL_4408	39	4888781	T	C	SYN	R	R	1	hypothetical protein	cytoplasmic protein	C
NC_008611	MUL_4410	243	4890078	T	C	SYN	A	A	1	Fusion of enoyl-CoA hydratase, EchA21 and lipase, LipE	Point mutation has removed stop codon and translationally coupled EchA21 with LipE Detected in the cytoplasmic fraction by 2D-LC- MS/MS. Also detected in the membrane fraction by proteomics (2D-LC-MS/MS) cytoplasmic protein function unknown, lipolytic enzyme probably involved in lipid metabolism.	C
NC_008611	MUL_4410	285	4890120	A	G	SYN	E	E	1	Fusion of enoyl-CoA hydratase, EchA21 and lipase, LipE	Point mutation has removed stop codon and translationally coupled EchA21 with LipE Detected in the cytoplasmic fraction by 2D-LC- MS/MS. Also detected in the membrane fraction by proteomics (2D-LC-MS/MS) cytoplasmic protein function unknown, lipolytic enzyme probably involved in lipid metabolism.	G
NC_008611	MUL_4410	823	4890658	C	T	NON	Q	*	1	Fusion of enoyl-CoA hydratase, EchA21 and lipase, LipE	Point mutation has removed stop codon and translationally coupled EchA21 with LipE Detected in the cytoplasmic fraction by 2D-LC- MS/MS. Also detected in the membrane fraction by proteomics (2D-LC-MS/MS) cytoplasmic protein function unknown, lipolytic enzyme probably involved in lipid metabolism.	T
NC_008611	MUL_4410	1471	4891306	C	G	NON	R	G	1	Fusion of enoyl-CoA hydratase, EchA21 and lipase, LipE	Point mutation has removed stop codon and translationally coupled EchA21 with LipE Detected in the cytoplasmic fraction by 2D-LC- MS/MS. Also detected in the membrane fraction by proteomics (2D-LC-MS/MS) cytoplasmic protein function unknown, lipolytic enzyme probably involved in lipid metabolism.	G
NC_008611	MUL_4417	357	4900272	G	C	SYN	V	V	-1	conserved secreted protein	Also detected in the membrane and the cytoplasmic fractions by proteomics secreted protein function unknown, possibly involved in cellular metabolism.	C
NC_008611	MUL_4417	351	4900278	T	C	SYN	A	A	-1	conserved secreted protein	Also detected in the membrane and the cytoplasmic fractions by proteomics secreted protein function unknown, possibly involved in cellular metabolism.	C
NC_008611	MUL_4417	112	4900517	C	T	NON	D	N	-1	conserved secreted protein	Also detected in the membrane and the cytoplasmic fractions by proteomics secreted protein function unknown, possibly involved in cellular metabolism.	T
NC_008611	MUL_4418	835	4900745	G	C	NON	H	D	-1	formamidopyrimidine-DNA glycosylase	Detected in the cytoplamic fraction by LCMSMS cytoplasmic protein this enzyme may play a significant role in processes leading to recovery from mutagenesis and/or cell death by alkylating agents [catalytic activity: hydrolysis of DNA containing ring-opened N7-methylguanine residues, releasing 2,6-diamino-4-hydroxy-5-(N- methyl)formamidopyrimide]	C
NC_008611	MUL_4424	498	4907613	G	A	SYN	L	L	1	hypothetical protein	membrane protein	A
NC_008611	MUL_4424	504	4907619	G	A	SYN	V	V	1	hypothetical protein	membrane protein
NC_008611	MUL_4424	844	4907959	T	C	NON	S	P	1	hypothetical protein	membrane protein	C
NC_008611	MUL_4424	874	4907989	T	C	SYN	L	L	1	hypothetical protein	membrane protein	C
NC_008611	MUL_4429	706	4911766	C	G	NON	E	Q	-1	enoyl-CoA hydratase, EchA12_2	cytoplasmic protein oxidizes fatty acids using specific components (by similarity) [catalytic activity: (3S)-3-hydroxyacyl-CoA = trans-2(or 3)-enoyl-CoA + H(2)O]	G
NC_008611	MUL_4430	554	4913147	G	T	NON	R	L	1	hypothetical protein	cytoplasmic protein	T
NC_008611	MUL_4435	624	4920266	C	G	NON	F	L	1	fructokinase, PfkB	membrane protein ATP + D-fructose = ADP + D-fructose 6-phosphate	G
NC_008611	MUL_4435	634	4920276	A	G	NON	S	G	1	fructokinase, PfkB	membrane protein ATP + D-fructose = ADP + D-fructose 6-phosphate	G
NC_008611	MUL_4437	257	4921931	C	T	NON	P	L	1	periplasmic phosphate-binding lipoprotein PstS2	Detected in the membrane fraction by proteomics. membrane protein involved in active transport of inorganic phosphate across the membrane (import) this is one of the proteins required for binding-protein-mediated phosphate transport.	T
NC_008611	MUL_4442	58	4928590	C	G	NON	R	G	1	short-chain type dehydrogenase/reductase	cytoplasmic protein function unknown, possibly involved in cellular metabolism.
NC_008611	MUL_4442	64	4928596	T	C	NON	F	L	1	short-chain type dehydrogenase/reductase	cytoplasmic protein function unknown, possibly involved in cellular metabolism.	C
NC_008611	MUL_4447	210	4933410	C	G	SYN	L	L	1	hypothetical protein	CDS appears to have been formed by a DNA deletion that fused the N-term of a conserved hypothetical protein with the C-term of a putative oxidoreductase (MON4219) cytoplasmic protein	G
NC_008611	MUL_4447	571	4933771	C	G	NON	R	G	1	hypothetical protein	CDS appears to have been formed by a DNA deletion that fused the N-term of a conserved hypothetical protein with the C-term of a putative oxidoreductase (MON4219) cytoplasmic protein
NC_008611	MUL_4447	584	4933784	T	C	NON	L	P	1	hypothetical protein	CDS appears to have been formed by a DNA deletion that fused the N-term of a conserved hypothetical protein with the C-term of a putative oxidoreductase (MON4219) cytoplasmic protein	C
NC_008611	MUL_4463	792	4947790	C	T	SYN	N	N	1	PPE family protein	membrane protein function unknown. possibly a protective antigen involved with the early control of infection.	T
NC_008611	MUL_4463	964	4947962	G	A	NON	V	I	1	PPE family protein	membrane protein function unknown. possibly a protective antigen involved with the early control of infection.	A
NC_008611	MUL_4463	981	4947979	C	G	SYN	V	V	1	PPE family protein	membrane protein function unknown. possibly a protective antigen involved with the early control of infection.	G
NC_008611	MUL_4463	1163	4948161	G	A	NON	S	N	1	PPE family protein	membrane protein function unknown. possibly a protective antigen involved with the early control of infection.	A
NC_008611	MUL_4463	1176	4948174	G	C	SYN	S	S	1	PPE family protein	membrane protein function unknown. possibly a protective antigen involved with the early control of infection.	C
NC_008611	MUL_4471	899	4958976	G	C	NON	C	S	1	anchored-membrane serine/threonine-protein kinase PknF	cytoplasmic protein involved in signal transduction (via phosphorylation) thought to be involved in membrane transport. phosphorylates the peptide substrate myelin basic protein (MBP) at serine and threonine residues [catalytic activity: ATP + a protein = ADP + a phosphoprotein]
NC_008611	MUL_4485	53	4971984	C	T	NON	A	V	1	oxidoreductase	cytoplasmic protein function unknown, probably involved in cellular metabolism	T
NC_008611	MUL_4489	812	4976652	C	T	NON	A	V	1	PE-PGRS family protein	membrane protein	T
NC_008611	MUL_4489	820	4976660	G	C	NON	G	R	1	PE-PGRS family protein	membrane protein	C
NC_008611	MUL_4489	1197	4977037	G	C	NON	K	N	1	PE-PGRS family protein	membrane protein
NC_008611	MUL_4489	1201	4977041	G	A	NON	G	S	1	PE-PGRS family protein	membrane protein	A
NC_008611	MUL_4492	1039	4978745	A	G	NON	W	R	-1	integral membrane acyltransferase	membrane protein catalyzes the acylation of the mycaminose sugar during midecamycin biosynthesis	G
NC_008611	MUL_4494	122	4981783	T	C	NON	V	A	1	lipoprotein LprE	membrane protein	C
NC_008611	MUL_4495	140	4982480	T	C	NON	V	A	1	hypothetical protein	cytoplasmic protein	C
NC_008611	MUL_4495	245	4982585	T	C	NON	V	A	1	hypothetical protein	cytoplasmic protein	C
NC_008611	MUL_4495	515	4982855	C	T	NON	A	V	1	hypothetical protein	cytoplasmic protein
NC_008611	MUL_4495	865	4983205	G	A	NON	A	T	1	hypothetical protein	cytoplasmic protein	A
NC_008611	MUL_4495	1163	4983503	A	C	NON	K	T	1	hypothetical protein	cytoplasmic protein	C
NC_008611	MUL_4495	1858	4984198	C	G	NON	Q	E	1	hypothetical protein	cytoplasmic protein	G
NC_008611	MUL_4495	2130	4984470	G	C	SYN	A	A	1	hypothetical protein	cytoplasmic protein
NC_008611	MUL_4495	2500	4984840	A	G	NON	S	G	1	hypothetical protein	cytoplasmic protein	G
NC_008611	MUL_4507	1015	5000840	G	T	NON	H	N	-1	F420-dependent glucose-6-phosphate dehydrogenase Fgd2	cytoplasmic protein catalyzes oxidation of glucose-6-phosphate to 6- phosphogluconolactone using coenzyme F420 (an *-hydroxy-5- deazaflavin derivative) as the electron acceptor.	T
NC_008611	MUL_4507	331	5001524	C	G	NON	V	L	-1	F420-dependent glucose-6-phosphate dehydrogenase Fgd2	cytoplasmic protein catalyzes oxidation of glucose-6-phosphate to 6- phosphogluconolactone using coenzyme F420 (an *-hydroxy-5- deazaflavin derivative) as the electron acceptor.	G
NC_008611	MUL_4507	101	5001754	G	A	NON	T	I	-1	F420-dependent glucose-6-phosphate dehydrogenase Fgd2	cytoplasmic protein catalyzes oxidation of glucose-6-phosphate to 6- phosphogluconolactone using coenzyme F420 (an *-hydroxy-5- deazaflavin derivative) as the electron acceptor.	A
NC_008611	MUL_4509	547	5003848	G	A	NON	H	Y	-1	hypothetical protein	membrane protein	A
NC_008611	MUL_4509	532	5003863	A	C	NON	Y	D	-1	hypothetical protein	membrane protein	C
NC_008611	MUL_4509	492	5003903	T	G	SYN	G	G	-1	hypothetical protein	membrane protein	G
NC_008611	MUL_4509	160	5004235	G	A	NON	P	S	-1	hypothetical protein	membrane protein	A
NC_008611	MUL_4509	93	5004302	C	G	NON	L	F	-1	hypothetical protein	membrane protein	G
NC_008611	MUL_4543	36	5044655	C	G	NON	I	M	1	iron-regulated heparin binding hemagglutinin HbhA	Also detected in the cytoplasmic fraction y proteomics membrane protein required for extrapulmonary dissemination. mediates adherence to epithelial cells by binding to sulfated glycoconjugates present at the surface of these cells; binds heparin, dextran sulfate, fucoidan and chondroitin sulfate. promotes hemagglutination of erythrocytes of certain host species. induces mycobacterial aggregation.	G
NC_008611	MUL_4552	340	5051343	A	G	NON	T	A	1	UDP-N-acetylenolpyruvoylglucosamine reductase MurB	cytoplasmic protein involved in cell wall formation; peptidoglycan biosynthesis [catalytic activity: UDP-N-acetylmuramate + NADP+ = UDP-N-acetyl-3-O-(1-carboxyvinyl)-D-glucosamine + NADPH]
NC_008611	MUL_4552	342	5051345	C	G	NON	T	A	1	UDP-N-acetylenolpyruvoylglucosamine reductase MurB	cytoplasmic protein involved in cell wall formation; peptidoglycan biosynthesis [catalytic activity: UDP-N-acetylmuramate + NADP+ = UDP-N-acetyl-3-O-(1-carboxyvinyl)-D-glucosamine + NADPH]	G
NC_008611	MUL_4555	166	5054673	T	C	NON	W	R	1	transcriptional regulatory protein	cytoplasmic protein possibly involved in transcriptional mechanism.	C
NC_008611	MUL_4555	831	5055338	T	C	SYN	T	T	1	transcriptional regulatory protein	cytoplasmic protein possibly involved in transcriptional mechanism.	C
NC_008611	MUL_4555	856	5055363	A	G	NON	I	V	1	transcriptional regulatory protein	cytoplasmic protein possibly involved in transcriptional mechanism.	G
NC_008611	MUL_4555	906	5055413	A	G	SYN	Q	Q	1	transcriptional regulatory protein	cytoplasmic protein possibly involved in transcriptional mechanism.	G
NC_008611	MUL_4570	721	5070090	T	G	NON	L	V	1	pyrroline-5-carboxylate reductase ProC	Detected in the cytoplasmic fraction by 2D-LC- MS/MS. membrane protein involved at the terminal (third) step in proline biosynthesis [catalytic activity: L-proline + NAD(P)+ = 1- pyrroline-5-carboxylate + NAD(P)H]	G
NC_008611	MUL_4591	235	5091589	G	A	NON	D	N	1	hypothetical protein	cytoplasmic protein
NC_008611	MUL_4591	284	5091638	T	C	NON	V	A	1	hypothetical protein	cytoplasmic protein
NC_008611	MUL_4591	286	5091640	G	C	NON	E	Q	1	hypothetical protein	cytoplasmic protein
NC_008611	MUL_4591	307	5091661	G	T	NON	D	Y	1	hypothetical protein	cytoplasmic protein	T
NC_008611	MUL_4598	40	5098336	C	T	NON	P	S	1	glutamyl-tRNA reductase HemA	cytoplasmic protein involved in porphyrin biosynthesis by the C5 pathway (at the first step) [catalytic activity: glutamyl- tRNA(Glu) + NADPH = glutamate-1-semialdehyde + NADP+ + tRNA(Glu)]	T
NC_008611	MUL_4599	382	5100113	T	C	NON	F	L	1	porphobilinogen deaminase HemC	Detected in the cytoplasmic fraction by 2D-LC- MS/MS cytoplasmic protein involved in porphyrin biosynthesis by the C5 pathway (at the fourth step) tetrapolymerization of the monopyrrole PBG into the hydroxymethylbilane preuroporphyrinogen in several discrete steps [catalytic activity: 4 porphobilinogen + H2O = hydroxymethylbilane + 4 NH3]	C
NC_008611	MUL_4600	249	5100949	C	T	SYN	G	G	1	uroporphyrin-III C-methyltransferase HemD	cytoplasmic protein possibly involved in the biosynthesis of siroheme and cobalamin [catalytic activity: 2 S-adenosyl-L- methionine + uroporphyrin III = 2 S-adenosyl-L- homocysteine + sirohydrochlorin]	T
NC_008611	MUL_4601	78	5102491	A	C	SYN	S	S	1	delta-aminolevulinic acid dehydratase HemB	cytoplasmic protein involved in porphyrin and HemE biosynthesis (at the second step) [catalytic activity: 2 5-aminolevulinate = porphobilinogen + 2 H2O]	C
NC_008611	MUL_4601	100	5102513	T	C	SYN	L	L	1	delta-aminolevulinic acid dehydratase HemB	cytoplasmic protein involved in porphyrin and HemE biosynthesis (at the second step) [catalytic activity: 2 5-aminolevulinate = porphobilinogen + 2 H2O]	C
NC_008611	MUL_4615	357	5117003	T	G	NON	D	E	1	hypothetical protein	membrane protein	G
NC_008611	MUL_4617	1269	5118439	G	A	SYN	V	V	-1	hypothetical protein	membrane protein	A
NC_008611	MUL_4617	1147	5118561	T	C	NON	T	A	-1	hypothetical protein	membrane protein	C
NC_008611	MUL_4621	618	5121812	G	A	SYN	L	L	1	PPE family protein	PPE15; membrane protein	A
NC_008611	MUL_4621	738	5121932	C	T	SYN	I	I	1	PPE family protein	PPE15; membrane protein	T
NC_008611	MUL_4625	1158	5125375	A	G	SYN	V	V	1	two component sensor histidine kinase TrcS	membrane protein sensor part of the two component regulatory system TrcS/TrcR.	G
NC_008611	MUL_4628	795	5127090	G	C	NON	I	V	-1	hypothetical protein	cytoplasmic protein function unknown; identity to GppA, exopolyphosphatase [nucleotide transport and metabolism / inorganic ion transport and metabolism]
NC_008611	MUL_4628	579	5127306	G	A	SYN	A	A	-1	hypothetical protein	cytoplasmic protein function unknown; identity to GppA, exopolyphosphatase [nucleotide transport and metabolism / inorganic ion transport and metabolism]	A
NC_008611	MUL_4631	687	5129764	G	A	SYN	G	G	-1	enolase Eno	Also detected in the extracellular matrix and the membrane fraction by proteomics. cytoplasmic protein glycolysis [catalytic activity:2-phospho-D- glycerate = phosphoenolpyruvate + H(2)O]	A
NC_008611	MUL_4631	300	5130151	G	A	SYN	P	P	-1	enolase Eno	Also detected in the extracellular matrix and the membrane fraction by proteomics. cytoplasmic protein glycolysis [catalytic activity:2-phospho-D- glycerate = phosphoenolpyruvate + H(2)O]	A
NC_008611	MUL_4638	622	5139731	G	A	NON	V	M	1	ribose-phosphate pyrophosphokinase PrsA	Also detected in the membrane fraction by proteomics (LC-MS/MS) cytoplasmic protein catalyzes the formation of PRPP from ATP and ribose 5-phosphate. PRPP is then used in various biosynthetic pathways, as for example in the formation of purines, pyrimidines, histidine and tryptophan. [catalytic activity: ATP + D-ribose 5-phosphate = AMP + 5-phospho- alpha-D-ribose 1-diphosphate]	A
NC_008611	MUL_4638	645	5139754	T	C	SYN	N	N	1	ribose-phosphate pyrophosphokinase PrsA	Also detected in the membrane fraction by proteomics (LC-MS/MS) cytoplasmic protein catalyzes the formation of PRPP from ATP and ribose 5-phosphate. PRPP is then used in various biosynthetic pathways, as for example in the formation of purines, pyrimidines, histidine and tryptophan. [catalytic activity: ATP + D-ribose 5-phosphate = AMP + 5-phospho- alpha-D-ribose 1-diphosphate]	C
NC_008611	MUL_4643	615	5144212	G	C	NON	E	D	1	50S ribosomal protein L25 RplY	Detected in the cytoplasmic fraction by 2D-LC- MS/MS. cytoplasmic protein binds to the 50S rRNA
NC_008611	MUL_4643	625	5144222	C	G	NON	P	A	1	50S ribosomal protein L25 RplY	Detected in the cytoplasmic fraction by 2D-LC- MS/MS. cytoplasmic protein binds to the 50S rRNA	G
NC_008611	MUL_4648	1251	5147997	G	C	NON	D	E	-1	polyketide synthase Pks16	cytoplasmic protein potentially involved in some intermediate steps for the synthesis of a polyketide molecule which may be involved in secondary metabolism. probably not a polyketide but a acyl-CoA synthetase or fatty acyl AMP ligase	C
NC_008611	MUL_4648	879	5148369	A	G	SYN	V	V	-1	polyketide synthase Pks16	cytoplasmic protein potentially involved in some intermediate steps for the synthesis of a polyketide molecule which may be involved in secondary metabolism. probably not a polyketide but a acyl-CoA synthetase or fatty acyl AMP ligase	G
NC_008611	MUL_4648	412	5148836	A	G	SYN	L	L	-1	polyketide synthase Pks16	cytoplasmic protein potentially involved in some intermediate steps for the synthesis of a polyketide molecule which may be involved in secondary metabolism. probably not a polyketide but a acyl-CoA synthetase or fatty acyl AMP ligase	G
NC_008611	MUL_4650	420	5151039	C	T	SYN	K	K	-1	dimethyladenosine transferase KsgA	Detected in the membrane fraction by proteomics (LC- MS/MS) cytoplasmic protein specifically dimethylates two adjacent adenosines in the loop of a conserved hairpin near the 3'-end of 16S rRNA in the 30S particle. its inactivation leads to kasugamycin resistance	T
NC_008611	MUL_4650	29	5151430	G	A	NON	T	I	-1	dimethyladenosine transferase KsgA	Detected in the membrane fraction by proteomics (LC- MS/MS) cytoplasmic protein specifically dimethylates two adjacent adenosines in the loop of a conserved hairpin near the 3'-end of 16S rRNA in the 30S particle. its inactivation leads to kasugamycin resistance	A
NC_008611	MUL_4651	852	5151800	C	G	SYN	V	V	-1	resuscitation-promoting factor RpfB	secreted protein thought to promote the resuscitation and growth of dormant, nongrowing cell. could also stimulates the growth of several other high G+C Gram+ organisms, E.G. mycobacterium avium, mycobacterium bovis (BCG), mycobacterium kansasii, mycobacterium smegmatis.	G
NC_008611	MUL_4651	657	5151995	G	A	SYN	N	N	-1	resuscitation-promoting factor RpfB	secreted protein thought to promote the resuscitation and growth of dormant, nongrowing cell. could also stimulates the growth of several other high G+C Gram+ organisms, E.G. mycobacterium avium, mycobacterium bovis (BCG), mycobacterium kansasii, mycobacterium smegmatis.	A
NC_008611	MUL_4653	753	5152891	C	G	NON	R	S	-1	deoxyribonuclease TatD	membrane protein DNAse involved in proteins export. this sec- independent pathway is termed tat for twin-arginine translocation system. this system mainly transports proteins with bound cofactors that require folding prior to export (by similarity)	G
NC_008611	MUL_4655	310	5155892	A	G	NON	S	G	1	serine acetyltransferase CysE_1	cytoplasmic protein involved in cysteine biosynthesis [catalytic activity: acetyl-CoA + L-serine = CoA + O-acetyl-L- serine]	G
NC_008611	MUL_4655	342	5155924	G	A	SYN	T	T	1	serine acetyltransferase CysE_1	cytoplasmic protein involved in cysteine biosynthesis [catalytic activity: acetyl-CoA + L-serine = CoA + O-acetyl-L- serine]	A
NC_008611	MUL_4660	291	5160859	C	T	SYN	Y	Y	1	para-aminobenzoate synthase component, PabD	membrane protein catalyzes the biosynthesis of 4-amino-4- deoxychorismate (adc) from chorismate and glutamine	T
NC_008611	MUL_4660	1253	5161821	A	T	NON	Q	L	1	para-aminobenzoate synthase component, PabD	membrane protein catalyzes the biosynthesis of 4-amino-4- deoxychorismate (adc) from chorismate and glutamine	T
NC_008611	MUL_4665	241	5167283	A	G	NON	K	E	1	hypothetical protein	cytoplasmic protein	G
NC_008611	MUL_4666	338	5168002	G	A	NON	T	I	-1	conserved hypothetical secreted protein	secreted protein	A
NC_008611	MUL_5094	393	5168652	T	C	SYN	E	E	-1	conserved hypothetical secreted protein	secreted protein	C
NC_008611	MUL_4667	590	5169528	C	T	NON	R	H	-1	hypothetical protein	cytoplasmic protein	T
NC_008611	MUL_4667	357	5169761	A	G	SYN	D	D	-1	hypothetical protein	cytoplasmic protein	G
NC_008611	MUL_4668	218	5170499	C	G	NON	A	G	1	methyltransferase	cytoplasmic protein thought to cause methylation.	G
NC_008611	MUL_4668	537	5170818	G	A	SYN	L	L	1	methyltransferase	cytoplasmic protein thought to cause methylation.	A
NC_008611	MUL_4668	549	5170830	A	C	SYN	G	G	1	methyltransferase	cytoplasmic protein thought to cause methylation.	C
NC_008611	MUL_4672	164	5173309	G	A	NON	S	N	1	PPE family protein	membrane protein	A
NC_008611	MUL_4672	533	5173678	T	C	NON	V	A	1	PPE family protein	membrane protein	C
NC_008611	MUL_4673	287	5174829	A	T	NON	E	V	1	teichoic acid biosynthesis protein	cytoplasmic protein function unknown, possibly involved in cell envelope biogenesis, outer membrane
NC_008611	MUL_4674	899	5176288	T	C	NON	L	S	1	hypothetical protein	membrane protein function unknown, possibly involved in lipopolysaccharide synthesis.	C
NC_008611	MUL_4674	1072	5176461	C	T	SYN	L	L	1	hypothetical protein	membrane protein function unknown, possibly involved in lipopolysaccharide synthesis.	T
NC_008611	MUL_4674	1277	5176666	T	G	NON	L	R	1	hypothetical protein	membrane protein function unknown, possibly involved in lipopolysaccharide synthesis.	G
NC_008611	MUL_4674	1448	5176837	G	A	NON	G	D	1	hypothetical protein	membrane protein function unknown, possibly involved in lipopolysaccharide synthesis.	A
NC_008611	MUL_4678	787	5181604	G	A	NON	L	F	-1	hypothetical protein	cytoplasmic protein	A
NC_008611	MUL_4679	414	5183991	G	A	SYN	V	V	-1	hypothetical protein	Detected in the membrane fraction by proteomics (LC- MS/MS) membrane protein	A
NC_008611	MUL_4679	10	5184395	T	C	NON	T	A	-1	hypothetical protein	Detected in the membrane fraction by proteomics (LC- MS/MS) membrane protein	C
NC_008611	MUL_4682	442	5186902	C	T	NON	V	I	-1	hypothetical protein	cytoplasmic protein	T
NC_008611	MUL_4682	256	5187088	C	A	NON	E	*	-1	hypothetical protein	cytoplasmic protein	A
NC_008611	MUL_4686	1161	5190525	C	G	NON	L	F	-1	hypothetical protein	membrane protein	G
NC_008611	MUL_4686	845	5190841	G	C	NON	P	R	-1	hypothetical protein	membrane protein	C
NC_008611	MUL_4686	11	5191675	C	T	NON	C	Y	-1	hypothetical protein	membrane protein
NC_008611	MUL_4690	695	5194903	C	T	NON	G	D	-1	hypothetical protein	membrane protein	T
NC_008611	MUL_4692	654	5197117	G	A	SYN	Y	Y	-1	molybdopterin biosynthesis protein MoeA1	cytoplasmic protein involved in molybdenum cofactor biosynthesis: involved in the biosynthesis of a demolybdo-cofactor (molybdopterin), necessary for molybdo-enzymes.	A
NC_008611	MUL_4692	627	5197144	A	G	SYN	S	S	-1	molybdopterin biosynthesis protein MoeA1	cytoplasmic protein involved in molybdenum cofactor biosynthesis: involved in the biosynthesis of a demolybdo-cofactor (molybdopterin), necessary for molybdo-enzymes.	G
NC_008611	MUL_4694	178	5198994	C	A	NON	P	T	1	hypothetical protein	cytoplasmic protein	A
NC_008611	MUL_4694	201	5199017	A	G	SYN	Q	Q	1	hypothetical protein	cytoplasmic protein	G
NC_008611	MUL_4695	307	5199791	A	G	NON	T	A	1	conserved hypothetical serine rich protein	cytoplasmic protein	G
NC_008611	MUL_4696	260	5200146	G	C	NON	G	A	1	hypothetical protein	membrane protein
NC_008611	MUL_4696	262	5200148	C	T	NON	P	S	1	hypothetical protein	membrane protein	T
NC_008611	MUL_4708	132	5213932	G	A	SYN	A	A	1	enoyl-CoA hydratase EchA7	cytoplasmic protein oxidizes fatty acids using specific components [catalytic activity: (3S)-3-hydroxyacyl-CoA = trans-2(or 3)-enoyl-CoA + H(2)O]	A
NC_008611	MUL_4708	349	5214149	A	G	NON	S	G	1	enoyl-CoA hydratase EchA7	cytoplasmic protein oxidizes fatty acids using specific components [catalytic activity: (3S)-3-hydroxyacyl-CoA = trans-2(or 3)-enoyl-CoA + H(2)O]	G
NC_008611	MUL_4717	1392	5224948	G	A	SYN	A	A	-1	thiolase	cytoplasmic protein function unknown, but supposed involvement in lipid metabolism.
NC_008611	MUL_4717	1376	5224964	A	G	NON	V	A	-1	thiolase	cytoplasmic protein function unknown, but supposed involvement in lipid metabolism.	G
NC_008611	MUL_4717	60	5226280	C	G	NON	M	I	-1	thiolase	cytoplasmic protein function unknown, but supposed involvement in lipid metabolism.	G
NC_008611	MUL_4719	165	5228616	A	G	SYN	G	G	-1	succinyl-CoA synthetase (alpha chain) SucD	Detected in the cytoplasmic and the extracellular mtrix fractions by proteomics. extracellular matrix protein involved in tricarboxylic acid cycle [catalytic activity: ATP + succinate + CoA = ADP + succinyl-CoA + phosphate]	G
NC_008611	MUL_4720	561	5229399	A	C	SYN	L	L	-1	succinyl-CoA synthetase (beta chain) SucC	Non-secretory protein cytoplasmic protein involved in tricarboxylic acid cycle [catalytic activity: ATP + succinate + CoA = ADP + succinyl-CoA + phosphate]	C
NC_008611	MUL_4721	386	5230620	T	C	NON	V	A	1	hypothetical protein	cytoplasmic protein
NC_008611	MUL_4723	2046	5232224	A	G	SYN	R	R	-1	ATP-dependent DNA helicase II UvrD1	cytoplasmic protein involved in nucleotide excision repair. has a 3'-5' helicase activity in presence of ATP. preferred substrate being one with both single and double stranded regions of DNA.	G
NC_008611	MUL_4723	1880	5232390	G	T	NON	T	N	-1	ATP-dependent DNA helicase II UvrD1	cytoplasmic protein involved in nucleotide excision repair. has a 3'-5' helicase activity in presence of ATP. preferred substrate being one with both single and double stranded regions of DNA.	T
NC_008611	MUL_4723	1106	5233164	C	T	NON	S	N	-1	ATP-dependent DNA helicase II UvrD1	cytoplasmic protein involved in nucleotide excision repair. has a 3'-5' helicase activity in presence of ATP. preferred substrate being one with both single and double stranded regions of DNA.	T
NC_008611	MUL_4723	445	5233825	T	C	NON	T	A	-1	ATP-dependent DNA helicase II UvrD1	cytoplasmic protein involved in nucleotide excision repair. has a 3'-5' helicase activity in presence of ATP. preferred substrate being one with both single and double stranded regions of DNA.	C
NC_008611	MUL_4723	16	5234254	T	G	NON	T	P	-1	ATP-dependent DNA helicase II UvrD1	cytoplasmic protein involved in nucleotide excision repair. has a 3'-5' helicase activity in presence of ATP. preferred substrate being one with both single and double stranded regions of DNA.
NC_008611	MUL_4742	222	5249811	A	G	SYN	P	P	-1	hypothetical protein	Detected in the membrane fraction by proteomics (LC- MS/MS) membrane protein	G
NC_008611	MUL_4753	1789	5269105	A	G	SYN	L	L	-1	serine/threonine-protein kinase transcriptional regulatory protein PknK_3	membrane protein involved in signal transduction (via phosphorylation) involved in transcriptional regulatory mechanism and in the regulation of secondary metabolites [catalytic activity: ATP + a protein = ADP + a phosphoprotein]	G
NC_008611	MUL_4753	1773	5269121	G	A	SYN	D	D	-1	serine/threonine-protein kinase transcriptional regulatory protein PknK_3	membrane protein involved in signal transduction (via phosphorylation) involved in transcriptional regulatory mechanism and in the regulation of secondary metabolites [catalytic activity: ATP + a protein = ADP + a phosphoprotein]	A
NC_008611	MUL_4753	564	5270330	A	G	SYN	G	G	-1	serine/threonine-protein kinase transcriptional regulatory protein PknK_3	membrane protein involved in signal transduction (via phosphorylation) involved in transcriptional regulatory mechanism and in the regulation of secondary metabolites [catalytic activity: ATP + a protein = ADP + a phosphoprotein]	G
NC_008611	MUL_4775	183	5291266	G	A	SYN	Q	Q	1	transcriptional regulatory protein	cytoplasmic protein could be involved in transcriptional mechanism.	A
NC_008611	MUL_4778	575	5293377	T	G	NON	D	A	-1	epoxide hydrolase EphF	Detected in the membrane fraction by proteomics (LC- MS/MS) membrane protein thought to be involved in detoxification reactions following oxidative damage to lipids [catalytic activity: an epoxide + H(2)O = a glycol]	G
NC_008611	MUL_4785	408	5299537	G	T	NON	H	Q	-1	linoleoyl-CoA desaturase, DesA3_2	membrane protein thought to be involved in lipid metabolism [catalytic activity: linoleoyl-CoA + ah(2) + O(2) = gamma- linolenoyl-CoA + a + 2 H(2)O]
NC_008611	MUL_4789	465	5304154	C	G	SYN	A	A	-1	acetyltransferase	cytoplasmic protein function unknown, probably involved in cellular metabolism.	G
NC_008611	MUL_4812	591	5330659	C	G	SYN	S	S	-1	short-chain type dehydrogenase/reductase	cytoplasmic protein function unknown, possibly involved in cellular metabolism.	G
NC_008611	MUL_4812	331	5330919	T	C	NON	K	E	-1	short-chain type dehydrogenase/reductase	cytoplasmic protein function unknown, possibly involved in cellular metabolism.	C
NC_008611	MUL_4812	107	5331143	G	A	NON	A	V	-1	short-chain type dehydrogenase/reductase	cytoplasmic protein function unknown, possibly involved in cellular metabolism.	A
NC_008611	MUL_4820	61	5340809	T	C	NON	F	L	1	short-chain type dehydrogenase/reductase	cytoplasmic protein function unknown, possibly involved in cellular metabolism.	C
NC_008611	MUL_4820	95	5340843	C	G	NON	A	G	1	short-chain type dehydrogenase/reductase	cytoplasmic protein function unknown, possibly involved in cellular metabolism.
NC_008611	MUL_4820	260	5341008	A	T	NON	E	V	1	short-chain type dehydrogenase/reductase	cytoplasmic protein function unknown, possibly involved in cellular metabolism.	T
NC_008611	MUL_4820	274	5341022	T	C	NON	S	P	1	short-chain type dehydrogenase/reductase	cytoplasmic protein function unknown, possibly involved in cellular metabolism.	C
NC_008611	MUL_4820	585	5341333	A	G	SYN	R	R	1	short-chain type dehydrogenase/reductase	cytoplasmic protein function unknown, possibly involved in cellular metabolism.
NC_008611	MUL_4820	603	5341351	C	G	NON	I	M	1	short-chain type dehydrogenase/reductase	cytoplasmic protein function unknown, possibly involved in cellular metabolism.	G
NC_008611	MUL_4847	1308	5370077	G	A	SYN	H	H	-1	conserved integral membrane protein	membrane protein	A
NC_008611	MUL_4848	610	5372158	C	T	NON	R	W	1	conserved hypothetical secreted protein	secreted protein	T
NC_008611	MUL_4848	617	5372165	C	T	NON	A	V	1	conserved hypothetical secreted protein	secreted protein	T
NC_008611	MUL_4850	184	5373190	G	A	NON	A	T	1	cation transporter p-type ATPase a CtpA	membrane protein cation-transporting ATPase; possibly catalyzes the transport of a cation (possibly copper) with the hydrolyse of ATP [catalytic activity: ATP + H(2)O + cation(in) = ADP + phosphate + cation(out)]	A
NC_008611	MUL_4850	376	5373382	G	A	NON	V	M	1	cation transporter p-type ATPase a CtpA	membrane protein cation-transporting ATPase; possibly catalyzes the transport of a cation (possibly copper) with the hydrolyse of ATP [catalytic activity: ATP + H(2)O + cation(in) = ADP + phosphate + cation(out)]	A
NC_008611	MUL_4850	504	5373510	C	G	SYN	S	S	1	cation transporter p-type ATPase a CtpA	membrane protein cation-transporting ATPase; possibly catalyzes the transport of a cation (possibly copper) with the hydrolyse of ATP [catalytic activity: ATP + H(2)O + cation(in) = ADP + phosphate + cation(out)]	G
NC_008611	MUL_4850	1650	5374656	A	G	SYN	L	L	1	cation transporter p-type ATPase a CtpA	membrane protein cation-transporting ATPase; possibly catalyzes the transport of a cation (possibly copper) with the hydrolyse of ATP [catalytic activity: ATP + H(2)O + cation(in) = ADP + phosphate + cation(out)]	G
NC_008611	MUL_4850	1685	5374691	G	C	NON	G	A	1	cation transporter p-type ATPase a CtpA	membrane protein cation-transporting ATPase; possibly catalyzes the transport of a cation (possibly copper) with the hydrolyse of ATP [catalytic activity: ATP + H(2)O + cation(in) = ADP + phosphate + cation(out)]	C
NC_008611	MUL_4852	745	5376191	C	G	NON	V	L	-1	O-methyltransferase Omt_1	cytoplasmic protein function unknown, but supposed involved in lipid metabolism	G
NC_008611	MUL_4852	328	5376608	C	T	NON	A	T	-1	O-methyltransferase Omt_1	cytoplasmic protein function unknown, but supposed involved in lipid metabolism	T
NC_008611	MUL_4862	549	5391383	T	G	SYN	L	L	-1	bifunctional Mta/Sah nucleosidase Mtn	cytoplasmic protein responsible for cleavage of the glycosidic bond in both 5'-methylthioadenosine (MTA) and s- adenosylhomocysteine (sah) [catalytic activity 1: methylthioadenosine + H2O = adenine + 5-methylthio-D- ribose] [catalytic activity 2: S-adenosyl-L-homocysteine + H2O = adenine + S-D-ribosyl-L-homocysteine]	G
NC_008611	MUL_4862	542	5391390	T	C	NON	D	G	-1	bifunctional Mta/Sah nucleosidase Mtn	cytoplasmic protein responsible for cleavage of the glycosidic bond in both 5'-methylthioadenosine (MTA) and s- adenosylhomocysteine (sah) [catalytic activity 1: methylthioadenosine + H2O = adenine + 5-methylthio-D- ribose] [catalytic activity 2: S-adenosyl-L-homocysteine + H2O = adenine + S-D-ribosyl-L-homocysteine]	C
NC_008611	MUL_4865	503	5393896	G	A	NON	A	V	-1	short-chain type dehydrogenase/reductase	cytoplasmic protein function unknown, possibly involved in cellular metabolism.	A
NC_008611	MUL_4866	355	5394822	G	T	NON	V	L	1	hypothetical protein	cytoplasmic protein	T
NC_008611	MUL_4867	654	5395224	C	G	SYN	V	V	-1	hypothetical protein	membrane protein	G
NC_008611	MUL_4884	747	5412794	G	C	SYN	G	G	-1	dioxygenase	membrane protein function unknown, involved in cellular metabolism.	C
NC_008611	MUL_4884	381	5413160	G	A	SYN	R	R	-1	dioxygenase	membrane protein function unknown, involved in cellular metabolism.	A
NC_008611	MUL_4884	125	5413416	G	A	NON	A	V	-1	dioxygenase	membrane protein function unknown, involved in cellular metabolism.	A
NC_008611	MUL_4885	308	5413907	A	G	NON	D	G	1	hypothetical protein	cytoplasmic protein	G
NC_008611	MUL_4885	765	5414364	A	C	SYN	L	L	1	hypothetical protein	cytoplasmic protein	C
NC_008611	MUL_4888	70	5416490	T	C	NON	I	V	-1	hypothetical protein	cytoplasmic protein
NC_008611	MUL_4892	107	5419382	A	G	NON	V	A	-1	transcriptional regulatory protein (probably TetR-family)	cytoplasmic protein involved in transcriptional mechanism.	G
NC_008611	MUL_4893	483	5420105	G	C	SYN	L	L	1	hypothetical protein	cytoplasmic protein	C
NC_008611	MUL_4893	783	5420405	G	C	SYN	A	A	1	hypothetical protein	cytoplasmic protein	C
NC_008611	MUL_4899	486	5426891	C	T	SYN	H	H	1	hypothetical protein	cytoplasmic protein	T
NC_008611	MUL_4900	1297	5427339	C	T	NON	A	T	-1	flavoprotein	membrane protein function unknown, probably involved in cellular metabolism	T
NC_008611	MUL_4900	1245	5427391	T	A	NON	E	D	-1	flavoprotein	membrane protein function unknown, probably involved in cellular metabolism	A
NC_008611	MUL_4900	67	5428569	T	C	NON	T	A	-1	flavoprotein	membrane protein function unknown, probably involved in cellular metabolism	C
NC_008611	MUL_4900	50	5428586	A	G	NON	V	A	-1	flavoprotein	membrane protein function unknown, probably involved in cellular metabolism	G
NC_008611	MUL_4906	72	5436304	C	G	NON	D	E	1	hypothetical protein
NC_008611	MUL_4906	74	5436306	A	G	NON	Q	R	1	hypothetical protein		G
NC_008611	MUL_4920	576	5452266	C	T	SYN	Q	Q	-1	conserved hypothetical integral membrane protein YrbE6B	membrane protein	T
NC_008611	MUL_4920	291	5452551	A	G	SYN	N	N	-1	conserved hypothetical integral membrane protein YrbE6B	membrane protein	G
NC_008611	MUL_4945	123	5477653	T	C	SYN	Y	Y	1	hypothetical protein	Detected in the membrane fraction by proteomics (LC- MS/MS) membrane protein	C
NC_008611	MUL_4945	367	5477897	G	A	NON	A	T	1	hypothetical protein	Detected in the membrane fraction by proteomics (LC- MS/MS) membrane protein	A
NC_008611	MUL_4945	433	5477963	C	T	NON	H	Y	1	hypothetical protein	Detected in the membrane fraction by proteomics (LC- MS/MS) membrane protein	T
NC_008611	MUL_4949	909	5482372	T	C	SYN	H	H	1	glycosyltransferase	membrane protein function unknown, glycosyltransferases, related to UDP-glucuronosyltransferase	C
NC_008611	MUL_4949	1128	5482591	T	C	SYN	D	D	1	glycosyltransferase	membrane protein function unknown, glycosyltransferases, related to UDP-glucuronosyltransferase	C
NC_008611	MUL_4950	111	5482959	G	A	NON	M	I	1	conserved hypothetical secreted protein	secreted protein function unknown.	A
NC_008611	MUL_4950	373	5483221	T	C	SYN	L	L	1	conserved hypothetical secreted protein	secreted protein function unknown.	C
NC_008611	MUL_4954	74	5485895	G	A	NON	C	Y	1	hypothetical protein	cytoplasmic protein	A
NC_008611	MUL_4960	168	5492948	G	A	SYN	R	R	-1	hypothetical protein	cytoplasmic protein	A
NC_008611	MUL_4961	866	5493486	A	G	NON	V	A	-1	conserved hypothetical intergral membrane protein	membrane protein	G
NC_008611	MUL_4961	856	5493496	G	A	NON	L	F	-1	conserved hypothetical intergral membrane protein	membrane protein	A
NC_008611	MUL_4961	349	5494003	A	G	SYN	L	L	-1	conserved hypothetical intergral membrane protein	membrane protein	G
NC_008611	MUL_4963	162	5495437	G	C	SYN	T	T	-1	hypothetical protein	cytoplasmic protein	C
NC_008611	MUL_4963	151	5495448	G	C	NON	L	V	-1	hypothetical protein	cytoplasmic protein
NC_008611	MUL_4974	139	5511865	C	G	NON	L	V	1	integral membrane indolylacetylinositol arabinosyltransferase EmbB	Detected in the membrane fraction by proteomics (LC- MS/MS) membrane protein involved in the biosynthesis of the mycobacterial cell wall arabinan and resistance to ethambutol (Emb; dextro-2,2'-(ethylenediimino)-di-1-butanol) polymerizes arabinose into the arabinan of arabiogalactan [catalytic activity: UDP-L-arabinose + indol-3-ylacetyl-myo-inositol = UDP + indol-3-ylacetyl-myo-inositol L-arabino…	G
NC_008611	MUL_4974	1041	5512767	T	C	SYN	R	R	1	integral membrane indolylacetylinositol arabinosyltransferase EmbB	Detected in the membrane fraction by proteomics (LC- MS/MS) membrane protein involved in the biosynthesis of the mycobacterial cell wall arabinan and resistance to ethambutol (Emb; dextro-2,2'-(ethylenediimino)-di-1-butanol) polymerizes arabinose into the arabinan of arabiogalactan [catalytic activity: UDP-L-arabinose + indol-3-ylacetyl-myo-inositol = UDP + indol-3-ylacetyl-myo-inositol L-arabino…	C
NC_008611	MUL_4974	1433	5513159	A	C	NON	N	T	1	integral membrane indolylacetylinositol arabinosyltransferase EmbB	Detected in the membrane fraction by proteomics (LC- MS/MS) membrane protein involved in the biosynthesis of the mycobacterial cell wall arabinan and resistance to ethambutol (Emb; dextro-2,2'-(ethylenediimino)-di-1-butanol) polymerizes arabinose into the arabinan of arabiogalactan [catalytic activity: UDP-L-arabinose + indol-3-ylacetyl-myo-inositol = UDP + indol-3-ylacetyl-myo-inositol L-arabino…
NC_008611	MUL_4974	1911	5513637	T	C	SYN	N	N	1	integral membrane indolylacetylinositol arabinosyltransferase EmbB	Detected in the membrane fraction by proteomics (LC- MS/MS) membrane protein involved in the biosynthesis of the mycobacterial cell wall arabinan and resistance to ethambutol (Emb; dextro-2,2'-(ethylenediimino)-di-1-butanol) polymerizes arabinose into the arabinan of arabiogalactan [catalytic activity: UDP-L-arabinose + indol-3-ylacetyl-myo-inositol = UDP + indol-3-ylacetyl-myo-inositol L-arabino…	C
NC_008611	MUL_4982	387	5525152	G	A	SYN	G	G	-1	propionyl-CoA carboxylase beta chain 4 AccD4_1	Detected in the membrane fraction by proteomics (LC- MS/MS) membrane protein key enzyme in the catabolic pathway of odd-chain fatty acids, isoleucine, threonine, methionine, and valine [catalytic activity: ATP + propionyl-CoA + CO(2) + H(2)O = ADP + orthophosphate + methylmalonyl-CoA]	A
NC_008611	MUL_4983	4912	5526008	C	G	NON	E	Q	-1	polyketide synthase Pks13	cytoplasmic protein the enzyme responsible for the final condensation step in mycolic acid biosynthesis, bringing the short and long (mero) chains together.	G
NC_008611	MUL_4983	2454	5528466	T	C	SYN	S	S	-1	polyketide synthase Pks13	cytoplasmic protein the enzyme responsible for the final condensation step in mycolic acid biosynthesis, bringing the short and long (mero) chains together.	C
NC_008611	MUL_4983	1614	5529306	A	G	SYN	H	H	-1	polyketide synthase Pks13	cytoplasmic protein the enzyme responsible for the final condensation step in mycolic acid biosynthesis, bringing the short and long (mero) chains together.	G
NC_008611	MUL_4983	631	5530289	A	G	SYN	L	L	-1	polyketide synthase Pks13	cytoplasmic protein the enzyme responsible for the final condensation step in mycolic acid biosynthesis, bringing the short and long (mero) chains together.	G
NC_008611	MUL_4986	388	5534928	A	G	SYN	L	L	-1	secreted Mpt51/Mpb51 antigen protein FbpD	Also detected in the membrane fraction by proteomics (2D-LC-MS/MS) secreted protein involved in cell wall mycoloylation. proteins of the antigen 85 complex are responsible for the high affinity of mycobacteria to fibronectin. possesses a mycolyltransferase activity required for the biogenesis of trehalose dimycolate (cord factor), a dominant structure necessary for maintaining cell wall integrity.	G
NC_008611	MUL_4986	372	5534944	G	T	SYN	T	T	-1	secreted Mpt51/Mpb51 antigen protein FbpD	Also detected in the membrane fraction by proteomics (2D-LC-MS/MS) secreted protein involved in cell wall mycoloylation. proteins of the antigen 85 complex are responsible for the high affinity of mycobacteria to fibronectin. possesses a mycolyltransferase activity required for the biogenesis of trehalose dimycolate (cord factor), a dominant structure necessary for maintaining cell wall integrity.	T
NC_008611	MUL_4986	353	5534963	C	T	NON	G	D	-1	secreted Mpt51/Mpb51 antigen protein FbpD	Also detected in the membrane fraction by proteomics (2D-LC-MS/MS) secreted protein involved in cell wall mycoloylation. proteins of the antigen 85 complex are responsible for the high affinity of mycobacteria to fibronectin. possesses a mycolyltransferase activity required for the biogenesis of trehalose dimycolate (cord factor), a dominant structure necessary for maintaining cell wall integrity.	T
NC_008611	MUL_4987	953	5535540	C	T	NON	R	K	-1	secreted antigen 85-A FbpA	Also detected in the membrane fraction by proteomics (2D-LC-MS/MS) secreted protein involved in cell wall mycoloylation. proteins of the antigen 85 complex are responsible for the high affinity of mycobacteria to fibronectin. possesses a mycolyltransferase activity required for the biogenesis of trehalose dimycolate (cord factor), a dominant structure necessary for maintaining cell wall integrity.	T
NC_008611	MUL_4989	553	5538276	G	A	NON	L	F	-1	conserved transmembrane protein	Detected in the membrane fraction by proteomics (LC- MS/MS) membrane protein	A
NC_008611	MUL_4989	60	5538769	G	C	SYN	L	L	-1	conserved transmembrane protein	Detected in the membrane fraction by proteomics (LC- MS/MS) membrane protein	C
NC_008611	MUL_4989	24	5538805	T	C	SYN	P	P	-1	conserved transmembrane protein	Detected in the membrane fraction by proteomics (LC- MS/MS) membrane protein	C
NC_008611	MUL_4995	661	5545497	A	G	NON	T	A	1	conserved hypothetical secreted protein	secreted protein	G
NC_008611	MUL_4995	687	5545523	A	C	NON	Q	H	1	conserved hypothetical secreted protein	secreted protein	C
NC_008611	MUL_4995	1331	5546167	T	C	NON	V	A	1	conserved hypothetical secreted protein	secreted protein	C
NC_008611	MUL_4995	1589	5546425	A	G	NON	E	G	1	conserved hypothetical secreted protein	secreted protein	G
NC_008611	MUL_4997	353	5547735	G	C	NON	A	G	-1	acyltransferase	cytoplasmic protein function unknown, probably involved in cellular metabolism.	C
NC_008611	MUL_4998	72	5548805	G	A	SYN	I	I	-1	acyltransferase	cytoplasmic protein function unknown, probably involved in cellular metabolism.	A
NC_008611	MUL_5004	194	5554459	G	A	NON	T	I	-1	transcriptional regulatory protein (probably TetR-family)	cytoplasmic protein involved in transcriptional mechanism.	A
NC_008611	MUL_5007	236	5556866	G	C	NON	G	A	1	hypothetical protein	membrane protein	C
NC_008611	MUL_5007	732	5557362	C	T	SYN	N	N	1	hypothetical protein	membrane protein	T
NC_008611	MUL_5012	238	5560605	A	G	NON	T	A	1	hypothetical protein	cytoplasmic protein	G
NC_008611	MUL_5013	111	5561359	C	G	SYN	A	A	1	transcriptional regulatory protein	membrane protein supposed involved in transcriptional mechanism.	G
NC_008611	MUL_5013	611	5561859	G	C	NON	R	P	1	transcriptional regulatory protein	membrane protein supposed involved in transcriptional mechanism.	C
NC_008611	MUL_5016	774	5564374	C	T	SYN	V	V	-1	hypothetical protein	membrane protein	T
NC_008611	MUL_5018	528	5566445	T	C	SYN	D	D	1	superoxide dismutase [fe] SodA	Three isoforms were detected in the cytoplasm. Also detected in the extracellular matrix and the membrane fraction by proteomics. cytoplasmic protein destroys radicals which are normally produced within the cells and are toxic to biological systems [catalytic activity: 2 peroxide radical + 2 H(+) = O(2) + H(2)O(2)]	C
NC_008611	MUL_5022	93	5569326	C	T	SYN	S	S	1	hypothetical protein	Detected in the membrane fraction by proteomics (LC- MS/MS) membrane protein	T
NC_008611	MUL_5026	1378	5571410	C	T	NON	D	N	-1	monooxygenase EthA	cytoplasmic protein activates the pro-drug ethionamide (eth); induced eth sensitivity when overexpressed in mycobacterium tuberculosis.	T
NC_008611	MUL_5033	393	5578068	C	A	SYN	L	L	-1	hypothetical protein	cytoplasmic protein	A
NC_008611	MUL_5034	724	5579447	G	A	NON	E	K	1	hypothetical protein	cytoplasmic protein	A
NC_008611	MUL_5034	741	5579464	C	G	SYN	L	L	1	hypothetical protein	cytoplasmic protein	G
NC_008611	MUL_5045	177	5599504	C	T	SYN	A	A	-1	hypothetical protein	membrane protein	T
NC_008611	MUL_5045	173	5599508	C	G	NON	G	A	-1	hypothetical protein	membrane protein
NC_008611	MUL_5048	738	5601498	C	G	SYN	T	T	-1	hypothetical protein	cytoplasmic protein	G
NC_008611	MUL_5057	1251	5608935	C	T	SYN	G	G	-1	hypothetical protein	cytoplasmic protein	T
NC_008611	MUL_5057	927	5609259	C	G	SYN	V	V	-1	hypothetical protein	cytoplasmic protein	G
NC_008611	MUL_5057	917	5609269	G	C	NON	A	G	-1	hypothetical protein	cytoplasmic protein	C
NC_008611	MUL_5057	480	5609706	T	C	NON	A	T	-1	hypothetical protein	cytoplasmic protein
NC_008611	MUL_5057	478	5609708	C	T	NON	A	T	-1	hypothetical protein	cytoplasmic protein	T
NC_008611	MUL_5060	1427	5611613	C	T	NON	R	Q	-1	poly(a) polymerase PcnA	cytoplasmic protein involved in transcription mechanism [catalytic activity: N ATP + (nucleotide)(M) = N diphosphate + (nucleotide)(M+N)]	T
NC_008611	MUL_5060	435	5612605	C	G	SYN	A	A	-1	poly(a) polymerase PcnA	cytoplasmic protein involved in transcription mechanism [catalytic activity: N ATP + (nucleotide)(M) = N diphosphate + (nucleotide)(M+N)]	G
NC_008611	MUL_5061	695	5613899	C	T	NON	A	V	1	hypothetical protein	cytoplasmic protein	T
NC_008611	MUL_5062	111	5614088	G	C	SYN	V	V	1	conserved hypothetical secreted protein	secreted protein	C
NC_008611	MUL_5062	439	5614416	T	C	SYN	L	L	1	conserved hypothetical secreted protein	secreted protein	C
NC_008611	MUL_5062	1565	5615542	T	C	NON	L	S	1	conserved hypothetical secreted protein	secreted protein	C
NC_008611	MUL_5062	1785	5615762	G	T	NON	L	F	1	conserved hypothetical secreted protein	secreted protein	T
NC_008611	MUL_5063	1964	5618409	T	A	NON	L	Q	1	conserved transmembrane protein	Detected in the membrane fraction by proteomics (LC- MS/MS) Also detected in the cytoplasmic fraction by 2D-LC- MS/MS. membrane protein
NC_008611	MUL_5063	2215	5618660	G	A	NON	D	N	1	conserved transmembrane protein	Detected in the membrane fraction by proteomics (LC- MS/MS) Also detected in the cytoplasmic fraction by 2D-LC- MS/MS. membrane protein	A
NC_008611	MUL_5063	2400	5618845	G	A	SYN	P	P	1	conserved transmembrane protein	Detected in the membrane fraction by proteomics (LC- MS/MS) Also detected in the cytoplasmic fraction by 2D-LC- MS/MS. membrane protein	A
NC_008611	MUL_5063	2421	5618866	C	G	NON	I	M	1	conserved transmembrane protein	Detected in the membrane fraction by proteomics (LC- MS/MS) Also detected in the cytoplasmic fraction by 2D-LC- MS/MS. membrane protein	G
NC_008611	MUL_5064	288	5620337	G	C	NON	E	D	1	alternative RNA polymerase sigma factor SigM	cytoplasmic protein the sigma factor is an initiation factor that promotes attachment of the RNA polymerase to specific initiation sites and then is released.	C
NC_008611	MUL_5064	304	5620353	G	A	NON	E	K	1	alternative RNA polymerase sigma factor SigM	cytoplasmic protein the sigma factor is an initiation factor that promotes attachment of the RNA polymerase to specific initiation sites and then is released.	A
NC_008611	MUL_5064	460	5620509	C	G	NON	P	A	1	alternative RNA polymerase sigma factor SigM	cytoplasmic protein the sigma factor is an initiation factor that promotes attachment of the RNA polymerase to specific initiation sites and then is released.	G
NC_008611	MUL_5065	714	5621426	G	C	SYN	L	L	1	conserved hypothetical alanine rich membrane protein	membrane protein	C
NC_008611	MUL_5068	723	5623754	C	G	NON	F	L	1	hydrolase	cytoplasmic protein function unknown, probably involved in cellular metabolism.
NC_008611	MUL_5068	736	5623767	A	C	NON	N	H	1	hydrolase	cytoplasmic protein function unknown, probably involved in cellular metabolism.
NC_008611	MUL_5069	479	5624545	G	A	NON	A	V	-1	hypothetical protein	cytoplasmic protein	A
NC_008611	MUL_5072	64	5628229	A	G	NON	C	R	-1	glucose-inhibited division protein B Gid	cytoplasmic protein	G
NC_005916	MUP001	0	1107						+	probable replication protein Rep
NC_005916	MUP002c	1116	1431						-	hypothetical protein
NC_005916	MUP003	1693	2290						+	hypothetical protein
NC_005916	MUP004c	2309	2924						-	hypothetical protein
NC_005916	MUP005c	2920	3901						-	possible chromosome partitioning protein ParA
NC_005916	MUP006c	5639	6386						-	hypothetical protein
NC_005916	MUP007c	6382	6604						-	hypothetical protein
NC_005916	MUP008c	6611	7160						-	possible nucleic acid binding protein
NC_005916	MUP009	7187	7616						+	hypothetical protein
NC_005916	MUP010	7629	8421						+	hypothetical protein
NC_005916	MUP011	8429	10412						+	probable transmembrane serine/threonine-protein kinase PknQ
NC_005916	MUP012c	10428	10692						-	hypothetical protein
NC_005916	MUP013c	10688	11147						-	possible conserved membrane protein
NC_005916	MUP014c	11148	11922						-	putative integral membrane protein
NC_005916	MUP015c	11915	12692						-	possible secreted protein
NC_005916	MUP016c	12688	13480						-	hypothetical protein
NC_005916	MUP017c	13476	13929						-	possible conserved transmembrane protein
NC_005916	MUP018c	13972	15061						-	probable forkhead-associated protein
NC_005916	MUP019	15405	16440						+	probable conserved membrane protein
NC_005916	MUP020	16429	16612						+	hypothetical protein
NC_005916	MUP021	16608	16872						+	possible transcriptional regulatory protein
NC_005916	MUP023c	18771	19404						-	hypothetical protein
NC_005916	MUP024c	19400	19988						-	hypothetical protein
NC_005916	MUP032c	30053	72446						-	Type I modular polyketide synthase
NC_005916	MUP038c	78018	78924						-	possible thioesterase
NC_005916	MUP039c	79079	86312						-	Type I modular polyketide synthase
NC_005916	MUP040c	86298	137271						-	Type I modular polyketide synthase
NC_005916	MUP045	140605	141592						+	probable beta-ketoacyl synthase-like protein
NC_005916	MUP046	142321	142615						+	possible membrane protein
NC_005916	MUP053c	147545	148859						-	probable cytochrome p450 150 cyp150
NC_005916	MUP054c	148855	149359						-	possible integrase fragment
NC_005916	MUP056c	150861	151242						-	hypothetical protein
NC_005916	MUP057c	151340	152117						-	possible lipoprotein
NC_005916	MUP058c	152313	153351						-	possible site-specific recombinase
NC_005916	MUP064c	157888	158251						-	possible conserved membrane protein
NC_005916	MUP065c	158470	159352						-	hypothetical protein
NC_005916	MUP066c	159823	160330						-	hypothetical protein
NC_005916	MUP067c	160416	161049						-	hypothetical protein
NC_005916	MUP068c	161084	162215						-	hypothetical protein
NC_005916	MUP070c	163726	164824						-	hypothetical protein
NC_005916	MUP071c	164672	165089						-	hypothetical protein
NC_005916	MUP072c	165160	166357						-	hypothetical protein
NC_005916	MUP073c	166353	167547						-	hypothetical protein
NC_005916	MUP074c	167567	168152						-	possible membrane protein
NC_005916	MUP075c	168148	168487						-	hypothetical protein
NC_005916	MUP076c	168486	169158						-	possible membrane protein
NC_005916	MUP077c	169191	169584						-	hypothetical protein
NC_005916	MUP078c	169758	171342						-	hypothetical protein
NC_005916	MUP079c	171360	171660						-	hypothetical protein
NC_005916	MUP080c	171666	171939						-	hypothetical protein
NC_005916	MUP081c	172001	173546						-	hypothetical protein
NC_008611	MUL_0007	9949	10947						+	hypothetical protein
NC_008611	MUL_0011	12225	12986						-	transcriptional regulator
NC_008611	MUL_0012	13097	13501						-	hypothetical protein
NC_008611	MUL_0013	13691	14239						+	peptidyl-prolyl cis-trans isomerase A, PpiA
NC_008611	MUL_0014	14250	14675						-	hypothetical protein
NC_008611	MUL_0040	39468	39884						-	transcriptional regulatory protein (Whib-like), WhiB5
NC_008611	MUL_0048	45442	45762						+	hypothetical protein
NC_008611	MUL_0057	54756	55421						-	short-chain type oxidoreductase
NC_008611	MUL_0058	55462	55965						-	transcriptional regulatory protein
NC_008611	MUL_0081	77913	78218						+	hypothetical protein
NC_008611	MUL_0084	80415	80999						+	hypothetical protein
NC_008611	MUL_0094	90312	92285						-	conserved transmembrane protein
NC_008611	MUL_0095	92416	93612						+	aminotransferase
NC_008611	MUL_0096	93652	94644						-	oxidoreductase
NC_008611	MUL_0133	135369	135608						+	hypothetical protein
NC_008611	MUL_0137	140258	140908						+	hypothetical protein
NC_008611	MUL_0140	145487	145996						-	hypothetical protein
NC_008611	MUL_0144	149589	150515						-	epoxide hydrolase EphC
NC_008611	MUL_0146	151637	152113						-	hypothetical protein
NC_008611	MUL_0167	169882	171102						+	hypothetical protein
NC_008611	MUL_0217	222531	222998						+	lipoprotein LpqV
NC_008611	MUL_0230	236131	237330						-	hypothetical protein
NC_008611	MUL_0237	245553	247034						+	acetyl-coenzyme a carboxylase carboxyl transferase (subunit beta) AccD3
NC_008611	MUL_0245	253251	253772						-	transcriptional regulatory protein
NC_008611	MUL_0247	254272	255651						+	hypothetical protein
NC_008611	MUL_0248	255802	256512						+	two component response transcriptional regulatory protein PrrA
NC_008611	MUL_0251	258526	258759						-	hypothetical protein
NC_008611	MUL_0253	259883	260146						+	hypothetical protein
NC_008611	MUL_0257	265165	265653						-	pyridoxamine 5'-phosphate oxidase PdxH
NC_008611	MUL_0259	266751	267605						+	citrate synthase II CitA
NC_008611	MUL_0264	273672	275357						-	NADPH:adrenodoxin oxidoreductase FprB
NC_008611	MUL_0266	276608	277738						+	phosphoserine aminotransferase SerC
NC_008611	MUL_0270	279768	280199						-	transcriptional regulatory protein (possibly marR-family)
NC_008611	MUL_0279	288432	288986						-	cold shock-like protein B CspB
NC_008611	MUL_0283	291203	292066						+	resuscitation-promoting factor RpfA
NC_008611	MUL_0291	298676	298996						+	hypothetical protein
NC_008611	MUL_0293	300077	300616						-	transcriptional regulator
NC_008611	MUL_0299	307165	307620						-	hypothetical protein
NC_008611	MUL_0309	316438	316860						-	conserved lipoprotein
NC_008611	MUL_0313	318774	319097						+	hypothetical protein
NC_008611	MUL_0320	325454	325954						+	hypothetical protein
NC_008611	MUL_0323	329643	330296						+	transcriptional regulatory protein
NC_008611	MUL_0324	330530	331732						+	cytochrome P450 189A7 Cyp189A7
NC_008611	MUL_0334	342509	342703						-	ferredoxin
NC_008611	MUL_0340	347877	348293						-	lipoprotein LpqS
NC_008611	MUL_0355	365985	366284						-	PE-PGRS family protein family protein
NC_008611	MUL_0358	368579	369409						+	proline iminopeptidase PIP
NC_008611	MUL_0359	369438	370205						-	enoyl-CoA hydratase
NC_008611	MUL_0361	371291	372160						-	acyl-CoA dehydrogenase
NC_008611	MUL_0371	381870	382724						+	chitinase/cellulase
NC_008611	MUL_0375	386470	387429						+	phytoene synthase, CrtB
NC_008611	MUL_0384	395104	395346						-	hypothetical protein
NC_008611	MUL_0391	402249	403910						+	PE-PGRS family protein
NC_008611	MUL_0392	404179	404382						-	cold shock protein a, CspA
NC_008611	MUL_0397	411698	412234						+	hypothetical protein
NC_008611	MUL_0399	413626	414087						-	PPE family protein
NC_008611	MUL_0411	425084	425698						+	conserved hypothetical secreted protein
NC_008611	MUL_0415	429782	430987						-	MCE-family protein Mce2A
NC_008611	MUL_0416	431007	431396						+	hypothetical protein
NC_008611	MUL_0433	445281	445748						-	integral membrane protein
NC_008611	MUL_0434	446048	446860						-	hypothetical protein
NC_008611	MUL_0437	449127	450233						+	phosphate-binding protein 3 precursor, PhoS3
NC_008611	MUL_0441	453058	453726						-	phosphate-transport system regulatory protein, PhoY2
NC_008611	MUL_0449	460914	461222						-	hypothetical protein
NC_008611	MUL_0453	464190	465446						-	hypothetical protein
NC_008611	MUL_0463	476453	477175						+	two component system response phosphate regulon transcriptional regulator, PhoP
NC_008611	MUL_0483	496226	497140						+	hypothetical protein
NC_008611	MUL_0487	502580	503518						-	hypothetical protein
NC_008611	MUL_0504	521765	521959						-	hypothetical protein
NC_008611	MUL_0505	521934	522296						-	conserved hypothetical secreted protein
NC_008611	MUL_0508	523885	524253						+	hypothetical protein
NC_008611	MUL_0509	524368	524871						+	excisionase
NC_008611	MUL_0510	524902	525072						+	hypothetical protein
NC_008611	MUL_0511	525269	525502						+	hypothetical protein
NC_008611	MUL_0512	525804	527240						+	hypothetical protein
NC_008611	MUL_0513	527247	528020						-	hypothetical protein
NC_008611	MUL_0515	528829	530424						+	hypothetical protein
NC_008611	MUL_0516	530613	531470						+	hypothetical protein
NC_008611	MUL_0517	531483	531635						+	hypothetical protein
NC_008611	MUL_0518	531637	532416						+	hypothetical protein
NC_008611	MUL_0523	537317	537520						+	hypothetical protein
NC_008611	MUL_0524	537534	537968						-	hypothetical protein
NC_008611	MUL_0525	538041	538835						+	transcriptional regulatory protein
NC_008611	MUL_0526	538935	539357						+	hypothetical protein
NC_008611	MUL_0527	539414	540676						+	hypothetical protein
NC_008611	MUL_0528	540685	540948						+	hypothetical protein
NC_008611	MUL_0529	540948	542117						+	prophage integrase
NC_008611	MUL_0551	561042	561290						-	hypothetical protein
NC_008611	MUL_0554	562014	562793						-	transcriptional regulatory protein
NC_008611	MUL_0559	565709	566377						+	conserved hypothetical secreted protein
NC_008611	MUL_0562	568350	568718						-	hypothetical protein
NC_008611	MUL_0572	577925	580594						+	PE-PGRS family protein
NC_008611	MUL_0578	590363	590902						+	hypothetical protein
NC_008611	MUL_0583	599379	599903						-	conserved threonine-rich hypothetical protein
NC_008611	MUL_0584	600011	600592						-	hypothetical protein
NC_008611	MUL_0585	600629	601192						-	conserved hypothetical lipoprotein, LpqJ
NC_008611	MUL_0611	631231	632223						+	hypothetical protein
NC_008611	MUL_0668	692900	693595						+	serine protease
NC_008611	MUL_0681	707984	708607						+	TetR-family transcriptional regulator
NC_008611	MUL_0685	710901	711080						+	hypothetical membrane protein
NC_008611	MUL_0690	717353	717700						-	oxidoreductase
NC_008611	MUL_0735	767959	768870						-	lipase/esterase LipG2
NC_008611	MUL_0760	805358	805747						-	hypothetical protein
NC_008611	MUL_0761	805885	806262						-	hypothetical protein
NC_008611	MUL_0763	807549	807923						+	30S ribosomal protein S12, RpsL
NC_008611	MUL_0824	862943	864178						+	D-xylulose-kinase (xylulokinase), XylB
NC_008611	MUL_0829	868628	869173						+	adenylate kinase (ATP-AMP transphosphorylase), Adk
NC_008611	MUL_0863	903768	904064						+	EsaT-6 like protein, EsxT
NC_008611	MUL_0889	928988	929425						-	hypothetical protein
NC_008611	MUL_0894	933955	935610						+	metal-dependent hydrolase
NC_008611	MUL_0908	951308	951865						-	hydrolase
NC_008611	MUL_0909	951947	952465						+	hypothetical protein
NC_008611	MUL_0929	976518	976730						-	hypothetical protein
NC_008611	MUL_0951	998130	998492						-	hypothetical protein
NC_008611	MUL_0952	998647	999147						+	conserved hypothetical regulatory protein
NC_008611	MUL_0953	999202	1000146						-	transferase
NC_008611	MUL_0967	1016724	1018367						-	PE family protein
NC_008611	MUL_1003	1054598	1054744						+	hypothetical protein
NC_008611	MUL_1007	1058099	1058377						-	hypothetical protein
NC_008611	MUL_1054	1113151	1113987						+	esterase LipW
NC_008611	MUL_1104	1175568	1175825						-	hypothetical protein
NC_008611	MUL_1125	1203092	1204879						-	conserved transmembrane protein
NC_008611	MUL_1127	1206320	1207528						+	integral membrane acyltransferase
NC_008611	MUL_1135	1214094	1214321						+	hypothetical protein
NC_008611	MUL_1136	1214390	1215136						-	hypothetical protein
NC_008611	MUL_1140	1218243	1218656						+	hypothetical protein
NC_008611	MUL_1141	1218666	1218959						+	hypothetical protein
NC_008611	MUL_1142	1219033	1219251						+	conserved secreted protein
NC_008611	MUL_1145	1221305	1223809						+	PE-PGRS family protein
NC_008611	MUL_1149	1227605	1228489						-	PE-PGRS family protein
NC_008611	MUL_1150	1228670	1229650						-	phosphotriesterase Php
NC_008611	MUL_1155	1235788	1238157						+	PE-PGRS family protein
NC_008611	MUL_1157	1239794	1240555						-	glycerophosphoryl diester phosphodiesterase GlpQ2
NC_008611	MUL_1177	1263037	1263726						+	PEP phosphonomutase
NC_008611	MUL_1180	1267066	1267422						+	nitrite reductase [NAD(P)H] small subunit NirD
NC_008611	MUL_1197	1285943	1286551						-	transcriptional regulatory protein
NC_008611	MUL_1231	1329776	1330147						+	hypothetical protein
NC_008611	MUL_1252	1355342	1356115						+	conserved hypothetical secreted protein
NC_008611	MUL_1255	1359441	1359968						+	hypothetical protein
NC_008611	MUL_1256	1360070	1360504						-	hypothetical protein
NC_008611	MUL_1259	1361169	1361369						+	hypothetical protein
NC_008611	MUL_1264	1365078	1365560						+	6-pyruvoyl tetrahydrobiopterin synthase
NC_008611	MUL_1266	1367290	1367745						+	hypothetical protein
NC_008611	MUL_1280	1376289	1376915						+	hypothetical protein
NC_008611	MUL_1293	1390243	1391313						+	transcriptional regulatory protein
NC_008611	MUL_1309	1409192	1409794						+	hypothetical protein
NC_008611	MUL_1338	1441534	1442181						+	hypothetical protein
NC_008611	MUL_1339	1442226	1444406						-	PE-PGRS family protein
NC_008611	MUL_1341	1446349	1446771						+	hypothetical protein
NC_008611	MUL_1342	1446822	1447574						-	conserved transmembrane protein
NC_008611	MUL_1352	1458615	1458842						-	hypothetical protein
NC_008611	MUL_1363	1469784	1471004						+	PE-PGRS family protein
NC_008611	MUL_1381	1485385	1486047						-	transcriptional regulatory protein (GntR- family)
NC_008611	MUL_1430	1537002	1537418						-	conserved secreted protein
NC_008611	MUL_1434	1549194	1549490						-	hypothetical secreted protein
NC_008611	MUL_1435	1549552	1549899						-	exported protein
NC_008611	MUL_1460	1579146	1579391						-	hypothetical protein
NC_008611	MUL_1468	1585082	1585987						+	conserved integral membrane transport protein
NC_008611	MUL_1478	1600990	1601346						+	thioredoxin TrxA
NC_008611	MUL_1479	1601432	1601761						+	thioredoxin TrxB1
NC_008611	MUL_1482	1604392	1604583						+	transcriptional regulatory protein
NC_008611	MUL_1484	1605158	1607989						-	aconitate hydratase Acn
NC_008611	MUL_1487	1610498	1611217						+	invasion protein Inv2
NC_008611	MUL_1491	1614659	1615426						+	3-oxoacyl-[acyl-carrier protein] reductase, FabG1
NC_008611	MUL_1492	1615505	1616314						+	enoyl-[acyl-carrier-protein] reductase, InhA
NC_008611	MUL_1494	1617350	1618345						-	hypothetical protein
NC_008611	MUL_1500	1622266	1622880						-	transcriptional regulator
NC_008611	MUL_1501	1623755	1624498						+	two component regulator - receiver domain
NC_008611	MUL_1502	1624498	1626018						+	two component regulator - sensor kinase
NC_008611	MUL_1544	1669186	1669617						+	hypothetical protein
NC_008611	MUL_1548	1677076	1677306						-	hypothetical protein
NC_008611	MUL_1571	1703249	1703659						-	hypothetical protein
NC_008611	MUL_1593	1726767	1727576						+	tryptophan synthase, alpha subunit TrpA
NC_008611	MUL_1613	1750713	1751936						+	dephospho-CoA kinase CoaE
NC_008611	MUL_1615	1752651	1753091						-	hypothetical protein
NC_008611	MUL_1621	1760106	1760783						-	hypothetical protein
NC_008611	MUL_1625	1766008	1767453						-	hypothetical protein
NC_008611	MUL_1634	1776792	1777574						+	transmembrane protein
NC_008611	MUL_1662	1830751	1831197						+	lactoylglutathione lyase, GloA
NC_008611	MUL_1669	1838234	1838524						+	hypothetical protein
NC_008611	MUL_1697	1868798	1870177						+	hypothetical protein
NC_008611	MUL_1698	1870323	1871297						+	hypothetical protein
NC_008611	MUL_1706	1883056	1883310						-	hypothetical protein
NC_008611	MUL_1740	1923673	1924557						-	conserved membrane glycine rich protein
NC_008611	MUL_1827	2019745	2020362						-	hypothetical protein
NC_008611	MUL_1870	2072540	2073358						-	PE-PGRS family protein
NC_008611	MUL_1876	2077472	2077711						+	glutaredoxin electron transport component of NRDEF (glutaredoxin-like protein) NrdH
NC_008611	MUL_1879	2080466	2081209						+	transcriptional regulatory protein (probably AsnC-family)
NC_008611	MUL_1987	2194207	2195055						-	oxidoreductase
NC_008611	MUL_1994	2202402	2202875						+	phosphopantetheine adenylyltransferase KdtB
NC_008611	MUL_2009	2228774	2229550						+	methyltransferase
NC_008611	MUL_2060	2307327	2307695						+	hypothetical protein
NC_008611	MUL_2065	2312473	2313381						+	integrase/recombinase XerC
NC_008611	MUL_2079	2325505	2325978						+	soluble secreted antigen Mpt53 precursor
NC_008611	MUL_2087	2333746	2334837						+	4-hydroxy-3-methylbut-2-en-1-yl diphosphate synthase, IspG
NC_008611	MUL_2094	2341023	2341991						-	PPE family protein
NC_008611	MUL_2106	2352209	2352322						+	hypothetical protein
NC_008611	MUL_2108	2353829	2354851						-	hypothetical protein
NC_008611	MUL_2123	2372024	2372551						+	ribosome-binding factor a RbfA
NC_008611	MUL_2166	2415526	2415990						+	hypothetical protein
NC_008611	MUL_2201	2457915	2458244						-	hypothetical protein
NC_008611	MUL_2208	2469261	2469818						-	conserved hypothetical secreted protein
NC_008611	MUL_2210	2471577	2472005						+	chitinase/cellulase
NC_008611	MUL_2213	2474337	2474669						-	muconolactone isomerase
NC_008611	MUL_2216	2476522	2476716						-	hypothetical protein
NC_008611	MUL_2233	2489971	2490417						+	GTP cyclohydrolase I FolE_1
NC_008611	MUL_2247	2498760	2499422						-	PPE family protein
NC_008611	MUL_2262	2516217	2516897						+	lipoprotein LppI
NC_008611	MUL_2264	2518033	2518413						+	hypothetical protein
NC_008611	MUL_2275	2544663	2545541						-	hypothetical protein
NC_008611	MUL_2276	2545552	2545935						-	hypothetical protein
NC_008611	MUL_2282	2552918	2553745						+	short-chain dehydrogenase
NC_008611	MUL_2288	2558891	2560000						+	cobalamin biosynthesis protein
NC_008611	MUL_2317	2592285	2592548						-	hypothetical protein
NC_008611	MUL_2323	2599846	2600610						-	hypothetical protein
NC_008611	MUL_2333	2610468	2611976						-	hypothetical protein
NC_008611	MUL_2338	2617331	2617990						+	conserved lipoprotein, LppK
NC_008611	MUL_2354	2640512	2642440						-	PE-PGRS family protein
NC_008611	MUL_2367	2655073	2655453						-	hypothetical protein
NC_008611	MUL_2379	2664299	2664529						-	hypothetical protein
NC_008611	MUL_2381	2665397	2665627						-	conserved protein MbtH
NC_008611	MUL_2387	2672027	2672707						-	hypothetical protein
NC_008611	MUL_2390	2674336	2675202						+	hypothetical protein
NC_008611	MUL_2393	2676498	2676851						-	hypothetical protein
NC_008611	MUL_2395	2677467	2678669						+	PE family protein
NC_008611	MUL_2413	2694868	2696313						+	NADPH:adrenodoxin oxidoreductase FprA_1
NC_008611	MUL_2437	2724109	2725344						+	hypothetical protein
NC_008611	MUL_2438	2725412	2726410						+	oxidoreductase
NC_008611	MUL_2451	2739926	2740336						+	hypothetical protein
NC_008611	MUL_2475	2766481	2766930						-	hypothetical protein
NC_008611	MUL_2476	2766932	2768209						-	hypothetical protein
NC_008611	MUL_2477	2768223	2769191						-	methanol dehydrogenase transcriptional regulatory protein MoxR3
NC_008611	MUL_2489	2780638	2781948						+	monoamine oxidase
NC_008611	MUL_2497	2788573	2790024						+	transcriptional regulatory protein
NC_008611	MUL_2502	2794174	2794548						-	FK-506 binding protein, peptidyl-prolyl cis- trans isomerase
NC_008611	MUL_2504	2795113	2796126						+	hypothetical protein
NC_008611	MUL_2507	2800481	2801899						+	hypothetical protein
NC_008611	MUL_2513	2807557	2807811						+	glutaredoxin protein
NC_008611	MUL_2547	2842901	2843236						+	hypothetical protein
NC_008611	MUL_2565	2862565	2863851						-	linoleoyl-CoA desaturase, DesA3
NC_008611	MUL_2617	2919025	2919726						-	hypothetical protein
NC_008611	MUL_2642	2953173	2953484						-	mycobacterial conserved protein, UsfY
NC_008611	MUL_2646	2955943	2957214						+	hypothetical protein
NC_008611	MUL_2679	2997293	2998672						+	conserved hypothetical 13E12 repeat family protein
NC_008611	MUL_2699	3018711	3019973						+	NADPH:adrenodoxin oxidoreductase FprA
NC_008611	MUL_2701	3020551	3021144						-	conserved transcriptional regulatory protein
NC_008611	MUL_2702	3021329	3021988						-	PE-PGRS family protein
NC_008611	MUL_2727	3046737	3047936						+	aminotransferase
NC_008611	MUL_2728	3047940	3048485						-	conserved hypothetical regulatory protein
NC_008611	MUL_2730	3049487	3050215						-	monophosphatase CysQ_1
NC_008611	MUL_2739	3062991	3063947						+	methylase
NC_008611	MUL_2742	3065334	3066116						+	hypothetical protein
NC_008611	MUL_2755	3079392	3080012						+	oxidoreductase
NC_008611	MUL_2761	3083950	3084438						-	conserved hypothetical secreted protein
NC_008611	MUL_2763	3085932	3086537						-	hypothetical protein
NC_008611	MUL_2765	3087587	3088222						-	methyltransferase (methylase)
NC_008611	MUL_2766	3088219	3089151						-	O-methyltransferase
NC_008611	MUL_2767	3089265	3089681						+	hypothetical protein
NC_008611	MUL_2768	3089761	3090603						+	hypothetical protein
NC_008611	MUL_2769	3090835	3092166						-	hypothetical protein
NC_008611	MUL_2770	3092159	3093346						-	hypothetical protein
NC_008611	MUL_2772	3094565	3095197						+	hypothetical protein
NC_008611	MUL_2773	3095672	3096592						+	hypothetical protein
NC_008611	MUL_2774	3096693	3099638						-	hypothetical protein
NC_008611	MUL_2775	3099709	3100491						+	hypothetical protein
NC_008611	MUL_2786	3112125	3112883						+	alanine rich hydrolase
NC_008611	MUL_2789	3116266	3117756						-	aldehyde dehydrogenase NAD dependent
NC_008611	MUL_2793	3120805	3121371						-	transcriptional regulatory protein
NC_008611	MUL_2830	3159790	3159897						+	hypothetical protein
NC_008611	MUL_2831	3160003	3160281						+	hypothetical protein
NC_008611	MUL_2835	3163479	3164156						+	hypothetical protein
NC_008611	MUL_2839	3167060	3167314						-	hypothetical protein
NC_008611	MUL_2843	3169801	3170475						-	8-amino-7-oxononanoate synthase BioF2_3
NC_008611	MUL_2853	3180728	3181936						+	PE-PGRS family protein
NC_008611	MUL_2856	3184204	3184521						-	hypothetical protein
NC_008611	MUL_2861	3187661	3187948						-	hypothetical protein
NC_008611	MUL_2862	3188463	3188753						-	conserved hypothetical oxidoreductase
NC_008611	MUL_2872	3198561	3199394						-	conserved hypothetical integral membrane protein YrbE3A
NC_008611	MUL_5111	3224436	3224819						-	hypothetical protein
NC_008611	MUL_2907	3232029	3232505						-	hypothetical protein
NC_008611	MUL_2910	3234251	3234664						-	hypothetical protein
NC_008611	MUL_2916	3241943	3242422						+	hypothetical protein
NC_008611	MUL_2917	3242562	3243140						+	hypothetical protein
NC_008611	MUL_2922	3248100	3248624						+	transcriptional regulator (TetR family)
NC_008611	MUL_2924	3248804	3249205						+	hypothetical protein
NC_008611	MUL_2925	3249499	3249930						+	hypothetical protein
NC_008611	MUL_2927	3250941	3251408						-	hypothetical protein
NC_008611	MUL_2928	3251457	3251834						-	hypothetical protein
NC_008611	MUL_2931	3254347	3254637						-	hypothetical protein
NC_008611	MUL_2939	3261285	3261638						-	hypothetical protein
NC_008611	MUL_2941	3262415	3262783						-	conserved hypothetical protein - truncated
NC_008611	MUL_2957	3281744	3281986						-	PE-PGRS family protein
NC_008611	MUL_2967	3289786	3290457						+	hypothetical protein
NC_008611	MUL_2971	3294771	3295445						-	hypothetical protein
NC_008611	MUL_2974	3297433	3298041						+	conserved secreted protein
NC_008611	MUL_2975	3298133	3298573						+	resuscitation-promoting factor-like protein
NC_008611	MUL_2976	3298629	3299087						+	hypothetical protein
NC_008611	MUL_2978	3299977	3300399						+	conserved lipoprotein LppE
NC_008611	MUL_2979	3300510	3301826						+	cytochrome P450 140A5 Cyp140A5
NC_008611	MUL_2980	3301857	3302387						+	hypothetical protein
NC_008611	MUL_2988	3311428	3312582						-	hypothetical protein
NC_008611	MUL_2992	3315364	3315858						-	hypothetical protein
NC_008611	MUL_2994	3317107	3317289						+	hypothetical protein
NC_008611	MUL_2995	3317320	3318078						-	enoyl-CoA hydratase, EchA8_6
NC_008611	MUL_3005	3327163	3327495						+	hypothetical protein
NC_008611	MUL_3013	3338514	3339179						+	hypothetical protein
NC_008611	MUL_3018	3342815	3343936						-	molybdenum-transport ATP-binding protein ABC transporter ModC
NC_008611	MUL_3020	3345976	3346809						+	O-methyltransferase Omt
NC_008611	MUL_3056	3385216	3386814						-	PE-PGRS family protein
NC_008611	MUL_3067	3402593	3403123						+	hypothetical protein
NC_008611	MUL_3103	3450497	3451024						+	hypothetical protein
NC_008611	MUL_3116	3463025	3463321						-	thioredoxin TrxB1_1
NC_008611	MUL_3118	3463760	3464185						+	hypothetical protein
NC_008611	MUL_3119	3464241	3464603						+	hypothetical protein
NC_008611	MUL_3127	3472767	3474053						+	PPE family protein
NC_008611	MUL_3128	3474405	3474959						-	transcriptional regulatory protein
NC_008611	MUL_3131	3479506	3480720						+	cytochrome P450 144A4 Cyp144A4
NC_008611	MUL_3139	3486810	3487607						-	conserved short-chain dehydrogenase
NC_008611	MUL_3141	3490098	3490820						-	esterase/lipase
NC_008611	MUL_3148	3497062	3497577						+	hypothetical protein
NC_008611	MUL_3156	3509487	3509828						-	hypothetical protein
NC_008611	MUL_3184	3547996	3548367						+	hypothetical protein
NC_008611	MUL_3191	3559252	3560238						-	conserved hypothetical hydrolase/amidase
NC_008611	MUL_3198	3568205	3568714						+	translation initiation inhibitor
NC_008611	MUL_3199	3568769	3569710						+	hypothetical protein
NC_008611	MUL_3200	3569700	3570026						-	hypothetical protein
NC_008611	MUL_3201	3570202	3571014						+	transcriptional regulatory protein (probably GntR-family)
NC_008611	MUL_3202	3571023	3572045						+	conserved hypothetical oxidoreductase
NC_008611	MUL_3203	3572106	3572912						+	hypothetical protein
[truncated: 184 more rows]
