# Supplementary material for: Genomic Diversity and Evolution of Mycobacterium ulcerans Revealed by Next-Generation Sequencing
Source: PLoS Pathog. 2009 Sep 11;5(9):e1000580. doi: 10.1371/journal.ppat.1000580 (PMC2736377; doi:10.1371/journal.ppat.1000580)
Supplement: Table S3 — Primers used for PCR and sequencing of SNP harboring regions. (0.05 MB XLS) [file ppat.1000580.s006.xls]

## Sheet: Supp_Table_3
Supplentary Table 3. Primers used for PCR and sequencing of SNP haboring regions.
Genome_pos	Reference	Strain	Agy99_nt	SNP	Results	Forward primer	Reversed primer
446933	NC_008611	NM20/02	T	C	Multiple bands	GTATTCCGCGTAGATGCTGG	TTGTGAGGAAGCAACGACAG
1238622	NC_008611	NM20/02	C	T	Multiple sequences	CATAGCGTGGTGGTGTATCG	ACCCAACTGTGGTTGGTGAT
1456807	NC_008611	NM20/02	A	C	Multiple sequences	GTCAGCTGCATGACTTCGTC	ATCAACGCTGAGGGTGAGTC
1674860	NC_008611	NM20/02	T	C	Multiple sequences	TAGTGATGAAGGGCTACCGC	TTGGCCGCATAGAGTTCTTC
1827152	NC_008611	NM20/02	T	C	Multiple sequences	ACCAGCAGAACCTGATCTCG	CCGTAGCACTTCCAAACCAT
9877	NC_008611	NM20/02	A	G	Error in Agy99	GATGACGACAGCGAGCTCTA	CGACGTACCGGAGATGAAG
1645178	NC_008611	NM20/02	C	G	Error in Agy99	AAGAATCTACGGGCCGAACT	TGAACTCCTCGACCATCTCC
2366378	NC_008611	NM20/02	A	C	Error in Agy99	GTAGCCATAGATGGTCGCGT	ACTCGGGGTGGTCGTTTC
32013	NC_008611	NM20/02	T	C	Validated	TTCGATACAGAACGTGAGCG	ACCGATGGAGTAAATGTCGG
453370	NC_008611	NM20/02	A	G	Validated	GATTCGTCTTCGGGGAATCT	CTGCTAGCCGAACAGGTGAT
479253	NC_008611	NM20/02	G	C	Validated	GGTCTGCCACTGATCGATTT	GTCGATGGCCAATACGACTT
554471	NC_008611	NM20/02	T	C	Validated	CTCTTCCTGCACGTGTCATC	AAGTCCAGCGAGTGCAATTC
642364	NC_008611	NM20/02	T	C	Validated	CAGAAGTGTCGAGGAGGTGG	TACCGACCCGAGAGATCAAC
661062	NC_008611	NM20/02	T	C	Validated	GATCATCATTCCGCCCTG	AGGAACTACCACCGGAGGAC
753327	NC_008611	NM20/02	C	T	Validated	CTGGATCTGGCGATACATCA	TCTTGCTCGATGGACAGTTG
1183060	NC_008611	NM20/02	T	C	Validated	AGGGTTCTTCTTCCGGTGAC	GTTTGCGATCACCCGTTC
1260409	NC_008611	NM20/02	A	G	Validated	TTGGGGTTGTTGTTACCCAT	TCTACGTTGCGGTAGTGGTG
1289632	NC_008611	NM20/02	T	C	Validated	ATTTCATGCTCTGGGACCTG	CATACAGCTCTGCGCTCAAC
1321620	NC_008611	NM20/02	G	C	Validated	AAAGACCGGACAGATCAACG	ACTTCTTCGAGATTGGTGGC
1699678	NC_008611	NM20/02	A	C	Validated	CGAGTTGCTCTAGGTGGGAC	ACATGGTCGGCTACGTCTTG
1755920	NC_008611	NM20/02	T	C	Validated	CTGTATCTGGTTGGCTCGGT	GAAGATGCCGACTAGCAAGG
2250461	NC_008611	NM20/02	T	C	Validated	GGGTGATGCCGAAGAAGTC	ATACCCGACCATCACCGAT
2283072	NC_008611	NM20/02	G	A	Validated	CGGATTGAAGTTCAGACTTGG	CTTCTTCGAGGCTGGTCTTG
2343185	NC_008611	NM20/02	T	C	Validated	TTCAGCTGGGTAACTGAGCA	CATGACATCCCTGAATAGCG
2348891	NC_008611	NM20/02	C	A	Validated	ACGGACCGGTACTCGTGATA	AATTCACGCCAATTACTCCG
2500819	NC_008611	NM20/02	G	C	Validated	ATCACAATGATGATCGGCAA	CATGCGGCTTCGTTGAGTA
2501883	NC_008611	NM20/02	T	G	Validated	ATAGGGATGACCAACGACCA	GATCGCTATGGAACCGATGT
2507419	NC_008611	NM20/02	A	G	Validated	AGGATGAAGTGCGGAATCAC	AAACGGGAACCTATGTGCTG
2565337	NC_008611	NM20/02	T	C	Validated	ATTACGCATGTCATGATCGC	GCACCGACTACGCGATATTT
2594217	NC_008611	NM20/02	C	G	Validated	GGGTTGAGCAAGTGGTTGAT	GGCGTACAGATTCAGCAGGT
2631719	NC_008611	NM20/02	C	A	Validated	AACGCATAGGTTGGCAGTTC	GTGTTGGAGCTGATGGACCT
2739954	NC_008611	NM20/02	G	A	Validated	GTCAACTTTCATGCCAGGGT	AACGTGTGTTGTTGGACGAA
2829304	NC_008611	NM20/02	A	C	Validated	CCAAGACGACCAAGACGAAT	AGACCACCATCTTGGTCCAG
2936659	NC_008611	NM20/02	A	G	Validated	CAAGAAGCATGGGAACATCC	TGTAGAGCATCGAATCGCAG
3402083	NC_008611	NM20/02	T	G	Validated	TCACCGAAAATCCGAAGAAC	ACGTGAGTGCTCTACCAGGC
3448338	NC_008611	NM20/02	C	T	Validated	GTGGTCCGTACTGCCCTG	CGACATCCTCGATACTGCCT
3497043	NC_008611	NM20/02	T	G	Validated	CTGTCACGGTCGATGGAGTA	ATGGCATTGACGGTGTCTTC
1319292	NC_008611	NM31/04	T	C	No	GTGACGCTCACCTCGGAC	CGTCTTTTCCTCCGTTCAAG
837718	NC_008611	NM31/04	T	A	No	TTGGAAATTCAGGTCAAGGC	GCACATCGTAGGTGTTGAGC
284138	NC_008611	NM31/04	C	A	No	ACCCGGGTAGGTCCATACAT	ATGTACACGTTGCGGTGAAC
369865	NC_008611	NM31/04	A	C	No	AGGTGAATATTGAGCACCCG	AATGCGGTCAACGACAATCT
517882	NC_008611	NM31/04	T	C	No	CGCGGAACTATTCACTGTCA	AACAGCATCATTGCGATACG
621504	NC_008611	NM31/04	G	A	No	CTATAGCAAGCGGGAAATGG	CAGCGGAAAATACCTGTGCT
1709927	NC_008611	NM31/04	A	G	No	GAACGTGGACCATTTTGCTC	TCTACTGTTCGTCGGAAGGC
1222187	NC_008611	NM31/04	A	C	No	ATATCTTCATCGCTGGTGGG	GACCACGTCAAGCGGATT
777933	NC_008611	NM31/04	T	G	No	CCTATGGCAACGGAGGAGT	GTCGATATGTGCCACACCAC
932946	NC_008611	NM31/04	G	T	No	GAGCCCGATGTTGTTATTGC	GCGTTCCTCAAGTTGGTTCA
994764	NC_008611	NM31/04	C	G	No	GGGTGCGAATTCTCAACATT	CCGTGAGTTTACTGCCAACA
84015	NC_008611	NM31/04	T	G	No	GTATCAGGGGAACCCAGGTC	GGCGACGTCAACTACGTCAT
291568	NC_008611	NM31/04	T	C	No	ACACCGGCAACGGCTACTAC	TGTAGGCGACGGTCGAAG
1757195	NC_008611	NM31/04	C	G	No	ACGATGTGGAATCCCAGGTA	GCATCGTTCTGCTGTACTCG
1125937	NC_008611	NM31/04	C	A	No	ACGGATACAAGGACACGACC	GATCGCGACATTGGAGATG
812093	NC_008611	NM31/04	G	T	No	CAACTACCGTCCGCAGTTCT	TCGAGGGCAAAGTAGACGAT
864321	NC_008611	NM31/04	T	G	No	CATCTGGTCGAGCTCAGTGG	CAGTGTCACAATCGCCTCAA
1197914	NC_008611	NM31/04	A	G	No	GATCGAGACGTTTCTGACCG	GCGGTTCGGTCTACTACCAC
1531076	NC_008611	NM31/04	T	G	No	GGATTCCGTTCACGAAGGT	AAGCCGGATATATGTGGACG
321891	NC_008611	NM31/04	G	C	No	AGACAGCACGTTGAGTGTCG	GCTGAATGTCAGGGGAATGT
1055484	NC_008611	NM31/04	T	G	No	GGGTACATGAAGTCCTGCGT	TCAACCAGTTCGTCCAGGAG
39425	NC_008611	NM31/04	G	T	No	CCATAGTGGTCGACGAAACA	CAGCAACGTCTGTGTGCC
637740	NC_008611	NM31/04	T	C	No	TCTACTCGATGATCTGGGGC	AGGTTCAGCCGGTCATACAC
293549	NC_008611	NM31/04	C	G	No	CTCAGCCATGGTGAAATCAA	AAACCTGTCAGAATGGACGC
1887260	NC_008611	Jp8756	C	G	No	GCCGAGAAAGATGTACGAGC	AGGCCAACACATCGAGAAAC
996221	NC_008611	NM31/04	C	G	No	ATCGGTTTTGTCGCACTTTC	GATCCACCGAACTGCTTACC
1575100	NC_008611	NM31/04	A	C	No	TCACCCGGGTTAGTAGGTCA	TGACTACGACGCGATACTGG
12819	NC_008611	NM31/04	G	T	No	GTTGGGATTCCTTCCACTCC	CGTCCCTAGGACTCGCTTAG
196174	NC_008611	NM31/04	A	C	No	ATCGACAGGCTGGTGAACA	CTGGAGATCTACCTGGTCGC
595512	NC_008611	NM31/04	C	A	No	GATAGATTCCTGCGATCCGA	AGTGATCTCGTTCGCGATTT
50673	NC_008611	NM31/04	C	G	No	TGAGTCGAGTCGGTGACATC	GAAAACGACATGACGCTGAA
630887	NC_008611	NM31/04	G	T	No	GTGCCAGTAGGAGGTCTTGC	ACTTTTCGGCAACTTCGCTA
1089218	NC_008611	NM31/04	A	C	No	AGCATTAGTTTGCCCCCTTT	ACAGTCTTGGTCATCATGCG
1525618	NC_008611	NM31/04	G	T	No	GCTCCTACTTCTGCGAGCAT	AGGCCAACACATCGAGAAAC
1272925	NC_008611	NM31/04	A	C	No	GGGATCAACGAACCAGTCAT	CGTAGCGAGGAGGATCTGTC
328722	NC_008611	NM31/04	A	C	No	TCGAATCAGCTGCCATAGTG	ACGTTCGTGCGTACCTATCC
503678	NC_008611	NM31/04	A	C	No	ACGAAAATGGCAATGCAGTA	ATGTGCACACCAGTTCGATG
1177130	NC_008611	Jp8756	C	T	No	CATGTTTTGGAGGTCGGAAC	GGCCAACACATCGAGAAACT
655327	NC_008611	NM31/04	A	C	No	GGGTGATCTTGTGTGCCTG	GTGTGGTGGAAAGCCCTGT
267280	NC_008611	NM31/04	C	A	Multiple sequences	CGACGAATGTTCAACGGTAA	TTCTGCTCGAGAATGTGGG
1120077	NC_008611	NM31/04	A	C	No	GGTTCATTCTGACCAGCCTC	CCGGAAGTAGTGCTCGTAGG
5217	NC_008611	NM31/04	C	T	Validated	GTGGTGACCTCGCTCAAGAT	TGTCAGCGACCTCGACACT
421882	NC_008611	NM31/04	C	G	No	ACCTTCGACTGCAGTGATCC	TTCGTGTTCTGTGAGCTTGG
1259303	NC_008611	Jp8756	C	A	Validated	ACTGGTGATACATCGACGGC	CACGATCACCGAGCTACTCA
1009532	NC_008611	NM31/04	C	T	Validated	ATTCCTCGATACAACGCTGC	CTCCCATAGCCGGATTAGGT
648886	NC_008611	Jp8756	A	G	Validated	TGACCATCATCATGGGACTG	ATGCGAGCAGGAACAACAG
811383	NC_008611	Jp8756	T	C	Validated	GTGTGCCCTACATCCTGGTC	GTAGACCTGGCCCTCGAACT
1266749	NC_008611	Jp8756	G	A	Validated	AGAGCTGCGTGGGTAGTGAC	ATGCCAATGGAGACAGGAAC
1266361	NC_008611	NM31/04	G	A	Validated	CTGCAGGACTCAAACGATCA	AGTACATCAGGAACCGGTCG
818461	NC_008611	Jp8756	C	T	Validated	CTGACCGGTGATTCGTTCTT	GCCATGACTACACGGGACTT
1799372	NC_008611	Jp8756	T	C	Validated	GCTACGTTACTCACGTCCCC	CCATTTACCAGGTAGCCGAC
1166649	NC_008611	Jp8756	C	T	Validated	GTACACAGTTCGACCCCACC	ACCGTCTTCACCAATATCGC
544478	NC_008611	Jp8756	A	G	Failed PCR	AGGCCAACACATCGAGAAAC	AGGACAGCATCGAGCAATTC
92931	NC_008611	Jp8756	G	T	Validated	GGGTACGAGGTGATCGTCAG	GACTGCATCGATACCGACAG
1695491	NC_008611	Jp8756	C	T	Validated	GATTTTGACGAAGACCAGGG	GGTCTCCAGGTTGTGGTTGT
1678319	NC_008611	Jp8756	C	T	Validated	TCGTACGGTCCTACAAGTTGC	ATTGGTCAACATGGTCCAGC
959615	NC_008611	Jp8756	G	A	Validated	CAGTGAGCTGCACCAGGC	TTGGACATCAAGCAATTCCA
127479	NC_008611	Jp8756	T	C	Validated	ATGAAGGTGATGATCTGCCC	ACGACGAGTACGTCTCCACC
1390741	NC_008611	Jp8756	A	G	Validated	GGCTGCTGGATGTCATTTCT	ATTGAAAGGTTGCGTTGGAC
622973	NC_008611	NM31/04	C	T	Validated	CCCATCGAGTGAGTGGATTT	TGATTACGGCCCTGATTGAT
784398	NC_008611	Jp8756	G	A	Validated	GATTCGTTCGAGTGGCTGAT	TGATCTCGGAGAAACCGAAC
1945518	NC_008611	Jp8756	T	C	Validated	CAGACAACACCGACATCGAC	GGTGTAGCTCAACACCAGCA
1551954	NC_008611	Jp8756	G	T	Validated	GCAACACCATCACCACGTT	GACGTCGTCACGGTCAACTA
878453	NC_008611	Jp8756	A	C	Validated	TCACCGTTGATTTGTCTTGC	CTATGCCATCGACCCATCTT
295335	NC_008611	Jp8756	G	T	Validated	GATGGAGCCGAAGACTGC	CTACGGCTTGGGCTAGCAAC
1606880	NC_008611	Jp8756	A	C	Validated	TGTTGGTGCAGGAGGTGAT	AGTTCGTCGAGTTCTACGGC
1860646	NC_008611	Jp8756	C	G	Validated	GCAGTGCATTGTGATCGAAG	CGAGATCGTCTCGAAGTCGT
119244	NC_008611	NM31/04	T	G	Validated	GTATACCGCGCCCTCCAC	CTCAACTCGACGGAGAGGTC
204217	NC_008611	Jp8756	G	A	Validated	GACTGGTCCAGCTCTTCGTC	ATCTATGCCAGCAGCACCTT
1862226	NC_008611	Jp8756	A	G	Validated	GCATTGCTGGAGCTGTTGTA	CTGGTATCGGATCTGGTGCT
962708	NC_008611	Jp8756	A	G	Validated	CTCCTTGGTCACTGCTTGGT	GTCTATGACATCACCGCCG
905730	NC_008611	Jp8756	A	G	Validated	GAATTGACCGCCGAGTTG	GCAGTCGTCGTTGATGTTCA
1891395	NC_008611	Jp8756	G	A	Validated	GTAAACGGTCACACCGTGC	TCCTCCATGGCCAGATAGAG
1131484	NC_008611	Jp8756	T	A	Validated	CGATTCCGTGGAGGACAC	ACAGGTACTTCATCGACGGG
1060649	NC_008611	Jp8756	G	A	Validated	GAACTGATCGGCAACGTCTC	GCTCCACGAAGAACTGACCT
656928	NC_008611	Jp8756	A	G	Validated	GTTCGAGTTGCCATGAAGGT	CGTAGTGCTCTTGTGCCGT
1506702	NC_008611	Jp8756	A	G	Validated	CGATACCACCGACATCGTTT	ATCTATCTCGAGGTGTGGCG
804402	NC_008611	Jp8756	C	T	Validated	TCTGCCCGACTACTTCCAGT	ATACCGCTGCTCATTCTGGT
1428889	NC_008611	Jp8756	C	T	Validated	GGGGAGAATCAGAAGCAGTG	CACCCGATTCATGAAGGAAG
433164	NC_008611	Jp8756	G	T	Validated	GACACGCTGGGCTACATCTC	CAGTGTCGTGCTTGTCCATC
304624	NC_008611	Jp8756	C	T	Validated	GCTCGAACAGATCGATGTCA	GTCATGTTTGTTCCGCAGG
1944770	NC_008611	Jp8756	G	T	Validated	ACTTGAAATCCGGTTTGGTG	ATCCGCTGGTATGTCCAGTC
1629573	NC_008611	Jp8756	G	T	Validated	TCAACGAATTTCCCAACCTC	CATGAAGTGGTACGTCAGCG
1282777	NC_008611	Jp8756	C	T	Validated	CAGATATGGCAGCACCCAG	CTGATGTCCACCCTGCTCTC
